# Supplementary material
Source: publisher figshare collection journal article supplement (https://acs.figshare.com/ndownloader/files/33925246)
Supplement: Supplementary file 1 [file 33925246]

data_p20190927b
_audit_creation_date               2019-09-26
_audit_creation_method
;
Olex2 1.3
(compiled 2019.09.11 svn.r3662 for OlexSys, GUI svn.r5935)
;
_shelx_SHELXL_version_number       '2018/3'
_audit_contact_author_address      ?
_audit_contact_author_email        ?
_audit_contact_author_name         ''
_audit_contact_author_phone        ?
_publ_contact_author_id_orcid      ?
_publ_section_references
;
Dolomanov, O.V., Bourhis, L.J., Gildea, R.J, Howard, J.A.K. & Puschmann, H.
 (2009), J. Appl. Cryst. 42, 339-341.

Sheldrick, G.M. (2015). Acta Cryst. A71, 3-8.

Sheldrick, G.M. (2015). Acta Cryst. C71, 3-8.
;
_chemical_name_common              ?
_chemical_name_systematic          ?
_chemical_formula_moiety           'C12 H18 O3'
_chemical_formula_sum              'C12 H18 O3'
_chemical_formula_weight           210.26
_chemical_absolute_configuration   ad
_chemical_melting_point            ?
_chemical_oxdiff_formula           C13H20O3
loop_
  _atom_type_symbol
  _atom_type_description
  _atom_type_scat_dispersion_real
  _atom_type_scat_dispersion_imag
  _atom_type_scat_source
 'C' 'C' 0.0181 0.0091 'International Tables Vol C Tables 4.2.6.8 and 6.1.1.4'
 'H' 'H' 0.0000 0.0000 'International Tables Vol C Tables 4.2.6.8 and 6.1.1.4'
 'O' 'O' 0.0492 0.0322 'International Tables Vol C Tables 4.2.6.8 and 6.1.1.4'

_shelx_space_group_comment
;
The symmetry employed for this shelxl refinement is uniquely defined
by the following loop, which should always be used as a source of
symmetry information in preference to the above space-group names.
They are only intended as comments.
;
_space_group_crystal_system        'orthorhombic'
_space_group_IT_number             19
_space_group_name_H-M_alt          'P 21 21 21'
_space_group_name_Hall             'P 2ac 2ab'
loop_
  _space_group_symop_operation_xyz
 'x, y, z'
 '-x+1/2, -y, z+1/2'
 '-x, y+1/2, -z+1/2'
 'x+1/2, -y+1/2, -z'

_cell_length_a                     4.62040(10)
_cell_length_b                     7.01440(10)
_cell_length_c                     36.1467(5)
_cell_angle_alpha                  90
_cell_angle_beta                   90
_cell_angle_gamma                  90
_cell_volume                       1171.49(3)
_cell_formula_units_Z              4
_cell_measurement_reflns_used      7052
_cell_measurement_temperature      294.15
_cell_measurement_theta_max        78.9610
_cell_measurement_theta_min        4.9360
_shelx_estimated_absorpt_T_max     ?
_shelx_estimated_absorpt_T_min     ?
_exptl_absorpt_coefficient_mu      0.684
_exptl_absorpt_correction_T_max    1.00000
_exptl_absorpt_correction_T_min    0.54528
_exptl_absorpt_correction_type     multi-scan
_exptl_absorpt_process_details
;
CrysAlisPro 1.171.39.46 (Rigaku Oxford Diffraction, 2018)
Empirical absorption correction using spherical harmonics,
 implemented in SCALE3 ABSPACK scaling algorithm.
;
_exptl_absorpt_special_details     ?
_exptl_crystal_colour              colourless
_exptl_crystal_colour_primary      colourless
_exptl_crystal_density_diffrn      1.192
_exptl_crystal_density_meas        ?
_exptl_crystal_density_method      ?
_exptl_crystal_description         block
_exptl_crystal_F_000               456
_exptl_crystal_size_max            0.28
_exptl_crystal_size_mid            0.24
_exptl_crystal_size_min            0.12
_exptl_transmission_factor_max     ?
_exptl_transmission_factor_min     ?
_diffrn_reflns_av_R_equivalents    0.0156
_diffrn_reflns_av_unetI/netI       0.0135
_diffrn_reflns_Laue_measured_fraction_full  0.999
_diffrn_reflns_Laue_measured_fraction_max  0.988
_diffrn_reflns_limit_h_max         5
_diffrn_reflns_limit_h_min         -2
_diffrn_reflns_limit_k_max         8
_diffrn_reflns_limit_k_min         -8
_diffrn_reflns_limit_l_max         44
_diffrn_reflns_limit_l_min         -45
_diffrn_reflns_number              9238
_diffrn_reflns_point_group_measured_fraction_full  0.994
_diffrn_reflns_point_group_measured_fraction_max  0.965
_diffrn_reflns_theta_full          67.684
_diffrn_reflns_theta_max           79.255
_diffrn_reflns_theta_min           4.894
_diffrn_ambient_temperature        294.15
_diffrn_detector                   PILT
_diffrn_detector_area_resol_mean   ?
_diffrn_measured_fraction_theta_full  0.999
_diffrn_measured_fraction_theta_max  0.988
_diffrn_measurement_details
;
List of Runs (angles in degrees, time in seconds):

  # Type    Start    End  Width  t~exp~   \w     \q     \k     \f   Frames
--------------------------------------------------------------------------
  1  \w    -84.00  66.00   0.50    0.50    --    5.00 -16.00   8.00  300
  2  \w   -140.00  11.00   0.50    0.50    --  -50.10 -16.00   8.00  302
  3  \w   -171.00 -21.00   0.50    0.50    -- -110.00  16.00 178.00  300
  4  \w   -199.00 -49.00   0.50    0.50    -- -110.00 -16.00   8.00  300
  5  \w      8.00  36.00   0.50    0.50    --  -50.10  57.00   0.00   56
  6  \w    -71.00 -45.00   0.50    0.50    --  -50.10  57.00   0.00   52
  7  \w    -45.00 -18.00   0.50    0.50    --  -50.10  38.00 -60.00   54
  8  \w    -76.00  39.00   0.50    0.50    --  -50.10  57.00 -60.00  230
  9  \w    -81.00 -55.00   0.50    0.50    --  -50.10  38.00 -60.00   52
 10  \w   -193.00-102.00   0.50    0.50    -- -110.00 -38.00  30.00  182
 11  \w    -55.00 -29.00   0.50    0.50    -- -110.00  57.00  30.00   52
 12  \w   -137.00 -88.00   0.50    0.50    -- -110.00  72.00 -30.00   98
 13  \w   -137.00 -80.00   0.50    0.50    -- -110.00  57.00  30.00  114
 14  \w    -94.00 -68.00   0.50    0.50    -- -110.00  57.00-180.00   52
 15  \w   -123.00 -21.00   0.50    0.50    -- -110.00  38.00 150.00  204
 16  \w   -143.00 -24.00   0.50    0.50    -- -110.00  72.00 -60.00  238
;
_diffrn_measurement_device         'four-circle diffractometer'
_diffrn_measurement_device_type    'XtaLAB AFC12 (RCD3): Kappa single'
_diffrn_measurement_method         '\w scans'
_diffrn_orient_matrix_type        
 'CrysAlisPro convention (1999,Acta A55,543-557)'
_diffrn_orient_matrix_UB_11        0.0060615000
_diffrn_orient_matrix_UB_12        0.0342660000
_diffrn_orient_matrix_UB_13        0.0420904000
_diffrn_orient_matrix_UB_21        -0.0713482000
_diffrn_orient_matrix_UB_22        -0.2118469000
_diffrn_orient_matrix_UB_23        0.0066679000
_diffrn_orient_matrix_UB_31        0.3255367000
_diffrn_orient_matrix_UB_32        -0.0470001000
_diffrn_orient_matrix_UB_33        0.0006737000
_diffrn_radiation_monochromator    mirror
_diffrn_radiation_probe            x-ray
_diffrn_radiation_type             'Cu K\a'
_diffrn_radiation_wavelength       1.54184
_diffrn_source                     'Rotating-anode X-ray tube'
_diffrn_source_type                'Rigaku (Cu) X-ray Source'
_reflns_Friedel_coverage           0.610
_reflns_Friedel_fraction_full      0.985
_reflns_Friedel_fraction_max       0.929
_reflns_number_gt                  2364
_reflns_number_total               2444
_reflns_odcompleteness_completeness  99.87
_reflns_odcompleteness_iscentric   1
_reflns_odcompleteness_theta       74.33
_reflns_special_details
;
 Reflections were merged by SHELXL according to the crystal
 class for the calculation of statistics and refinement.
 
 _reflns_Friedel_fraction is defined as the number of unique
 Friedel pairs measured divided by the number that would be
 possible theoretically, ignoring centric projections and
 systematic absences.
;
_reflns_threshold_expression       'I > 2\s(I)'
_computing_cell_refinement         'CrysAlisPro 1.171.39.46 (Rigaku OD, 2018)'
_computing_data_collection         'CrysAlisPro 1.171.39.46 (Rigaku OD, 2018)'
_computing_data_reduction          'CrysAlisPro 1.171.39.46 (Rigaku OD, 2018)'
_computing_molecular_graphics      'Olex2 1.3 (Dolomanov et al., 2009)'
_computing_publication_material    'Olex2 1.3 (Dolomanov et al., 2009)'
_computing_structure_refinement    'ShelXL 2018/3 (Sheldrick, 2015)'
_computing_structure_solution      'SHELXT 2018/2 (Sheldrick, 2018)'
_refine_diff_density_max           0.129
_refine_diff_density_min           -0.102
_refine_diff_density_rms           0.030
_refine_ls_abs_structure_details
;
 Flack x determined using 878 quotients [(I+)-(I-)]/[(I+)+(I-)]
 (Parsons, Flack and Wagner, Acta Cryst. B69 (2013) 249-259).
;
_refine_ls_abs_structure_Flack     0.02(6)
_refine_ls_extinction_coef         0.0081(14)
_refine_ls_extinction_expression  
 'Fc^*^=kFc[1+0.001xFc^2^\l^3^/sin(2\q)]^-1/4^'
_refine_ls_extinction_method       'SHELXL-2018/3 (Sheldrick 2018)'
_refine_ls_goodness_of_fit_ref     1.031
_refine_ls_hydrogen_treatment      mixed
_refine_ls_matrix_type             full
_refine_ls_number_parameters       147
_refine_ls_number_reflns           2444
_refine_ls_number_restraints       0
_refine_ls_R_factor_all            0.0325
_refine_ls_R_factor_gt             0.0318
_refine_ls_restrained_S_all        1.031
_refine_ls_shift/su_max            0.001
_refine_ls_shift/su_mean           0.000
_refine_ls_structure_factor_coef   Fsqd
_refine_ls_weighting_details      
 'w=1/[\s^2^(Fo^2^)+(0.0630P)^2^+0.0692P] where P=(Fo^2^+2Fc^2^)/3'
_refine_ls_weighting_scheme        calc
_refine_ls_wR_factor_gt            0.0960
_refine_ls_wR_factor_ref           0.0966
_refine_special_details            ?
_olex2_refinement_description
;
1. Fixed Uiso
 At 1.2 times of:
  All C(H) groups, All C(H,H) groups
 At 1.5 times of:
  All C(H,H,H) groups
2.a Ternary CH refined with riding coordinates:
 C2(H2)
2.b Secondary CH2 refined with riding coordinates:
 C1(H1A,H1B), C3(H3A,H3B), C4(H4A,H4B)
2.c Aromatic/amide H refined with riding coordinates:
 C7(H7), C8(H8), C10(H10)
2.d Idealised Me refined as rotating group:
 C11(H11A,H11B,H11C), C12(H12A,H12B,H12C)
;
_atom_sites_solution_hydrogens     mixed
_atom_sites_solution_primary       dual
_atom_sites_solution_secondary     ?
loop_
  _atom_site_label
  _atom_site_type_symbol
  _atom_site_fract_x
  _atom_site_fract_y
  _atom_site_fract_z
  _atom_site_U_iso_or_equiv
  _atom_site_adp_type
  _atom_site_occupancy
  _atom_site_site_symmetry_order
  _atom_site_calc_flag
  _atom_site_refinement_flags_posn
  _atom_site_refinement_flags_adp
  _atom_site_refinement_flags_occupancy
  _atom_site_disorder_assembly
  _atom_site_disorder_group
 O1 O 0.7099(3) 0.83620(17) 0.72802(3) 0.0532(3) Uani 1 1 d . . . . .
 O2 O 0.6599(3) 0.79484(15) 0.64969(3) 0.0530(3) Uani 1 1 d . . . . .
 O3 O 0.5297(3) 0.18492(17) 0.70985(4) 0.0642(4) Uani 1 1 d . . . . .
 C1 C 0.9266(3) 0.7612(3) 0.70471(4) 0.0505(4) Uani 1 1 d . . . . .
 H1A H 1.047990 0.675505 0.718947 0.061 Uiso 1 1 calc R U . . .
 H1B H 1.047540 0.864868 0.695944 0.061 Uiso 1 1 calc R U . . .
 C2 C 0.8056(3) 0.6544(2) 0.67162(4) 0.0452(3) Uani 1 1 d . . . . .
 H2 H 0.965767 0.600044 0.657307 0.054 Uiso 1 1 calc R U . . .
 C3 C 0.5963(4) 0.4959(2) 0.68237(4) 0.0473(4) Uani 1 1 d . . . . .
 H3A H 0.463592 0.544789 0.700873 0.057 Uiso 1 1 calc R U . . .
 H3B H 0.483071 0.461441 0.660783 0.057 Uiso 1 1 calc R U . . .
 C4 C 0.7386(4) 0.3187(3) 0.69737(5) 0.0602(4) Uani 1 1 d . . . . .
 H4A H 0.856204 0.260867 0.678183 0.072 Uiso 1 1 calc R U . . .
 H4B H 0.864990 0.352876 0.717746 0.072 Uiso 1 1 calc R U . . .
 C5 C 0.5850(4) 0.7509(2) 0.61388(4) 0.0486(4) Uani 1 1 d . . . . .
 C6 C 0.4003(4) 0.8823(3) 0.59681(4) 0.0560(4) Uani 1 1 d . . . . .
 C7 C 0.3220(5) 0.8438(4) 0.56050(5) 0.0737(6) Uani 1 1 d . . . . .
 H7 H 0.199651 0.928420 0.548345 0.088 Uiso 1 1 calc R U . . .
 C8 C 0.4186(5) 0.6848(4) 0.54177(5) 0.0743(6) Uani 1 1 d . . . . .
 H8 H 0.359389 0.663974 0.517516 0.089 Uiso 1 1 calc R U . . .
 C9 C 0.6009(5) 0.5572(3) 0.55853(4) 0.0650(5) Uani 1 1 d . . . . .
 C10 C 0.6825(5) 0.5910(3) 0.59518(4) 0.0584(4) Uani 1 1 d . . . . .
 H10 H 0.803680 0.504965 0.607163 0.070 Uiso 1 1 calc R U . . .
 C11 C 0.2935(6) 1.0563(3) 0.61685(5) 0.0744(6) Uani 1 1 d . . . . .
 H11A H 0.280994 1.029631 0.642850 0.112 Uiso 1 1 calc R U . . .
 H11B H 0.105576 1.090509 0.607657 0.112 Uiso 1 1 calc R U . . .
 H11C H 0.425524 1.159928 0.612845 0.112 Uiso 1 1 calc R U . . .
 C12 C 0.7138(7) 0.3828(4) 0.53893(6) 0.0919(8) Uani 1 1 d . . . . .
 H12A H 0.602846 0.361239 0.516868 0.138 Uiso 1 1 calc R U . . .
 H12B H 0.697310 0.274159 0.554941 0.138 Uiso 1 1 calc R U . . .
 H12C H 0.913316 0.401874 0.532483 0.138 Uiso 1 1 calc R U . . .
 H3 H 0.458(5) 0.225(4) 0.7279(7) 0.080(7) Uiso 1 1 d . . . . .
 H1 H 0.653(5) 0.935(4) 0.7207(6) 0.074(7) Uiso 1 1 d . . . . .

loop_
  _atom_site_aniso_label
  _atom_site_aniso_U_11
  _atom_site_aniso_U_22
  _atom_site_aniso_U_33
  _atom_site_aniso_U_23
  _atom_site_aniso_U_13
  _atom_site_aniso_U_12
 O1 0.0696(7) 0.0503(6) 0.0399(5) 0.0038(4) 0.0076(5) 0.0130(6)
 O2 0.0728(7) 0.0496(6) 0.0367(5) 0.0018(4) -0.0083(5) 0.0084(5)
 O3 0.0927(10) 0.0462(6) 0.0537(7) 0.0016(5) 0.0175(6) 0.0106(7)
 C1 0.0501(8) 0.0621(9) 0.0394(7) -0.0029(6) -0.0015(6) 0.0049(7)
 C2 0.0467(7) 0.0523(8) 0.0365(6) 0.0009(5) 0.0009(6) 0.0092(7)
 C3 0.0488(8) 0.0483(7) 0.0449(7) 0.0016(6) -0.0008(6) 0.0101(6)
 C4 0.0626(10) 0.0588(9) 0.0593(9) 0.0144(7) 0.0082(8) 0.0181(8)
 C5 0.0571(8) 0.0521(7) 0.0366(6) 0.0054(6) -0.0014(6) -0.0051(7)
 C6 0.0623(10) 0.0610(9) 0.0449(7) 0.0133(7) -0.0018(7) -0.0017(8)
 C7 0.0830(13) 0.0898(14) 0.0482(8) 0.0150(9) -0.0148(9) 0.0035(12)
 C8 0.0911(14) 0.0927(14) 0.0390(8) 0.0038(9) -0.0104(9) -0.0133(13)
 C9 0.0812(13) 0.0715(11) 0.0421(8) -0.0034(8) 0.0038(8) -0.0128(10)
 C10 0.0732(11) 0.0601(9) 0.0419(7) -0.0005(7) -0.0020(8) 0.0021(9)
 C11 0.0936(15) 0.0665(10) 0.0630(10) 0.0136(9) -0.0059(11) 0.0169(11)
 C12 0.128(2) 0.0920(15) 0.0559(10) -0.0227(11) 0.0051(13) -0.0073(16)

_geom_special_details
;
 All esds (except the esd in the dihedral angle between two l.s. planes)
 are estimated using the full covariance matrix.  The cell esds are taken
 into account individually in the estimation of esds in distances, angles
 and torsion angles; correlations between esds in cell parameters are only
 used when they are defined by crystal symmetry.  An approximate (isotropic)
 treatment of cell esds is used for estimating esds involving l.s. planes.
;
loop_
  _geom_bond_atom_site_label_1
  _geom_bond_atom_site_label_2
  _geom_bond_distance
  _geom_bond_site_symmetry_2
  _geom_bond_publ_flag
 O1 C1 1.4103(19) . ?
 O1 H1 0.78(3) . ?
 O2 C2 1.4329(17) . ?
 O2 C5 1.3747(17) . ?
 O3 C4 1.419(2) . ?
 O3 H3 0.79(3) . ?
 C1 H1A 0.9700 . ?
 C1 H1B 0.9700 . ?
 C1 C2 1.518(2) . ?
 C2 H2 0.9800 . ?
 C2 C3 1.524(2) . ?
 C3 H3A 0.9700 . ?
 C3 H3B 0.9700 . ?
 C3 C4 1.507(2) . ?
 C4 H4A 0.9700 . ?
 C4 H4B 0.9700 . ?
 C5 C6 1.399(2) . ?
 C5 C10 1.385(2) . ?
 C6 C7 1.388(2) . ?
 C6 C11 1.502(3) . ?
 C7 H7 0.9300 . ?
 C7 C8 1.379(3) . ?
 C8 H8 0.9300 . ?
 C8 C9 1.370(3) . ?
 C9 C10 1.398(2) . ?
 C9 C12 1.507(3) . ?
 C10 H10 0.9300 . ?
 C11 H11A 0.9600 . ?
 C11 H11B 0.9600 . ?
 C11 H11C 0.9600 . ?
 C12 H12A 0.9600 . ?
 C12 H12B 0.9600 . ?
 C12 H12C 0.9600 . ?

loop_
  _geom_angle_atom_site_label_1
  _geom_angle_atom_site_label_2
  _geom_angle_atom_site_label_3
  _geom_angle
  _geom_angle_site_symmetry_1
  _geom_angle_site_symmetry_3
  _geom_angle_publ_flag
 C1 O1 H1 111.4(17) . . ?
 C5 O2 C2 119.03(11) . . ?
 C4 O3 H3 108.3(19) . . ?
 O1 C1 H1A 108.9 . . ?
 O1 C1 H1B 108.9 . . ?
 O1 C1 C2 113.16(13) . . ?
 H1A C1 H1B 107.8 . . ?
 C2 C1 H1A 108.9 . . ?
 C2 C1 H1B 108.9 . . ?
 O2 C2 C1 105.64(12) . . ?
 O2 C2 H2 109.3 . . ?
 O2 C2 C3 110.13(13) . . ?
 C1 C2 H2 109.3 . . ?
 C1 C2 C3 113.15(12) . . ?
 C3 C2 H2 109.3 . . ?
 C2 C3 H3A 108.6 . . ?
 C2 C3 H3B 108.6 . . ?
 H3A C3 H3B 107.6 . . ?
 C4 C3 C2 114.61(14) . . ?
 C4 C3 H3A 108.6 . . ?
 C4 C3 H3B 108.6 . . ?
 O3 C4 C3 111.28(14) . . ?
 O3 C4 H4A 109.4 . . ?
 O3 C4 H4B 109.4 . . ?
 C3 C4 H4A 109.4 . . ?
 C3 C4 H4B 109.4 . . ?
 H4A C4 H4B 108.0 . . ?
 O2 C5 C6 114.90(14) . . ?
 O2 C5 C10 123.98(15) . . ?
 C10 C5 C6 121.12(15) . . ?
 C5 C6 C11 121.52(15) . . ?
 C7 C6 C5 116.59(18) . . ?
 C7 C6 C11 121.89(18) . . ?
 C6 C7 H7 118.7 . . ?
 C8 C7 C6 122.51(19) . . ?
 C8 C7 H7 118.7 . . ?
 C7 C8 H8 119.7 . . ?
 C9 C8 C7 120.67(16) . . ?
 C9 C8 H8 119.7 . . ?
 C8 C9 C10 118.33(19) . . ?
 C8 C9 C12 122.36(18) . . ?
 C10 C9 C12 119.3(2) . . ?
 C5 C10 C9 120.78(18) . . ?
 C5 C10 H10 119.6 . . ?
 C9 C10 H10 119.6 . . ?
 C6 C11 H11A 109.5 . . ?
 C6 C11 H11B 109.5 . . ?
 C6 C11 H11C 109.5 . . ?
 H11A C11 H11B 109.5 . . ?
 H11A C11 H11C 109.5 . . ?
 H11B C11 H11C 109.5 . . ?
 C9 C12 H12A 109.5 . . ?
 C9 C12 H12B 109.5 . . ?
 C9 C12 H12C 109.5 . . ?
 H12A C12 H12B 109.5 . . ?
 H12A C12 H12C 109.5 . . ?
 H12B C12 H12C 109.5 . . ?

loop_
  _geom_torsion_atom_site_label_1
  _geom_torsion_atom_site_label_2
  _geom_torsion_atom_site_label_3
  _geom_torsion_atom_site_label_4
  _geom_torsion
  _geom_torsion_site_symmetry_1
  _geom_torsion_site_symmetry_2
  _geom_torsion_site_symmetry_3
  _geom_torsion_site_symmetry_4
  _geom_torsion_publ_flag
 O1 C1 C2 O2 65.61(17) . . . . ?
 O1 C1 C2 C3 -54.94(17) . . . . ?
 O2 C2 C3 C4 165.92(12) . . . . ?
 O2 C5 C6 C7 179.43(17) . . . . ?
 O2 C5 C6 C11 -0.4(3) . . . . ?
 O2 C5 C10 C9 -178.92(18) . . . . ?
 C1 C2 C3 C4 -76.12(17) . . . . ?
 C2 O2 C5 C6 169.26(15) . . . . ?
 C2 O2 C5 C10 -11.2(2) . . . . ?
 C2 C3 C4 O3 174.69(13) . . . . ?
 C5 O2 C2 C1 165.24(13) . . . . ?
 C5 O2 C2 C3 -72.25(16) . . . . ?
 C5 C6 C7 C8 0.1(3) . . . . ?
 C6 C5 C10 C9 0.6(3) . . . . ?
 C6 C7 C8 C9 -0.5(4) . . . . ?
 C7 C8 C9 C10 1.0(3) . . . . ?
 C7 C8 C9 C12 -179.4(2) . . . . ?
 C8 C9 C10 C5 -1.0(3) . . . . ?
 C10 C5 C6 C7 -0.1(3) . . . . ?
 C10 C5 C6 C11 -179.99(18) . . . . ?
 C11 C6 C7 C8 179.9(2) . . . . ?
 C12 C9 C10 C5 179.32(19) . . . . ?

_shelx_res_file
;
TITL p20190927b_a.res in P2(1)2(1)2(1)
    p20190927b.res
    created by SHELXL-2018/3 at 22:38:35 on 26-Sep-2019
REM Old TITL P20190927b in P2(1)2(1)2(1)
REM SHELXT solution in P2(1)2(1)2(1): R1 0.143, Rweak 0.054, Alpha 0.005
REM <I/s> 1.676 for 29 systematic absences, Orientation as input
REM Flack x = 0.130 ( 0.056 ) from 876 Parsons' quotients
REM Formula found by SHELXT: C12 O3
CELL 1.54184 4.6204 7.0144 36.1467 90 90 90
ZERR 4 0.0001 0.0001 0.0005 0 0 0
LATT -1
SYMM 0.5-X,-Y,0.5+Z
SYMM -X,0.5+Y,0.5-Z
SYMM 0.5+X,0.5-Y,-Z
SFAC C H O
UNIT 48 72 12

L.S. 15 0 0
PLAN  5
TEMP 21
CONF
BOND $h
htab
fmap 2 53
acta
REM <olex2.extras>
REM <HklSrc "%.\\P20190927b.hkl">
REM </olex2.extras>

WGHT    0.063000    0.069200
EXTI    0.008121
FVAR       1.42356
O1    3    0.709914    0.836201    0.728017    11.00000    0.06956    0.05033 =
         0.03986    0.00380    0.00756    0.01299
O2    3    0.659867    0.794842    0.649688    11.00000    0.07283    0.04955 =
         0.03671    0.00177   -0.00825    0.00836
O3    3    0.529743    0.184919    0.709845    11.00000    0.09267    0.04620 =
         0.05366    0.00163    0.01748    0.01062
C1    1    0.926627    0.761240    0.704711    11.00000    0.05005    0.06211 =
         0.03936   -0.00294   -0.00147    0.00488
AFIX  23
H1A   2    1.047990    0.675505    0.718947    11.00000   -1.20000
H1B   2    1.047540    0.864868    0.695944    11.00000   -1.20000
AFIX   0
C2    1    0.805649    0.654381    0.671624    11.00000    0.04669    0.05233 =
         0.03654    0.00094    0.00088    0.00920
AFIX  13
H2    2    0.965767    0.600044    0.657307    11.00000   -1.20000
AFIX   0
C3    1    0.596293    0.495906    0.682369    11.00000    0.04878    0.04825 =
         0.04490    0.00163   -0.00078    0.01012
AFIX  23
H3A   2    0.463592    0.544789    0.700873    11.00000   -1.20000
H3B   2    0.483071    0.461441    0.660783    11.00000   -1.20000
AFIX   0
C4    1    0.738590    0.318667    0.697375    11.00000    0.06263    0.05885 =
         0.05925    0.01435    0.00815    0.01806
AFIX  23
H4A   2    0.856204    0.260867    0.678183    11.00000   -1.20000
H4B   2    0.864990    0.352876    0.717746    11.00000   -1.20000
AFIX   0
C5    1    0.584986    0.750949    0.613880    11.00000    0.05709    0.05214 =
         0.03661    0.00543   -0.00143   -0.00507
C6    1    0.400337    0.882341    0.596814    11.00000    0.06227    0.06101 =
         0.04486    0.01326   -0.00175   -0.00165
C7    1    0.321972    0.843791    0.560502    11.00000    0.08296    0.08981 =
         0.04823    0.01496   -0.01484    0.00351
AFIX  43
H7    2    0.199651    0.928420    0.548345    11.00000   -1.20000
AFIX   0
C8    1    0.418572    0.684820    0.541772    11.00000    0.09111    0.09270 =
         0.03903    0.00376   -0.01045   -0.01333
AFIX  43
H8    2    0.359389    0.663974    0.517516    11.00000   -1.20000
AFIX   0
C9    1    0.600868    0.557246    0.558531    11.00000    0.08124    0.07148 =
         0.04214   -0.00343    0.00377   -0.01280
C10   1    0.682484    0.590958    0.595184    11.00000    0.07319    0.06006 =
         0.04190   -0.00053   -0.00200    0.00213
AFIX  43
H10   2    0.803680    0.504965    0.607163    11.00000   -1.20000
AFIX   0
C11   1    0.293461    1.056304    0.616850    11.00000    0.09356    0.06650 =
         0.06304    0.01359   -0.00587    0.01692
AFIX 137
H11A  2    0.280994    1.029631    0.642850    11.00000   -1.50000
H11B  2    0.105576    1.090509    0.607657    11.00000   -1.50000
H11C  2    0.425524    1.159928    0.612845    11.00000   -1.50000
AFIX   0
C12   1    0.713841    0.382793    0.538926    11.00000    0.12767    0.09203 =
         0.05587   -0.02268    0.00514   -0.00731
AFIX 137
H12A  2    0.602846    0.361239    0.516868    11.00000   -1.50000
H12B  2    0.697310    0.274159    0.554941    11.00000   -1.50000
H12C  2    0.913316    0.401874    0.532483    11.00000   -1.50000
AFIX   0
H3    2    0.457542    0.225417    0.727926    11.00000    0.08037
H1    2    0.652831    0.934537    0.720692    11.00000    0.07416
HKLF 4


REM  p20190927b_a.res in P2(1)2(1)2(1)
REM wR2 = 0.0966, GooF = S = 1.031, Restrained GooF = 1.031 for all data
REM R1 = 0.0318 for 2364 Fo > 4sig(Fo) and 0.0325 for all 2444 data
REM 147 parameters refined using 0 restraints

END

WGHT      0.0630      0.0692

REM Instructions for potential hydrogen bonds
EQIV $1 -x+1, y-1/2, -z+3/2
HTAB O3 O1_$1
EQIV $2 x, y+1, z
HTAB O1 O3_$2

REM Highest difference peak  0.129,  deepest hole -0.102,  1-sigma level  0.030
Q1    1   0.4671  1.1039  0.6394  11.00000  0.05    0.13
Q2    1   0.2424  1.1645  0.5990  11.00000  0.05    0.12
Q3    1   0.9580  0.3021  0.7000  11.00000  0.05    0.12
Q4    1   0.5056  0.8428  0.6002  11.00000  0.05    0.10
Q5    1   1.1486  0.8074  0.6994  11.00000  0.05    0.10
;
_shelx_res_checksum                23993
_shelx_hkl_file
;
   0   0  -3    0.51    0.10
   0   0  -4 1066.61   18.03
   0   0  -5    0.09    0.17
   0   0  -6  686.66   11.94
   0   0  -7    0.01    0.19
   0   0  -8 8734.96  145.30
   0   0  -9    0.85    0.26
   0   0 -10 1312.05   22.68
   0   0 -11    0.74    0.33
   0   0 -12 9961.53  166.00
   0   0 -13    0.53    0.32
   0   0 -14  448.89    8.78
   0   0 -15    0.71    0.38
   0   0 -16 2103.57   36.56
   0   0 -17    0.76    0.44
   0   0 -18 3398.44   58.17
   0   0 -19    3.21    0.64
   0   0 -20 2001.97   35.36
   0   0 -21    0.57    0.56
   0   0  22    0.72    0.47
   0   0  23   -0.06    0.45
   0   0 -24  191.72    5.24
   0   0  24  198.23    5.17
   0   0  24  194.02    5.12
   0   0  25   -0.03    0.42
   0   0 -25    0.30    0.41
   0   0  26    2.48    0.64
   0   0  26    3.95    0.77
   0   0 -26    3.05    0.69
   0   0  27   -0.04    0.43
   0   0 -27    0.13    0.46
   0   0  28    2.61    0.70
   0   0 -28    3.04    0.78
   0   0  28    3.00    0.76
   0   0  29    0.16    0.48
   0   0 -29    0.37    0.56
   0   0  29    0.20    0.51
   0   0  30    1.19    0.57
   0   0  30    1.62    0.67
   0   0 -30    1.19    0.66
   0   0  31    0.08    0.42
   0   0  31    0.13    0.57
   0   0 -31    0.44    0.56
   0   0 -32    3.32    0.83
   0   0  32    3.47    0.73
   0   0 -33    0.35    0.71
   0   0  33    0.47    0.49
   0   0  34  564.78   12.47
   0   0 -34  629.82   13.23
   0   0  35    0.77    0.55
   0   0 -35    0.98    0.71
   0   0 -36  228.36    6.44
   0   0 -37    0.96    0.68
   0   0 -38  380.49    9.02
   0   0 -39    0.44    0.57
   0   0 -40    0.70    0.58
   0   0 -41    0.37    0.51
   0   0 -42   48.18    2.06
   0   0 -43    0.15    0.39
   0   0 -44   17.65    1.04
   0   0 -45   -0.14    0.24
   0   1   0    0.29    0.10
   0   1  -1 9234.43  153.79
   0   1  -1 9318.66  153.76
   0   1  -2  368.36    6.37
   0   1  -3 2078.73   34.68
   0   1   4   70.94    1.55
   0   1  -4   86.50    1.61
   0   1   5 2488.70   41.61
   0   1  -5 2497.55   41.61
   0   1   6 4880.92   80.83
   0   1  -6 4839.94   80.83
   0   1  -7    0.48    0.22
   0   1  -7    0.81    0.21
   0   1  -8 5019.24   84.16
   0   1  -8 5081.89   84.05
   0   1   8 5023.48   84.00
   0   1  -9  452.89    8.12
   0   1  -9  446.62    8.26
   0   1   9  443.98    8.05
   0   1 -10 4210.95   71.44
   0   1 -10 4349.29   71.64
   0   1  10 4261.47   71.38
   0   1 -11  526.93    9.54
   0   1  11  528.74    9.49
   0   1 -11  513.04    9.70
   0   1 -12 2009.18   34.39
   0   1  12 2028.78   34.36
   0   1  13 2562.32   42.90
   0   1 -13 2492.91   42.86
   0   1  14   89.18    2.43
   0   1 -14   92.12    2.44
   0   1  15 2398.78   40.97
   0   1 -16  289.17    6.29
   0   1  16  290.37    6.09
   0   1  17  530.14   10.26
   0   1 -17  528.26   10.43
   0   1 -18    0.36    0.37
   0   1  18    0.44    0.35
   0   1 -19  484.15    9.77
   0   1  19  474.86    9.59
   0   1  20  506.26   10.44
   0   1 -20  544.25   10.71
   0   1  21  485.27   10.06
   0   1 -21  501.46   10.24
   0   1 -22   16.03    1.24
   0   1  22   14.96    1.17
   0   1  23  255.95    6.16
   0   1  23  251.05    6.32
   0  -1 -23  237.29    6.17
   0  -1 -24  180.30    5.08
   0   1  24  188.44    5.05
   0   1 -24  168.67    5.01
   0   1  24  189.44    5.19
   0  -1  24  182.08    4.86
   0  -1 -24  179.53    5.25
   0  -1 -25  252.42    6.67
   0  -1 -25  253.62    6.58
   0   1  25  265.57    6.51
   0  -1  25  259.21    6.32
   0  -1 -26   11.20    1.18
   0   1 -26   11.90    1.21
   0  -1  26   12.13    1.21
   0  -1 -26   11.15    1.18
   0  -1  26   11.12    1.07
   0   1  26    8.43    1.01
   0   1  27   27.52    1.73
   0  -1  27   31.29    1.88
   0  -1  27   29.83    1.74
   0  -1 -27   28.57    1.86
   0  -1 -27   29.96    1.87
   0  -1  28   43.04    2.27
   0  -1 -28   40.18    2.21
   0  -1 -28   41.43    2.31
   0  -1  28   41.68    2.10
   0   1  28   43.28    2.21
   0  -1 -29   64.05    2.83
   0   1  29   59.78    2.72
   0  -1  29   65.11    2.84
   0  -1 -29   65.98    2.95
   0  -1  29   61.04    2.64
   0   1  30   21.92    1.62
   0  -1 -30   20.87    1.68
   0  -1  30   19.81    1.49
   0  -1 -30   20.24    1.57
   0  -1  30   20.00    1.56
   0  -1  31    7.09    1.00
   0  -1 -31    8.21    1.05
   0   1  31    6.88    0.96
   0  -1 -31    8.44    1.12
   0  -1  31    7.25    1.00
   0  -1  32   12.45    1.26
   0  -1  32    9.99    1.20
   0   1  32   12.90    1.26
   0  -1 -32   10.77    1.18
   0  -1 -32   13.77    1.39
   0  -1  33    1.85    0.70
   0   1  33    1.35    0.55
   0  -1 -33    2.26    0.79
   0   1 -33    2.41    0.86
   0   1 -34   28.82    2.05
   0  -1  34   28.12    1.80
   0   1  34   25.94    1.76
   0  -1 -34   31.48    2.09
   0   1 -35  195.51    5.93
   0  -1  35  187.59    5.37
   0  -1 -36    2.43    0.82
   0   1 -36    3.12    0.88
   0  -1 -37  342.31    8.29
   0   1 -37  328.27    8.28
   0   1 -38   13.32    1.35
   0  -1 -38   13.23    1.31
   0   1 -39    4.18    0.87
   0  -1 -39    5.04    0.86
   0   1 -40    0.22    0.48
   0  -1 -40    0.56    0.49
   0   1 -41   -0.10    0.47
   0  -1 -41    0.19    0.44
   0   1 -42   -0.11    0.46
   0  -1 -42    0.55    0.43
   0  -1  42    0.16    0.24
   0  -1 -43    2.38    0.49
   0   1 -43    1.95    0.48
   0  -1 -44   22.31    1.10
   0   1 -44   21.51    1.11
   0  -1 -45    3.93    0.41
   0   1 -45    3.90    0.44
   0   2   0 6800.64  112.49
   0   2   0 6733.38  112.33
   0   2  -1  255.60    4.81
   0   2   1  259.75    4.87
   0   2  -1  259.74    4.71
   0   2   1  250.89    4.66
   0   2  -2 3758.35   62.76
   0   2  -3  340.04    6.19
   0   2  -4 1008.84   17.27
   0   2  -5 1359.02   23.10
   0   2  -6  215.97    4.16
   0   2  -7   25.85    0.88
   0   2  -8   13.46    0.63
   0   2  -9  393.40    7.21
   0   2 -10    0.38    0.22
   0   2 -10    2.47    0.39
   0   2 -11  219.65    4.73
   0   2 -11  221.74    4.49
   0   2 -12 2147.17   35.71
   0   2 -12 2066.25   36.00
   0   2  12 2070.94   35.66
   0   2  13  164.26    3.66
   0   2 -13  163.83    3.67
   0   2 -13  163.83    3.95
   0   2 -14 1776.14   30.44
   0   2  14 1738.31   30.43
   0   2 -14 1802.84   30.87
   0   2 -15  319.83    6.77
   0   2  15  318.69    6.46
   0   2 -15  316.05    6.39
   0   2 -16 1231.11   22.99
   0   2 -16 1281.75   22.53
   0   2 -17    8.26    0.69
   0   2  17    9.26    0.76
   0   2  18    4.49    0.59
   0   2  19  320.61    6.97
   0   2  20  508.53   10.46
   0   2 -20  531.97   10.72
   0   2 -21    3.55    0.68
   0   2  21    4.20    0.64
   0   2 -22  403.55    8.75
   0  -2 -22  379.23    8.77
   0  -2  22  386.35    8.41
   0   2  22  397.73    8.65
   0   2 -23  586.20   11.98
   0  -2 -23  614.19   12.79
   0   2  23  581.13   11.94
   0  -2 -23  575.05   12.09
   0  -2  23  563.42   11.65
   0  -2 -24  143.19    4.71
   0   2  24  133.33    4.19
   0  -2  24  134.32    3.96
   0   2 -24  139.25    4.19
   0  -2 -24  129.80    4.28
   0  -2 -25 1167.44   22.35
   0   2  25 1183.90   22.24
   0   2 -25 1160.14   22.14
   0  -2  25 1162.06   21.82
   0  -2 -25 1244.75   23.01
   0  -2 -26  221.48    6.29
   0   2  26  222.50    5.88
   0  -2 -26  214.67    5.96
   0  -2  26  210.10    5.53
   0   2 -26  203.38    5.71
   0  -2 -27  230.39    6.41
   0  -2 -27  246.85    6.77
   0   2 -27  235.57    6.22
   0  -2  27  234.89    5.99
   0  -2  28    4.04    0.86
   0  -2  28    3.38    0.74
   0  -2 -28    3.42    0.89
   0  -2 -28    2.76    0.76
   0  -2  29  101.92    3.71
   0  -2 -29  100.08    3.91
   0  -2 -29   96.01    3.76
   0  -2  29   93.58    3.38
   0  -2 -30    1.20    0.72
   0  -2  30    0.75    0.57
   0  -2 -30    2.10    0.75
   0  -2  30    2.47    0.68
   0  -2  31    1.32    0.64
   0  -2  31    2.27    0.66
   0  -2 -31    1.58    0.69
   0  -2 -32  319.50    8.14
   0  -2  32  323.48    7.61
   0  -2  32  310.17    7.84
   0  -2  33   49.30    2.47
   0  -2  33   47.85    2.32
   0  -2 -33   54.39    2.74
   0  -2  34   42.10    2.25
   0  -2  34   43.47    2.18
   0  -2 -34   48.54    2.52
   0  -2  35    0.85    0.58
   0  -2 -35    1.40    0.69
   0  -2 -36    4.14    0.87
   0  -2  36    4.77    0.84
   0  -2 -37    3.99    0.82
   0  -2  37    3.63    0.74
   0  -2 -38   56.96    2.54
   0  -2 -39   16.21    1.29
   0  -2 -40   15.91    1.18
   0  -2 -41   78.99    2.65
   0  -2 -42    5.15    0.64
   0  -2 -43   26.69    1.21
   0  -2 -44    5.79    0.48
   0   3   0   -0.06    0.20
   0   3   1   44.69    1.35
   0   3  -1   44.74    1.51
   0   3  -2 1184.06   20.70
   0   3   2 1187.19   20.42
   0   3   2 1215.12   20.83
   0   3   3  243.83    4.70
   0   3   3  251.12    5.10
   0   3  -3  244.13    4.93
   0   3   4  925.83   16.39
   0   3  -4  930.76   16.16
   0   3   4  910.18   15.94
   0   3  -5   31.63    1.15
   0   3  -6  271.13    5.37
   0   3  -7 2712.37   45.84
   0   3  -8 2186.41   37.16
   0   3  -9  131.40    3.03
   0   3 -10   29.84    1.14
   0   3 -11 1142.18   19.94
   0   3 -12 2047.46   35.55
   0   3 -12 2134.46   36.12
   0   3 -13  637.14   11.68
   0   3 -13  633.79   12.18
   0   3 -14  267.87    6.06
   0   3 -15   30.65    1.58
   0   3 -16  212.55    5.28
   0   3 -17   18.12    1.27
   0   3 -18    3.41    0.64
   0  -3 -18    3.03    0.61
   0  -3 -19    0.11    0.37
   0  -3  19    0.59    0.42
   0  -3  20  149.86    4.13
   0  -3 -20  145.56    4.47
   0  -3 -21  245.68    6.86
   0  -3  21  242.89    5.88
   0  -3 -21  237.47    6.30
   0  -3  22  519.69   10.60
   0  -3 -22  513.36   11.08
   0  -3 -23   93.18    3.59
   0  -3 -23  100.83    4.03
   0  -3  23   97.59    3.30
   0  -3 -24   93.81    3.56
   0  -3  24   91.08    3.20
   0  -3 -24   92.54    3.93
   0  -3 -25  948.52   18.91
   0  -3  25  917.37   17.61
   0  -3 -25  888.67   18.12
   0  -3 -26  423.19    9.89
   0  -3  26  426.55    9.38
   0  -3 -27  685.95   14.38
   0  -3  27  681.39   13.85
   0  -3  28    2.53    0.68
   0  -3  28    2.72    0.77
   0  -3 -28    3.52    0.87
   0  -3  29    7.85    0.98
   0  -3 -29    8.64    1.15
   0  -3  29    9.54    1.09
   0  -3  30  239.73    6.08
   0  -3  30  217.52    6.04
   0  -3 -30  232.73    6.53
   0   3 -30  242.19    6.76
   0  -3  31  425.90    9.86
   0  -3  31  455.21    9.83
   0  -3 -31  459.84   10.43
   0   3 -31  465.02   10.68
   0  -3 -32  230.04    6.36
   0   3 -32  231.36    6.58
   0  -3  32  231.18    5.87
   0  -3  32  210.17    5.84
   0  -3  33    1.79    0.68
   0  -3 -33    0.58    0.67
   0   3 -33    0.71    0.75
   0  -3 -34   93.45    3.51
   0  -3  34   86.04    3.08
   0   3 -34   89.82    3.61
   0  -3 -35   33.11    1.96
   0   3 -35   31.88    2.03
   0  -3  35   32.84    1.73
   0  -3 -36   15.11    1.28
   0   3 -36   15.81    1.40
   0  -3  36   12.94    1.08
   0  -3 -37   17.38    1.31
   0  -3  37   13.66    1.07
   0   3 -37   14.51    1.32
   0  -3  38   23.27    1.30
   0   3 -38   26.47    1.64
   0  -3 -38   28.72    1.59
   0  -3 -39    2.18    0.54
   0   3 -39    1.40    0.63
   0  -3 -40  223.84    5.05
   0   3 -40  204.85    5.09
   0   3 -41   29.51    1.41
   0  -3 -41   32.15    1.36
   0  -3 -42    9.41    0.63
   0   3 -42    9.61    0.73
   0   3 -43    1.08    0.27
   0   4   0  133.58    3.42
   0   4  -1  753.28   13.73
   0   4   1  737.24   13.77
   0   4  -2  321.44    6.57
   0   4   2  314.39    6.64
   0   4   3  412.26    8.23
   0   4  -3  405.24    8.05
   0   4   4  257.56    5.69
   0   4  -4  256.45    5.52
   0   4   5   31.14    1.49
   0   4  -5   33.47    1.40
   0   4   6  626.22   12.30
   0   4  -6  659.97   12.02
   0   4   7  373.67    7.92
   0   4  -7  388.26    7.60
   0   4  -8   20.43    1.04
   0   4   8   16.30    1.13
   0   4   9   20.26    1.28
   0   4  10   49.76    2.08
   0   4  11  271.89    6.37
   0  -4 -12  142.92    4.29
   0   4 -12  179.08    4.50
   0  -4  13  178.28    4.59
   0   4 -13  183.76    4.72
   0  -4  14   18.89    1.27
   0  -4 -14   17.02    1.31
   0   4 -14   18.62    1.30
   0  -4 -15    1.08    0.48
   0   4 -15    0.07    0.40
   0  -4  15    0.79    0.46
   0   4 -16  513.00   10.47
   0  -4  16  506.42   10.25
   0  -4  17   71.65    2.69
   0  -4 -17   65.82    2.85
   0  -4  18   21.10    1.41
   0  -4 -18   17.25    1.45
   0  -4 -19    0.09    0.46
   0  -4  19    2.17    0.58
   0  -4 -20   10.07    1.17
   0  -4  20    9.74    1.03
   0  -4  21  290.56    6.87
   0  -4 -21  272.47    7.25
   0  -4 -22  322.79    8.31
   0  -4  22  346.31    7.86
   0  -4  23  440.03    9.48
   0  -4 -23  408.64    9.91
   0  -4  24    5.48    0.93
   0  -4 -24    7.11    1.09
   0  -4  25  463.48   10.08
   0  -4 -25  458.84   10.61
   0  -4  26  118.31    3.83
   0  -4  26  131.01    4.08
   0  -4 -26  124.17    4.45
   0  -4  27  241.36    6.12
   0   4  27  228.80    6.70
   0  -4 -27  230.41    6.49
   0   4  28   73.14    3.35
   0  -4  28   80.70    3.03
   0  -4 -28   77.34    3.29
   0  -4 -29  202.58    5.86
   0  -4  29  213.09    5.53
   0   4  29  198.51    5.99
   0  -4 -30  377.88    9.02
   0  -4  30  380.37    8.53
   0   4 -30  389.57    9.31
   0   4 -31  178.81    5.38
   0  -4 -31  177.56    5.20
   0  -4  31  165.50    4.70
   0  -4 -32   32.19    1.90
   0   4 -32   31.66    2.01
   0  -4  32   34.07    1.78
   0   4 -33   21.70    1.65
   0  -4 -33   20.51    1.49
   0  -4  33   21.06    1.36
   0   4 -34   43.33    2.20
   0  -4 -34   42.47    2.08
   0  -4  34   40.81    1.83
   0  -4 -35   13.28    1.12
   0  -4  35   11.71    0.94
   0   4 -35   11.55    1.15
   0   4 -36    5.79    0.82
   0  -4  36    4.75    0.61
   0  -4 -36    5.86    0.76
   0   4 -37   79.93    2.67
   0  -4 -37   79.55    2.53
   0  -4 -38   80.58    2.44
   0   4 -38   81.18    2.59
   0   4 -39   25.72    1.25
   0  -4 -39   23.74    1.09
   0  -4 -40    9.52    0.57
   0   4 -40   13.27    0.79
   0   4 -41   36.40    1.18
   0   5   0    0.19    0.37
   0  -5   0    0.06    0.35
   0   5  -1    0.05    0.35
   0   5   1    0.28    0.38
   0  -5   1    0.13    0.43
   0  -5   1    0.69    0.41
   0  -5   2   82.01    2.77
   0  -5   2   78.78    2.92
   0   5   2   82.98    2.81
   0   5  -3    1.03    0.43
   0  -5   3    0.20    0.43
   0  -5   3    0.11    0.35
   0   5   3    0.18    0.36
   0  -5   4   20.74    1.41
   0   5   4   20.03    1.32
   0  -5   4   18.99    1.21
   0  -5   5    5.53    0.69
   0   5   5    4.91    0.72
   0   5   6    6.32    0.80
   0  -5   6    5.89    0.70
   0  -5   6    6.00    0.83
   0  -5   7   42.46    2.05
   0   5   7   44.92    2.04
   0  -5   7   39.31    1.79
   0  -5   8    9.51    1.00
   0   5  -8    7.35    0.76
   0  -5   8   10.52    0.92
   0   5   8    9.78    1.01
   0  -5   9   28.89    1.66
   0  -5   9   27.42    1.47
   0   5   9   27.84    1.64
   0  -5  10  274.08    6.52
   0  -5 -10  253.33    6.64
   0   5  10  271.81    6.62
   0  -5 -11    0.84    0.53
   0  -5  11    1.06    0.57
   0   5 -11    0.85    0.51
   0   5  11    0.49    0.52
   0  -5  12  621.60   12.21
   0   5  12  595.21   12.39
   0   5  13  276.46    6.87
   0  -5 -13  259.69    6.83
   0  -5  13  273.42    6.58
   0  -5  14  157.84    4.49
   0  -5 -14  143.02    4.65
   0   5  14  151.37    4.65
   0   5  15  486.07   10.73
   0  -5 -15  462.00   10.78
   0  -5  16  138.31    4.19
   0   5  16  134.42    4.44
   0  -5 -16  133.92    4.51
   0   5  17  366.14    8.89
   0  -5 -17  353.59    8.84
   0  -5  17  383.58    8.46
   0   5  18  356.56    8.82
   0  -5  18  375.88    8.36
   0  -5 -18  351.22    8.80
   0   5  19  246.80    6.85
   0  -5 -19  236.67    6.76
   0   5  20   92.58    3.72
   0  -5 -20   86.37    3.62
   0  -5  20   95.89    3.36
   0   5  21    0.57    0.63
   0  -5  21    0.37    0.55
   0  -5 -21    0.05    0.51
   0  -5 -22    0.05    0.47
   0  -5  22   -0.37    0.58
   0   5  22    0.16    0.51
   0  -5 -23   71.42    3.18
   0   5  23   70.18    3.28
   0  -5  23   75.56    2.90
   0  -5  24    4.00    0.80
   0  -5 -24    3.65    0.81
   0   5  24    4.15    0.86
   0  -5 -25   55.48    2.73
   0  -5  25   59.19    2.49
   0   5  25   51.62    2.79
   0  -5  26    0.14    0.52
   0  -5 -26    0.22    0.49
   0  -5  27    9.82    1.01
   0  -5 -27   10.55    1.16
   0  -5  28    1.14    0.54
   0  -5 -28    1.19    0.60
   0  -5 -29   16.43    1.33
   0  -5  29   16.14    1.19
   0   5 -30   -0.19    0.52
   0  -5 -30    0.28    0.46
   0  -5  30    0.08    0.43
   0   5 -31   72.15    2.82
   0  -5 -31   72.39    2.69
   0  -5  31   72.78    2.43
   0  -5 -32   46.93    1.98
   0  -5  32   43.09    1.72
   0   5 -32   46.92    2.13
   0   5 -33   16.40    1.23
   0  -5 -33   16.66    1.10
   0  -5  33   16.65    0.97
   0   5 -34    4.29    0.67
   0  -5  34    2.97    0.43
   0  -5 -34    3.49    0.53
   0   5 -35    6.66    0.71
   0  -5  35    4.21    0.42
   0   5 -36   29.75    1.32
   0   5 -37   12.93    0.76
   0   5 -38    2.13    0.30
   0  -6   0  157.11    4.79
   0  -6   0  183.54    4.80
   0  -6   1   -0.03    0.54
   0  -6   1    0.71    0.69
   0  -6  -1   -0.48    0.58
   0  -6  -1    0.49    0.65
   0  -6   2  357.55    8.32
   0  -6  -2  333.63    8.30
   0  -6   3   45.33    2.27
   0  -6  -3   42.64    2.24
   0  -6   4  285.14    6.54
   0  -6   4  259.77    6.63
   0  -6   5  407.39    8.59
   0  -6   5  377.16    8.74
   0  -6   6  101.06    3.52
   0  -6   6  106.64    3.40
   0   6   6  108.42    3.62
   0  -6   7   39.25    2.06
   0   6   7   42.22    2.14
   0  -6   8  221.33    5.87
   0   6   8  244.27    6.17
   0  -6   9   14.46    1.26
   0   6   9   16.22    1.35
   0   6  10   25.83    1.72
   0  -6  10   23.41    1.58
   0  -6  11   94.70    3.33
   0   6  11  101.38    3.63
   0  -6  12    3.83    0.78
   0   6  12    4.13    0.79
   0   6  13   24.68    1.73
   0  -6  13   24.65    1.59
   0   6  14   27.40    1.84
   0  -6  14   26.58    1.65
   0  -6  15   38.22    1.99
   0   6  15   38.25    2.19
   0  -6  16   -0.03    0.50
   0   6  16    0.37    0.49
   0   6  17   39.30    2.25
   0  -6  17   40.38    2.02
   0  -6  18    4.35    0.78
   0   6  18    4.95    0.88
   0  -6  19   22.10    1.47
   0  -6  20   63.75    2.53
   0  -6  21    2.92    0.69
   0  -6  22   85.28    2.92
   0  -6  23    2.26    0.59
   0  -6  24    5.06    0.72
   0  -6  25   22.97    1.32
   0  -6  26    0.16    0.38
   0  -6  27   12.07    0.89
   0   6 -28    0.56    0.45
   0  -6  28    0.86    0.37
   0  -6  29    3.00    0.43
   0   6 -29    3.55    0.64
   0   6 -30    0.74    0.41
   0  -6  30    0.40    0.26
   0   6 -31    3.29    0.51
   0   6 -32    8.65    0.68
   0   6 -33   11.93    0.69
   0  -7   0   -0.39    0.61
   0  -7  -1   11.69    1.11
   0  -7   1   11.20    1.09
   0  -7  -2   48.11    2.22
   0  -7   2   48.46    2.17
   0  -7  -3   97.88    3.37
   0  -7   3   99.00    3.25
   0  -7  -4  190.65    5.25
   0  -7   4  200.39    5.11
   0  -7  -5    8.10    1.05
   0  -7   5    9.27    0.97
   0  -7   6    8.72    0.94
   0  -7  -6    9.05    1.11
   0  -7   7   38.55    1.87
   0  -7  -7   36.02    1.98
   0  -7   8   75.73    2.69
   0  -7  -8   71.55    2.90
   0  -7  -9  203.42    5.49
   0  -7   9  198.66    5.05
   0  -7 -10    1.76    0.72
   0  -7  10    1.87    0.60
   0  -7 -11  116.73    3.81
   0  -7  11  113.58    3.43
   0  -7 -12   12.65    1.20
   0  -7  12   12.20    1.07
   0  -7 -13  122.03    3.93
   0  -7  13  123.18    3.53
   0  -7  14    6.86    0.82
   0  -7  15   39.46    1.75
   0  -7  16    2.43    0.57
   0  -7  17   52.57    1.98
   0  -7  18    0.99    0.44
   0  -7  19   58.49    2.03
   0  -7  20    5.81    0.63
   0  -7  21    7.93    0.68
   0  -7  22   24.09    1.10
   0  -7  23    9.27    0.64
   0  -7  24    4.93    0.44
   0   7 -25    5.15    0.57
   0   7 -26    0.34    0.27
   0  -7 -26    0.21    0.31
   0   7 -27   22.33    0.95
   0  -7 -27   25.93    1.04
   0  -7 -28   17.64    0.77
   0  -8   0   10.68    0.84
   0  -8  -1    1.12    0.44
   0  -8   1    0.56    0.36
   0  -8   2    8.48    0.74
   0  -8  -2    9.51    0.81
   0  -8   3    3.94    0.56
   0  -8  -3    4.62    0.60
   0  -8   4    9.39    0.76
   0  -8  -4   10.31    0.84
   0  -8   5   44.94    1.65
   0  -8  -5   46.56    1.79
   0  -8   6    0.22    0.33
   0  -8  -6    0.28    0.42
   0  -8   7   19.41    1.02
   0  -8  -7   21.53    1.18
   0  -8  -8    0.47    0.40
   0  -8   8    0.34    0.31
   0  -8  -9    4.17    0.60
   0  -8   9    4.35    0.50
   0  -8  10    8.64    0.65
   0  -8 -10    9.62    0.80
   0  -8  11    0.71    0.30
   0  -8 -11    0.57    0.41
   0  -8  12   19.05    0.89
   0  -8 -12   21.70    1.12
   0  -8 -13    0.96    0.41
   0  -8  13    0.62    0.28
   0  -8  14   53.39    1.56
   0  -8 -14   65.88    1.96
   0  -8 -15    0.28    0.33
   0  -8  15    0.18    0.20
   0  -8 -16    4.98    0.51
   0  -8 -17    0.26    0.26
   0  -8 -18    0.17    0.22
   0  -8 -19    2.02    0.29
   1   0   0    2.18    0.27
   1   0  -1 9382.00  155.17
   1   0   1 9314.81  155.08
   1   0  -2 7300.78  121.25
  -1   0   2 7279.16  120.75
  -1   0  -2 7305.76  120.77
   1   0  -2 7286.31  121.19
   1   0   2 7275.24  121.09
   1   0  -2 7353.23  121.14
  -1   0   2 7287.51  120.73
   1   0  -2 7288.93  120.76
  -1   0   3 5830.63    6.52
   1   0   3 5834.00    9.07
   1   0  -3 5858.54   11.53
   1   0  -3 5831.29   11.14
   1   0  -4 9586.53  161.24
  -1   0   4 9659.71  160.80
   1   0  -4 9603.37  160.81
   1   0   4 9351.65  160.79
   1   0  -4 9555.60  161.24
   1   0   4 9307.02  160.89
  -1   0   5 1327.55   22.26
   1   0   5 1297.20   22.26
  -1   0  -5 1325.83   22.29
   1   0  -5 1352.69   22.70
   1   0  -5 1318.76   22.27
   1   0   5 1322.38   22.27
   1   0  -5 1314.49   22.70
  -1   0  -6 5277.62   84.94
  -1   0   6 5127.41   84.91
   1   0  -6 5224.69   85.35
   1   0   6 5013.81   84.89
   1   0  -6 5218.84   85.36
   1   0  -6 4987.01   84.90
   1   0   6 5004.79   84.82
   1   0   7    1.86    0.22
  -1   0  -7    2.19    0.27
   1   0   7    2.26    0.27
   1   0  -7    1.45    0.33
   1   0  -7    1.80    0.41
   1   0  -7    3.18    0.29
  -1   0   7    2.63    0.29
   1   0   8   25.67    0.95
   1   0   8   25.44    0.79
   1   0  -8   22.00    1.05
   1   0  -8   29.55    0.95
  -1   0  -8   24.65    0.89
  -1   0   8   29.66    0.97
   1   0   8   27.09    0.93
   1   0  -9    2.75    0.32
   1   0   9    2.18    0.24
  -1   0   9    1.99    0.31
  -1   0  -9    2.33    0.31
   1   0   9    3.41    0.39
   1   0   9    2.82    0.33
   1   0 -10   24.18    0.96
   1   0  10   23.63    0.99
  -1   0  10   30.34    1.10
  -1   0 -10   27.72    1.03
   1   0  10   27.36    1.03
   1   0  11  363.62    7.22
   1   0 -11  386.49    7.22
   1   0  11  382.15    7.27
  -1   0  11  396.72    7.32
  -1   0 -11  370.86    7.19
   1   0 -12  110.58    3.16
  -1   0  12  121.19    2.97
   1   0  12  119.29    2.91
   1   0  12  122.82    2.94
  -1   0 -12  116.76    2.86
   1   0 -12  118.88    2.85
   1   0 -13  169.33    4.25
  -1   0  13  179.55    4.03
   1   0  13  174.15    3.95
  -1   0 -13  167.55    3.89
   1   0 -13  169.57    3.89
   1   0  13  177.70    3.93
  -1   0  14 1379.83   23.59
   1   0 -14 1327.45   23.33
   1   0  14 1311.92   23.45
  -1   0 -14 1295.79   23.34
   1   0 -14 1352.74   23.87
   1   0  14 1359.45   23.42
  -1   0 -15  140.09    3.53
   1   0  15  146.55    3.60
   1   0 -15  145.28    3.56
   1   0  15  146.88    3.67
  -1   0  15  143.57    3.69
  -1   0  16   61.03    2.14
   1   0  16   55.99    2.03
   1   0 -16   58.09    2.23
   1   0 -16   55.84    1.95
   1   0  16   58.65    2.02
  -1   0 -16   59.04    1.99
  -1   0  17 1314.35   22.80
   1   0  17 1254.67   22.53
   1   0 -17 1273.88   22.44
  -1   0 -17 1259.81   22.43
   1   0  17 1210.59   22.56
   1   0  18  282.45    6.28
  -1   0 -18  273.02    6.09
  -1   0  18  290.38    6.39
   1   0 -18  272.48    6.09
   1   0  18  272.78    6.16
   1   0 -19    6.61    0.95
  -1   0  19    8.74    0.85
   1   0  19    9.15    0.84
   1   0 -19    6.82    0.74
   1   0  19    7.30    0.80
  -1   0 -19    7.60    0.79
   1   0  20  235.69    5.85
   1   0  20  253.51    5.84
  -1   0  20  250.76    6.01
   1   0 -20  245.19    5.74
   1   0 -20  243.82    6.23
  -1   0 -20  242.41    5.74
   1   0 -21  130.49    3.67
  -1   0  21  123.78    3.83
   1   0 -21  130.51    4.07
   1   0  21  113.56    3.65
   1   0  21  129.12    3.73
  -1   0 -21  117.32    3.56
   1   0 -22   36.86    2.10
   1   0  22   38.58    1.91
  -1   0 -22   37.67    1.85
   1   0 -22   37.96    1.85
   1   0 -22   39.90    2.15
  -1   0 -23  344.48    7.90
   1   0 -23  351.36    7.88
   1   0  23  360.95    7.93
   1   0 -23  354.75    8.46
   1   0  23  342.12    7.99
   1   0 -23  338.49    7.85
   1   0  23  342.40    7.85
  -1   0  23  354.95    8.01
   1   0 -23  349.61    8.01
  -1   0 -23  346.29    7.87
  -1   0  24    1.08    0.52
  -1   0 -24    1.27    0.50
   1   0  24    0.56    0.56
  -1   0 -24    0.79    0.46
   1   0 -24    1.07    0.49
   1   0  24    0.97    0.48
  -1   0 -24    0.60    0.46
  -1   0  24    1.10    0.58
   1   0  24    0.88    0.51
   1   0 -24    1.46    0.71
   1   0 -24    0.45    0.65
   1   0 -24    1.83    0.70
   1   0 -24    0.90    0.51
  -1   0  25   60.73    2.62
   1   0 -25   61.44    2.60
   1   0 -25   62.68    2.79
   1   0 -25   59.39    2.65
   1   0  25   63.68    2.62
   1   0 -25   62.17    2.95
  -1   0 -25   59.20    2.53
   1   0 -25   64.20    2.63
   1   0  25   62.21    2.60
   1   0  25   58.86    2.65
   1   0 -25   61.91    2.94
  -1   0  25   65.75    2.87
  -1   0 -25   63.05    2.63
  -1   0 -25   60.88    2.60
   1   0 -26   77.61    3.34
   1   0  26   73.51    2.93
   1   0  26   73.99    3.04
   1   0 -26   71.24    3.07
   1   0 -26   71.33    3.24
  -1   0 -26   73.45    2.97
   1   0 -26   85.56    3.23
   1   0 -26   73.62    2.93
  -1   0 -26   69.80    2.86
  -1   0  26   75.25    2.98
   1   0  26   74.02    2.92
   1   0 -26   70.77    2.92
  -1   0 -26   68.49    2.86
  -1   0  27    7.81    1.00
   1   0 -27    5.73    1.05
  -1   0 -27    7.35    0.98
  -1   0 -27    7.14    0.94
   1   0  27    7.03    0.97
   1   0  27    6.89    1.01
  -1   0 -27    6.88    0.94
   1   0 -27    8.23    1.18
   1   0 -27    7.30    0.96
   1   0 -27    7.28    1.01
   1   0  27    6.63    0.98
   1   0 -27    6.66    0.94
   1   0 -27    7.23    1.08
   1   0 -28   33.22    2.01
  -1   0 -28   30.61    1.87
   1   0  28   32.92    1.94
   1   0 -28   32.39    1.94
  -1   0  28   33.43    1.99
   1   0 -28   35.64    2.32
  -1   0 -28   34.38    2.05
   1   0 -28   33.41    2.08
  -1   0 -28   35.94    2.04
   1   0  28   32.97    2.05
   1   0  28   34.33    1.96
   1   0 -28   30.83    2.01
   1   0 -29  136.10    4.49
  -1   0  29  126.24    4.08
   1   0  29  130.80    4.49
   1   0  29  130.29    4.31
   1   0 -29  140.31    4.48
   1   0 -29  138.59    4.59
   1   0 -29  139.38    4.46
  -1   0 -29  122.15    4.26
  -1   0 -29  132.77    4.44
   1   0 -29  137.95    4.90
   1   0  29  137.55    4.32
  -1   0  29  137.30    4.42
  -1   0 -29  133.13    4.38
   1   0  30    1.44    0.69
  -1   0 -30    0.63    0.51
  -1   0 -30    2.31    0.67
   1   0 -30    1.04    0.60
   1   0 -30    0.89    0.78
   1   0 -30    1.61    0.59
  -1   0  30    1.71    0.70
   1   0  30    0.20    0.56
  -1   0 -30    0.32    0.57
   1   0 -30    1.01    0.59
   1   0 -30    1.45    0.63
  -1   0  30    0.82    0.47
  -1   0 -31  193.18    5.71
  -1   0 -31  199.07    5.76
   1   0 -31  222.32    6.10
  -1   0 -31  202.01    5.70
  -1   0  31  176.22    5.27
  -1   0  31  195.48    5.68
   1   0  31  184.17    5.55
   1   0 -31  198.82    5.78
   1   0  31  200.88    5.62
   1   0 -31  200.49    5.72
   1   0 -31  204.14    5.80
   1   0 -32    6.78    1.02
   1   0  32    5.66    0.92
   1   0 -32    6.81    0.98
  -1   0  32    5.61    0.83
  -1   0  32    6.54    1.01
   1   0 -32    6.29    1.02
  -1   0 -32    5.81    0.92
   1   0  32    5.35    0.99
  -1   0 -32    5.17    0.93
  -1   0 -32    6.11    0.94
   1   0 -32    6.31    0.97
   1   0 -33   17.80    1.52
  -1   0 -33   15.31    1.44
  -1   0  33   14.03    1.37
  -1   0 -33   15.44    1.43
  -1   0  33   15.85    1.34
  -1   0 -33   16.97    1.49
   1   0 -33   16.22    1.47
   1   0  33   14.66    1.38
   1   0 -33   18.34    1.63
   1   0 -33   15.60    1.40
   1   0 -34   38.88    2.23
  -1   0  34   33.49    2.05
  -1   0 -34   40.43    2.23
   1   0 -34   40.37    2.34
  -1   0 -34   36.47    2.17
   1   0 -34   39.32    2.25
  -1   0  34   31.75    1.91
   1   0  34   36.24    2.08
  -1   0 -34   41.18    2.29
   1   0 -34   37.79    2.06
   1   0 -35  163.71    5.09
   1   0 -35  154.97    4.82
  -1   0 -35  149.55    4.80
  -1   0 -35  151.44    4.73
   1   0 -35  149.43    4.44
   1   0  35  147.61    4.58
  -1   0  35  140.26    4.57
  -1   0  36  202.21    5.75
   1   0 -36  226.53    6.06
  -1   0 -36  223.67    5.93
  -1   0 -36  214.47    5.95
   1   0 -36  224.82    6.23
   1   0  36  209.22    5.74
   1   0 -37    0.52    0.58
   1   0  37    0.44    0.57
  -1   0 -37    0.31    0.54
  -1   0  37    0.45    0.58
  -1   0 -37    0.24    0.55
   1   0 -37    0.28    0.55
   1   0  38   79.46    2.98
  -1   0  38   78.85    3.00
   1   0 -38   86.31    3.19
   1   0  38   76.73    2.83
   1   0 -38   92.40    3.38
  -1   0 -38   86.38    3.18
  -1   0 -38   86.78    3.10
   1   0  39    4.70    0.69
   1   0 -39    5.05    0.85
  -1   0  39    3.79    0.74
  -1   0 -39    4.15    0.70
   1   0  39    4.01    0.73
   1   0 -39    4.98    0.80
  -1   0 -39    4.86    0.81
   1   0  40    5.94    0.70
  -1   0  40    5.10    0.78
   1   0 -40    8.80    1.00
  -1   0 -40    7.06    0.87
  -1   0 -40    6.34    0.79
   1   0  40    6.57    0.83
   1   0 -40    6.67    0.86
  -1   0 -41   27.40    1.41
   1   0  41   24.53    1.40
   1   0 -41   30.35    1.56
  -1   0  41   25.24    1.40
   1   0 -41   29.77    1.60
   1   0  41   26.31    1.30
  -1   0 -41   27.88    1.49
  -1   0 -42   12.07    0.92
  -1   0  42   10.25    0.87
   1   0  42   11.25    0.90
   1   0 -42   13.77    0.98
   1   0  42   11.37    0.76
  -1   0 -42   12.68    0.88
   1   0 -42   13.86    1.04
  -1   0  43    4.97    0.57
  -1   0 -43    5.55    0.53
   1   0 -43    6.28    0.63
   1   0 -43    7.67    0.72
   1   0  43    6.32    0.66
  -1   0 -43    5.90    0.61
  -1   0  44    3.32    0.40
   1   0 -44    4.38    0.44
  -1   0 -44    3.68    0.42
  -1   0 -44    2.28    0.28
   1   0 -44    3.64    0.48
   1   0  44    3.20    0.41
   1   0 -45    0.17    0.19
   1  -1  44   13.62    0.71
  -1  -1 -44   13.78    0.73
   1   1 -44   13.74    0.72
   1  -1  43    1.25    0.37
   1  -1  43    1.06    0.30
   1   1 -43    1.49    0.36
   1   1 -43    1.28    0.39
  -1  -1 -43    0.63    0.21
  -1  -1 -43    0.97    0.32
  -1   1  43    0.97    0.35
  -1  -1 -42    2.57    0.42
   1   1 -42    3.56    0.59
  -1   1  42    2.72    0.52
   1   1 -42    3.65    0.55
   1  -1  42    3.61    0.55
   1  -1  42    3.25    0.49
  -1  -1 -42    3.04    0.53
   1   1 -41   63.39    2.35
  -1  -1 -41   58.42    2.18
  -1  -1 -41   52.98    1.96
   1  -1  41   56.86    2.05
  -1   1  41   53.79    2.11
   1   1 -41   63.09    2.27
   1  -1  41   56.61    2.10
  -1  -1 -40   52.95    2.18
  -1  -1 -40   50.53    2.01
  -1   1  40   45.72    2.05
   1   1 -40   53.58    2.19
   1   1 -40   53.53    2.28
   1  -1  40   50.07    2.06
   1   1 -39   45.31    2.21
  -1  -1 -39   44.17    2.11
   1  -1  39   45.40    2.03
  -1  -1 -39   43.03    1.95
  -1   1  39   40.15    2.01
   1   1 -39   48.59    2.20
  -1  -1 -38   35.70    1.94
   1   1 -38   36.16    1.97
   1   1 -38   37.70    2.07
   1  -1  38   33.65    1.82
  -1   1  38   33.63    1.91
  -1  -1 -38   34.98    1.83
  -1   1  37    8.90    1.09
  -1  -1 -37    8.35    1.08
  -1  -1 -37    8.57    0.99
   1  -1  37    8.66    1.02
   1   1 -37    9.02    1.12
   1   1 -37    8.02    1.02
   1   1 -36   19.75    1.62
   1  -1  36   17.47    1.40
  -1  -1 -36   18.70    1.52
   1   1 -36   19.72    1.57
  -1   1  36   16.70    1.49
  -1  -1 -36   19.47    1.47
  -1   1  35   33.03    2.07
  -1  -1 -35   35.45    2.11
   1  -1  35   31.66    1.87
  -1  -1 -35   29.57    1.87
   1   1 -35   32.62    2.07
   1   1 -35   33.70    2.04
   1   1 -34   43.11    2.42
   1   1 -34   43.21    2.36
  -1  -1 -34   43.07    2.28
  -1  -1 -34   44.11    2.38
  -1  -1 -34   43.62    2.37
  -1   1  34   37.86    2.03
  -1   1  34   39.23    2.29
   1  -1  34   42.88    2.20
   1   1 -34   41.96    2.30
   1   1 -33  228.01    6.29
   1  -1  33  231.00    6.54
   1   1 -33  233.88    6.37
  -1   1  33  204.25    5.77
  -1  -1 -33  230.56    6.19
  -1  -1 -33  232.54    6.40
  -1   1  33  230.52    6.43
   1  -1  33  224.10    5.96
   1   1 -33  236.62    6.53
  -1  -1 -33  219.84    6.27
   1  -1  32   64.50    3.01
   1   1 -32   59.71    2.81
  -1   1  32   56.21    2.84
   1  -1  32   57.73    2.62
  -1   1  32   52.23    2.46
   1   1 -32   65.36    2.99
  -1  -1 -32   57.41    2.78
  -1  -1 -32   59.99    2.73
  -1  -1 -32   61.39    2.86
   1   1 -32   61.47    2.85
   1   1 -31    8.96    1.12
  -1  -1 -31    8.93    1.14
   1   1 -31    8.71    1.12
   1   1 -31    9.41    1.27
   1   1 -31   10.37    1.33
   1   1 -31    7.19    1.07
   1  -1  31    9.55    1.20
   1  -1  31    8.54    1.05
  -1  -1 -31    9.50    1.10
  -1   1  31    8.38    1.19
  -1   1  31    8.05    0.97
  -1  -1 -31    8.63    1.10
  -1  -1 -30  151.60    4.85
   1   1 -30  149.57    4.82
  -1  -1 -30  148.36    4.71
  -1   1  30  152.94    4.97
   1  -1  30  153.20    4.60
   1   1 -30  155.03    4.86
   1   1 -30  161.66    5.28
   1  -1  30  158.91    5.03
   1   1 -30  152.15    5.18
   1   1 -30  153.07    4.95
  -1   1  30  138.58    4.38
  -1  -1 -30  150.38    4.87
   1   1 -29   22.32    1.86
  -1  -1 -29   20.95    1.57
  -1   1  29   18.69    1.40
   1   1 -29   19.93    1.61
  -1  -1 -29   20.08    1.60
   1   1 -29   18.19    1.66
   1   1 -29   20.90    1.66
  -1  -1 -29   19.09    1.58
   1  -1  29   20.56    1.51
   1  -1  29   20.31    1.64
   1   1 -29   19.59    1.58
  -1   1  29   19.48    1.65
   1  -1  28  397.87    8.90
   1   1 -28  400.74    9.18
   1   1 -28  406.83    9.35
  -1  -1 -28  395.61    9.22
   1   1 -28  394.70    9.68
  -1  -1 -28  385.54    8.98
   1   1 -28  406.41    9.77
   1   1 -28  386.13    9.21
  -1  -1 -28  397.87    9.30
  -1   1  28  365.29    8.66
   1  -1  28  404.16    9.32
  -1   1  28  398.07    9.38
  -1  -1 -27   28.60    1.80
  -1  -1 -27   19.95    1.48
   1  -1  27   19.05    1.42
   1   1 -27   17.71    1.48
  -1   1  27   21.04    1.66
   1   1 -27   18.60    1.53
   1   1 -27   19.61    1.73
   1   1 -27   19.15    1.68
  -1  -1 -27   28.39    1.80
   1   1 -27   18.28    1.50
   1  -1  27   18.25    1.52
  -1   1  27   19.35    1.40
   1  -1  26  419.13    9.36
  -1  -1 -26  406.14    9.30
   1   1 -26  433.17   10.05
   1  -1  26  423.63    9.30
  -1  -1 -26  422.81    9.61
   1   1 -26  414.96    9.56
  -1   1  26  409.72    9.10
   1   1 -26  428.90    9.64
   1   1 -26  439.54    9.58
  -1   1  26  425.77    9.75
  -1  -1 -26  410.66    9.52
   1  -1  26  437.40    9.66
   1   1 -26  441.70   10.09
  -1   1  25  235.14    5.94
   1  -1  25  239.10    6.16
  -1  -1 -25  239.35    6.28
  -1  -1 -25  236.46    6.10
  -1   1  25  242.57    6.47
  -1  -1 -25  251.45    6.36
   1   1 -25  243.97    6.71
   1  -1  25  259.00    6.40
   1   1 -25  252.80    6.34
   1   1 -25  243.46    6.37
   1  -1  25  245.92    6.10
   1   1 -25  239.14    6.30
   1   1 -25  260.95    6.83
   1  -1  24    3.57    0.69
  -1  -1 -24    3.45    0.72
   1   1 -24    5.17    0.95
  -1   1  24    3.23    0.71
   1   1 -24    3.45    0.71
   1   1 -24    3.12    0.80
   1  -1  24    4.12    0.75
  -1  -1 -24    3.26    0.71
  -1  -1 -24    3.70    0.65
  -1   1  24    2.56    0.60
  -1  -1 -23   67.14    2.70
  -1   1  23   64.72    2.72
   1   1 -23   67.82    2.94
  -1   1  23   65.78    2.55
   1  -1  23   63.49    2.58
   1   1 -23   71.16    3.02
   1   1 -23   68.53    2.70
   1  -1  23   66.74    2.61
   1   1 -23   65.71    2.67
  -1  -1 -23   64.07    2.53
  -1  -1 -23   73.62    2.77
   1   1 -23   69.30    2.74
   1  -1  23   67.89    2.57
   1   1 -22  589.08   12.41
   1  -1  22  592.92   11.85
  -1  -1 -22  584.35   11.94
   1   1 -22  577.88   11.99
   1   1 -22  600.72   12.01
   1   1 -22  586.19   12.48
   1  -1  22  593.74   11.87
   1   1 -21  200.41    5.33
  -1  -1 -21  203.33    5.20
   1   1 -21  208.36    5.67
   1  -1  21  199.26    5.09
   1   1 -21  207.40    5.23
  -1  -1 -20  310.03    7.03
   1   1 -20  327.94    7.56
   1   1 -20  306.69    7.18
   1  -1  20  309.40    7.14
   1  -1  20  316.34    6.94
  -1   1  20  292.21    7.08
   1   1 -20  329.69    7.07
   1   1 -19  750.33   13.97
   1  -1  19  741.21   13.85
  -1   1  19  743.31   14.19
   1  -1  19  731.81   14.08
  -1  -1 -19  730.33   14.00
   1  -1  18   76.58    2.60
  -1  -1 -18   76.23    2.57
   1   1 -18   78.30    2.56
   1  -1  18   77.18    2.49
   1   1 -18   75.14    2.74
  -1   1  18   76.98    2.68
   1   1 -17  628.47   11.90
   1  -1  17  607.93   11.76
   1   1 -17  612.43   12.26
  -1   1  17  619.77   12.08
  -1  -1 -17  622.45   11.96
   1  -1  17  630.02   11.98
   1  -1  16 2008.42   35.26
   1   1 -16 2056.78   35.68
   1   1 -16 2050.09   35.23
  -1   1  16 2015.61   35.16
  -1  -1 -16 2055.00   35.32
   1  -1  16 2024.71   35.07
  -1   1  16 2023.99   35.40
   1   1 -15  771.30   14.94
  -1   1  15  774.81   14.56
  -1   1  15  774.71   14.35
   1   1 -15  782.80   14.45
  -1  -1 -15  795.95   14.54
   1  -1  15  792.41   14.49
   1  -1  15  790.16   14.31
   1   1 -15  798.99   14.87
   1   1 -14 2216.77   38.18
   1  -1  14 2203.81   37.79
   1   1 -14 2208.91   38.36
   1   1 -14 2145.75   37.72
  -1   1  14 2231.68   37.93
  -1  -1 -14 2200.56   37.87
  -1   1  14 2180.15   37.68
   1  -1  14 2209.21   37.63
   1   1 -14 2210.74   37.78
   1   1 -13  765.62   14.31
   1   1 -13  786.99   13.97
  -1   1  13  749.82   13.84
  -1  -1 -13  783.48   14.05
   1  -1  13  757.42   13.92
  -1   1  13  793.15   14.10
   1   1 -13  775.68   13.90
   1  -1  13  786.67   13.84
   1   1 -12  106.69    2.83
   1   1 -12  116.84    2.84
   1  -1  12  108.36    2.74
  -1   1  12  110.27    2.88
  -1  -1 -12  109.17    2.91
  -1   1  12  114.58    2.79
   1  -1  12  107.01    2.79
   1   1 -11  611.60   11.17
  -1  -1 -11  602.12   11.24
  -1   1  11  605.17   11.04
   1  -1  11  616.83   11.04
   1  -1  11  610.06   11.12
  -1   1  11  625.77   11.23
   1   1 -11  611.83   11.13
   1   1 -11  598.09   11.46
   1  -1  10  667.88   11.80
   1   1 -10  662.07   11.95
  -1  -1 -10  653.78   12.02
   1   1 -10  673.72   11.92
   1  -1  10  651.38   11.86
  -1   1  10  685.53   11.83
   1   1  -9 2446.56   40.97
  -1   1   9 2440.70   40.86
   1   1  -9 2388.34   40.98
  -1  -1  -9 2397.92   41.07
   1  -1   9 2407.73   40.93
   1  -1   9 2414.86   40.84
   1   1  -9 2459.40   41.28
   1   1  -8 2382.20   40.12
   1  -1   8 2415.92   40.11
   1  -1   8 2375.00   39.99
  -1  -1  -8 2377.13   40.21
  -1   1   8 2362.72   40.02
   1   1  -8 2405.75   40.46
   1   1  -8 2321.77   40.15
   1   1  -7 2953.14   50.38
   1  -1   7 3040.28   50.25
  -1   1   7 3023.53   50.28
   1   1  -7 3059.86   50.69
   1   1  -7 2968.46   50.76
   1  -1   7 3032.94   50.37
   1   1  -7 2986.14   50.35
  -1  -1  -7 2925.26   50.40
   1  -1   6 2788.23   46.52
  -1   1   6 2786.47   46.46
   1  -1   6 2831.14   46.42
  -1  -1  -6 2803.96   46.57
   1   1  -6 2794.85   46.57
   1   1  -6 2788.49   46.53
   1   1  -5 4374.97   72.48
   1  -1   5 4408.59   72.36
  -1   1   5 4387.30   72.40
   1  -1   5 4402.92   72.44
   1   1  -5 4316.55   72.44
   1   1  -4 8684.77  141.86
   1  -1   4 8682.08  141.87
  -1   1   4 8898.79  141.84
   1   1  -4 8777.07  141.84
   1   1  -3  772.26   13.44
   1  -1   3  795.69   13.46
  -1  -1  -3  790.35   13.35
   1   1  -3  774.06   13.43
  -1   1   3  785.43   13.43
  -1   1   2 3036.05   50.44
   1   1  -2 3058.92   50.44
   1  -1   2 2980.64   50.44
   1   1  -2 3043.08   50.45
  -1  -1  -2 3007.86   50.38
   1  -1   2 3011.69   50.36
   1   1  -1 2744.35   45.90
   1   1  -1 2709.82   45.90
  -1   1   1 2758.81   45.90
  -1  -1  -1 2771.45   45.86
   1  -1   1 2749.26   45.89
   1  -1   1 2793.62   45.94
   1   1  -1 2706.76   46.25
  -1   1   1 2741.57   45.91
   1  -1   0 9748.70  160.58
   1   1   0 9829.34  160.94
  -1  -1   0 9816.89  160.58
   1   1   0 9871.56  160.60
  -1   1   0 9999.00  160.61
   1  -1   0 9748.40  160.73
   1   1   0 9920.26  160.62
   1  -1  -1 2808.91   46.56
   1   1   1 2750.81   46.64
  -1   1  -1 2829.04   46.36
  -1  -1   1 2781.04   46.33
   1   1   1 2747.25   46.34
   1  -1  -1 2790.75   46.29
   1  -1  -1 2755.31   46.40
  -1   1  -1 2760.03   46.33
   1  -1  -1 2781.09   46.15
   1   1   1 2749.76   46.35
  -1   1  -2 3038.79   50.24
  -1   1  -2 3005.25   50.24
   1  -1  -2 2988.01   50.53
   1   1   2 3040.95   50.54
   1  -1  -2 2986.88   50.39
   1   1   2 3049.75   50.25
  -1  -1   2 2985.75   50.25
   1  -1  -2 2992.52   50.18
   1   1   3  771.40   13.48
   1   1   3  784.64   13.24
  -1   1  -3  778.30   13.24
   1  -1  -3  757.29   13.45
  -1  -1   3  773.89   13.25
  -1   1  -3  772.37   13.23
   1  -1  -3  776.07   13.55
   1  -1  -3  759.58   13.14
   1  -1  -4 8963.29  145.71
  -1   1  -4 8926.01  145.38
   1   1   4 9021.21  145.57
  -1  -1   4 8955.73  145.37
  -1   1  -4 8961.53  145.35
   1   1   4 8910.65  145.34
  -1   1  -5 4429.65   72.94
  -1  -1   5 4380.63   72.93
   1  -1  -5 4271.83   73.24
   1   1   5 4347.23   73.11
   1  -1  -5 4372.63   73.32
   1   1   5 4408.32   72.90
  -1   1  -5 4362.34   72.98
   1  -1  -6 2855.33   47.79
   1   1   6 2821.08   47.54
  -1   1  -6 2855.32   47.44
  -1  -1   6 2877.20   47.43
   1  -1  -6 2763.58   47.45
   1   1   6 2821.40   47.35
   1  -1  -6 2794.69   47.81
  -1   1  -6 2826.51   47.48
  -1  -1   7 2828.12   50.13
   1  -1  -7 3020.52   50.52
  -1   1  -7 3007.54   50.16
   1  -1  -7 2976.35   50.49
   1   1   7 3024.63   50.03
   1   1   7 2987.38   50.18
  -1   1  -7 3012.00   50.13
   1  -1  -7 3026.67   50.14
  -1   1  -8 2403.18   40.34
   1   1   8 2402.89   40.22
   1  -1  -8 2368.27   40.38
  -1  -1   8 2398.88   40.32
  -1   1  -8 2353.41   40.37
   1   1   8 2382.22   40.35
   1  -1  -8 2419.46   40.75
   1   1   9 2391.58   40.51
   1   1   9 2388.21   40.40
   1  -1  -9 2392.45   40.59
  -1  -1   9 2375.23   40.51
  -1   1  -9 2396.35   40.58
   1  -1  -9 2445.13   40.93
  -1   1  -9 2396.06   40.54
  -1   1 -10  663.50   11.92
  -1   1 -10  659.00   11.95
   1   1  10  658.60   11.76
   1  -1 -10  679.98   12.30
  -1  -1  10  640.66   11.87
   1  -1 -10  674.44   11.97
   1   1  11  607.35   11.08
  -1   1 -11  622.17   11.22
  -1   1 -11  599.82   11.24
   1  -1 -11  624.39   11.63
  -1  -1  11  609.42   11.19
   1  -1 -11  620.25   11.29
   1   1  11  626.75   11.26
  -1  -1  12  109.07    2.85
   1   1  12  105.59    2.74
  -1   1 -12  113.02    2.87
   1   1  12  113.81    2.91
   1  -1 -12  111.97    2.93
  -1   1 -12  108.37    2.89
  -1   1 -13  771.24   14.24
  -1   1 -13  799.60   14.33
   1  -1 -13  797.76   14.76
   1   1  13  803.20   14.18
   1  -1 -13  781.34   14.33
  -1  -1  13  784.82   14.30
   1   1  13  782.86   14.35
   1   1  14 2207.33   38.09
  -1   1 -14 2230.77   38.03
  -1   1 -14 2241.56   37.97
  -1  -1  14 2245.88   38.07
   1  -1 -14 2220.52   38.07
   1  -1 -14 2135.91   38.46
   1   1  14 2196.39   37.85
   1  -1 -15  783.37   14.69
   1   1  15  814.12   14.56
  -1   1 -15  790.08   14.68
   1  -1 -15  823.14   15.15
   1   1  15  782.37   14.75
  -1  -1  15  804.29   14.70
   1   1  16 1985.65   35.10
   1  -1 -16 2106.66   35.82
   1   1  16 2027.45   35.41
   1  -1 -16 2043.80   35.33
  -1   1 -16 2026.98   35.27
  -1  -1  16 2046.01   35.36
   1  -1 -17  616.68   11.77
   1  -1 -17  644.08   12.24
  -1   1 -17  616.97   11.76
  -1  -1  17  627.66   11.85
   1   1  17  610.97   11.86
  -1   1 -18   76.08    2.51
  -1  -1  18   78.74    2.61
   1   1  18   70.93    2.55
   1  -1 -18   68.90    2.72
   1   1  18   71.94    2.53
   1  -1 -18   73.19    2.49
   1   1  19  736.11   14.34
   1  -1 -19  760.61   14.30
  -1  -1  19  781.70   14.53
  -1   1 -19  757.64   14.27
   1  -1 -20  328.52    7.14
  -1  -1  20  327.59    7.35
   1   1  20  319.92    7.22
  -1   1 -20  318.04    7.10
   1   1  21  209.70    5.39
   1  -1 -21  200.51    5.21
  -1   1 -21  204.54    5.20
   1  -1 -22  601.60   12.52
   1   1  22  594.11   12.09
   1  -1 -22  583.56   12.13
   1  -1 -22  589.87   12.43
   1   1  22  563.48   11.82
  -1   1 -22  600.21   11.95
   1  -1 -22  586.84   11.94
   1   1  23   67.89    2.71
   1  -1 -23   66.21    2.67
   1  -1 -23   67.93    2.80
   1  -1 -23   70.60    2.76
  -1   1 -23   68.62    2.70
   1  -1 -23   71.94    3.07
   1  -1 -23   65.75    2.94
  -1  -1  23   68.30    2.64
  -1   1 -23   67.61    2.72
   1   1  23   78.03    2.91
   1   1  24   10.67    1.06
  -1  -1  24   17.06    1.26
  -1   1 -24   17.98    1.34
  -1   1 -24    3.52    0.70
   1  -1 -24    3.56    0.72
   1   1  24    3.55    0.72
   1  -1 -24    4.42    0.91
   1  -1 -24    2.26    0.82
   1  -1 -24    3.02    0.68
  -1   1 -24   15.60    1.27
   1  -1 -24    2.46    0.60
   1   1  25  247.50    6.42
   1  -1 -25  248.10    6.34
   1  -1 -25  257.38    6.77
   1   1  25  232.58    6.24
   1  -1 -25  249.33    6.50
   1  -1 -25  237.65    6.26
  -1  -1  25  248.08    6.20
  -1   1 -25  243.93    6.31
   1  -1 -25  249.56    6.85
  -1   1 -25  246.68    6.29
  -1   1 -25  244.46    6.33
   1   1  26  397.07    9.51
  -1   1 -26  431.07    9.63
  -1  -1  26  457.62    9.67
   1  -1 -26  416.88    9.58
   1  -1 -26  420.34    9.97
  -1   1 -26  419.46    9.59
   1  -1 -26  432.05    9.85
  -1   1 -26  426.12    9.65
   1  -1 -26  438.01    9.66
   1  -1 -26  434.35   10.18
   1   1  26  432.94    9.74
  -1  -1  26  434.49    9.48
  -1  -1  27   18.44    1.47
   1  -1 -27   20.35    1.78
  -1   1 -27   19.39    1.53
   1  -1 -27   19.95    1.60
   1  -1 -27   20.05    1.73
  -1  -1  27   18.42    1.44
  -1   1 -27   19.36    1.51
   1   1  27   22.96    1.69
  -1   1 -27   17.44    1.44
   1  -1 -27   25.71    1.73
   1   1  27   20.07    1.57
   1  -1 -27   25.52    1.71
  -1   1 -28  396.81    9.28
   1  -1 -28  394.51    9.57
  -1   1 -28  391.43    9.26
   1   1  28  411.02    9.44
   1  -1 -28  407.51    9.34
  -1   1 -28  391.62    9.23
   1  -1 -28  383.20    9.42
   1  -1 -28  392.44    9.28
  -1  -1  28  429.18    9.30
  -1  -1  28  400.81    9.04
   1  -1 -29   20.29    1.60
  -1  -1  29   21.46    1.56
   1   1  29   21.84    1.70
  -1   1 -29   20.29    1.58
   1  -1 -29   20.84    1.70
   1  -1 -29   20.40    1.59
  -1   1 -29   18.57    1.54
  -1  -1  29   21.89    1.63
  -1   1 -29   20.38    1.63
   1  -1 -29   20.62    1.71
   1  -1 -30  156.62    4.88
  -1  -1  30  150.61    4.63
   1  -1 -30  152.86    5.02
  -1   1 -30  154.07    4.85
   1  -1 -30  150.72    4.86
   1  -1 -30  157.04    5.04
   1   1  30  153.68    4.90
  -1   1 -30  150.54    4.83
  -1  -1  30  149.06    4.71
  -1   1 -30  146.77    4.76
   1   1  31   10.35    1.23
   1  -1 -31   12.18    1.37
  -1  -1  31    8.49    1.04
   1  -1 -31    9.04    1.23
  -1   1 -31    7.97    1.06
   1  -1 -31    8.84    1.13
  -1   1 -31    8.23    1.08
   1  -1 -31    8.83    1.08
  -1  -1  31    8.13    1.06
  -1   1 -31    9.88    1.17
  -1  -1  32   53.66    2.57
   1  -1 -32   61.61    2.84
  -1  -1  32   56.18    2.61
  -1   1 -32   57.95    2.77
   1   1  32   55.89    2.75
  -1   1 -32   57.78    2.76
   1  -1 -32   58.49    2.87
   1  -1 -32   59.90    2.90
  -1   1 -32   57.54    2.74
   1  -1 -32   63.09    2.88
   1  -1 -33  228.44    6.29
  -1  -1  33  217.63    5.92
   1  -1 -33  233.15    6.49
   1   1  33  215.97    5.94
   1  -1 -33  220.95    6.24
   1   1  33  233.91    6.31
  -1   1 -33  221.70    6.18
  -1   1 -33  220.22    6.20
   1  -1 -33  232.74    6.31
  -1   1 -33  225.58    6.25
   1  -1 -34   42.90    2.33
   1  -1 -34   45.26    2.41
  -1   1 -34   39.48    2.28
   1   1  34   40.73    2.13
   1  -1 -34   45.95    2.52
   1   1  34   43.49    2.35
  -1  -1  34   38.90    2.13
  -1   1 -34   41.24    2.27
   1  -1 -34   43.02    2.36
  -1   1 -34   42.87    2.34
  -1  -1  34   43.41    2.23
  -1   1 -35   32.27    1.98
   1  -1 -35   32.66    2.00
   1  -1 -35   34.20    2.13
  -1   1 -35   33.20    2.04
   1  -1 -35   31.56    2.00
   1   1  35   28.67    1.91
  -1  -1  35   28.57    1.81
   1   1  35   30.46    1.80
  -1   1 -36   19.20    1.52
   1  -1 -36   19.27    1.50
  -1  -1  36   18.29    1.44
  -1   1 -36   18.96    1.52
   1   1  36   18.00    1.48
   1   1  36   17.34    1.31
   1  -1 -36   19.66    1.54
   1  -1 -36   22.18    1.70
  -1  -1  37    7.70    0.97
   1   1  37    8.56    1.06
   1   1  37    7.52    0.87
  -1   1 -37    8.42    1.05
   1  -1 -37    9.41    1.16
   1  -1 -37    8.09    0.99
   1  -1 -37    8.78    1.06
  -1   1 -37    8.33    1.02
  -1  -1  38   33.11    1.79
   1   1  38   33.15    1.66
  -1   1 -38   36.22    1.95
  -1   1 -38   35.59    1.92
   1   1  38   31.84    1.82
   1  -1 -38   35.83    2.09
   1  -1 -38   37.93    1.98
  -1   1 -39   44.86    2.06
  -1   1 -39   43.24    2.08
   1  -1 -39   50.23    2.30
   1  -1 -39   48.10    2.17
   1   1  39   39.77    1.72
   1   1  39   40.00    1.97
  -1  -1  39   40.99    1.94
  -1   1 -40   51.38    2.12
  -1   1 -40   51.30    2.15
   1  -1 -40   49.35    2.12
  -1  -1  40   45.10    1.97
   1  -1 -40   56.36    2.36
   1   1  40   47.41    2.05
   1   1  41   54.74    2.13
  -1   1 -41   59.86    2.21
   1  -1 -41   62.71    2.42
  -1   1 -41   59.30    2.16
  -1  -1  41   53.22    2.05
   1  -1 -41   62.11    2.25
  -1   1 -42    2.44    0.47
  -1   1 -42    2.38    0.49
  -1  -1  42    2.38    0.50
   1  -1 -42    2.69    0.56
   1  -1 -42    3.10    0.51
   1   1  42    2.40    0.50
  -1   1 -43    1.04    0.33
   1  -1 -43    1.61    0.43
   1   1  43    0.93    0.35
  -1   1 -43    1.64    0.35
  -1  -1  43    1.04    0.36
   1  -1 -43    1.32    0.35
  -1   1 -44   13.63    0.71
  -1   1 -44   10.01    0.57
   1  -1 -44   14.20    0.72
   1  -1 -44   17.12    0.88
  -1  -1  44   12.75    0.68
   1  -1 -45   20.74    0.83
   1  -2  43    0.30    0.23
   1   2 -43    0.10    0.21
  -1  -2 -43    0.34    0.23
   1  -2  43    0.22    0.22
   1   2 -43    0.20    0.23
   1  -2  42    5.50    0.57
   1   2 -42    6.49    0.64
   1   2 -42    6.68    0.61
  -1  -2 -42    6.21    0.59
   1  -2  42    6.28    0.59
  -1  -2 -41   44.26    1.73
   1  -2  41   42.44    1.65
   1   2 -41   46.63    1.83
   1   2 -41   45.81    1.76
  -1  -2 -40   41.14    1.79
   1   2 -40   46.05    1.93
   1   2 -40   41.28    1.79
   1  -2  40   40.26    1.71
  -1  -2 -40   33.39    1.46
  -1   2  40   36.64    1.75
   1   2 -39   18.47    1.31
   1  -2  39   14.71    1.09
  -1  -2 -39   16.09    1.19
  -1  -2 -39   14.51    1.02
  -1   2  39   15.10    1.20
   1   2 -39   16.27    1.19
  -1  -2 -38   31.75    1.75
  -1   2  38   27.42    1.70
  -1  -2 -38   29.27    1.57
   1  -2  38   29.40    1.60
   1   2 -38   33.65    1.80
   1  -2  38   30.37    1.70
   1   2 -38   32.76    1.83
   1  -2  37   41.51    2.09
   1  -2  37   39.30    1.94
   1   2 -37   42.66    2.16
   1   2 -37   41.93    2.17
  -1   2  37   40.18    2.15
  -1  -2 -37   42.39    2.12
  -1  -2 -37   42.03    1.97
   1   2 -36   65.02    2.80
  -1  -2 -36   59.57    2.52
  -1   2  36   60.18    2.80
   1   2 -36   63.39    2.78
   1  -2  36   62.29    2.70
  -1  -2 -36   63.16    2.74
   1  -2  36   60.05    2.52
   1  -2  35    6.61    0.95
   1   2 -35    6.99    1.00
  -1  -2 -35    6.30    0.89
  -1   2  35    6.81    1.09
   1  -2  35    8.45    1.12
   1   2 -35    6.06    0.96
  -1  -2 -35    5.77    0.92
  -1   2  34  102.11    3.94
   1   2 -34  106.30    3.85
   1  -2  34  103.59    3.57
   1   2 -34  107.67    3.91
  -1  -2 -34  105.49    3.65
  -1  -2 -34  104.52    3.81
   1  -2  34  104.92    3.72
   1  -2  33  129.24    4.35
  -1  -2 -33  122.52    4.08
   1   2 -33  129.58    4.36
   1   2 -33  130.28    4.42
   1  -2  33  128.67    4.07
   1   2 -33  130.64    4.36
  -1   2  33  123.24    4.48
   1  -2  33  117.20    4.11
  -1  -2 -33  129.37    4.38
  -1  -2 -32   27.08    1.78
   1  -2  32   27.85    1.90
  -1   2  32   28.48    2.08
   1   2 -32   27.42    1.88
   1  -2  32   28.17    1.79
   1   2 -32   23.64    1.83
   1   2 -32   30.87    2.03
   1   2 -32   27.86    1.93
   1  -2  32   26.08    1.82
  -1  -2 -32   29.25    1.97
  -1   2  31    8.86    1.29
   1  -2  31   10.27    1.15
  -1  -2 -31   10.23    1.22
   1   2 -31   12.35    1.32
   1   2 -31   10.77    1.22
   1  -2  31   11.63    1.27
   1   2 -31   11.88    1.32
  -1  -2 -31   10.16    1.12
   1   2 -31   10.67    1.31
   1   2 -31   10.71    1.30
  -1   2  30   33.23    2.26
   1   2 -30   34.28    2.20
   1   2 -30   34.43    2.14
  -1  -2 -30   30.56    2.01
  -1  -2 -30   32.70    1.95
   1  -2  30   33.11    2.05
   1   2 -30   31.09    2.16
   1   2 -30   33.95    2.10
   1  -2  30   31.18    1.90
   1   2 -30   31.68    2.10
   1   2 -29  355.11    8.58
  -1   2  29  347.32    8.84
   1   2 -29  332.78    8.70
  -1  -2 -29  326.76    8.15
   1   2 -29  348.02    8.68
   1   2 -29  353.01    8.55
  -1  -2 -29  332.43    8.43
   1   2 -29  352.85    8.62
   1  -2  29  356.00    8.12
   1  -2  29  352.28    8.44
   1   2 -28  131.48    4.45
  -1   2  28  129.00    4.65
   1   2 -28  129.59    4.46
   1   2 -28  134.20    4.50
  -1  -2 -28  126.81    4.19
  -1  -2 -28  127.99    4.40
   1   2 -28  124.46    4.64
   1  -2  28  132.61    4.34
   1   2 -28  125.84    4.49
   1  -2  28  135.38    4.19
   1  -2  27  905.55   17.12
  -1   2  27  897.67   18.00
   1   2 -27  900.82   17.67
  -1  -2 -27  846.38   17.50
   1   2 -27  879.29   17.77
  -1  -2 -27  851.64   17.20
  -1   2  27  811.98   16.77
   1   2 -27  881.52   17.96
   1   2 -27  918.43   17.63
   1  -2  27  904.08   17.44
   1   2 -27  901.64   17.65
  -1  -2 -26   15.59    1.41
   1   2 -26   16.28    1.53
   1   2 -26   18.36    1.52
   1   2 -26   16.76    1.46
   1   2 -26   16.95    1.46
  -1  -2 -26   17.08    1.39
   1   2 -26   15.96    1.55
  -1   2  26   17.14    1.59
   1  -2  26   16.61    1.35
  -1   2  26   15.37    1.23
   1  -2  26   16.18    1.38
   1   2 -25  737.46   15.32
   1   2 -25  779.88   15.18
  -1  -2 -25  729.01   15.04
   1   2 -25  751.08   15.22
   1   2 -25  764.23   15.60
   1   2 -25  754.94   15.15
  -1  -2 -25  735.39   15.15
   1  -2  25  723.57   14.86
  -1   2  25  718.61   14.44
  -1   2  25  769.66   15.55
   1  -2  25  762.61   14.77
  -1  -2 -25  716.90   14.80
   1   2 -24  630.51   13.37
   1   2 -24  650.34   13.24
  -1   2  24  648.41   13.54
   1   2 -24  643.22   13.31
  -1  -2 -24  642.93   13.24
  -1  -2 -24  602.51   12.86
  -1   2  24  607.92   12.51
   1   2 -24  662.28   13.70
   1  -2  24  623.63   12.85
   1   2 -24  637.46   13.18
   1  -2  24  649.68   12.78
  -1  -2 -24  626.78   13.18
  -1  -2 -23  158.57    4.72
   1   2 -23  159.59    4.79
  -1  -2 -23  149.28    4.46
  -1   2  23  158.03    4.94
   1   2 -23  154.63    4.72
   1   2 -23  162.34    4.75
   1  -2  23  164.51    4.46
   1   2 -23  151.00    4.60
   1   2 -23  157.82    4.85
  -1  -2 -23  162.67    4.78
   1  -2  23  164.25    4.55
  -1   2  23  151.82    4.23
   1  -2  22   76.37    2.78
   1   2 -22   77.35    2.98
   1   2 -22   74.89    3.02
  -1  -2 -22   75.65    2.83
   1  -2  22   80.32    2.78
   1   2 -22   73.75    2.92
  -1  -2 -22   77.47    3.01
  -1  -2 -22   77.68    3.02
  -1   2  22   75.78    2.63
  -1   2  22   78.78    3.11
   1   2 -22   76.29    3.08
   1  -2  21   68.77    2.48
  -1   2  21   67.69    2.38
   1  -2  21   65.82    2.57
   1  -2  21   67.17    2.51
   1   2 -21   68.49    2.77
   1   2 -21   71.65    2.76
  -1  -2 -21   66.29    2.71
  -1  -2 -21   64.94    2.71
   1   2 -21   68.71    2.84
   1   2 -21   67.84    2.76
  -1   2  21   73.20    2.89
  -1   2  20  169.39    4.24
   1   2 -20  174.19    4.75
   1  -2  20  169.85    4.45
  -1  -2 -20  171.15    4.76
   1   2 -20  162.24    4.72
   1  -2  20  168.37    4.54
   1  -2  19  191.88    4.75
   1   2 -19  197.87    5.08
  -1   2  19  193.93    4.57
  -1  -2 -19  189.49    5.07
   1   2 -19  183.45    5.10
   1   2 -18   95.43    3.41
   1   2 -18   94.94    3.07
   1  -2  18   89.17    2.81
   1  -2  18   89.63    3.01
  -1   2  18   88.58    3.06
  -1   2  18   94.82    2.69
  -1  -2 -18   93.36    3.13
   1   2 -18   92.66    3.16
   1  -2  17  533.04   11.17
  -1   2  17  570.20   11.36
   1   2 -17  589.69   11.86
   1  -2  17  541.85   10.83
  -1   2  17  580.07   10.73
   1   2 -17  580.46   11.36
  -1  -2 -17  570.14   11.46
   1   2 -17  568.86   11.49
  -1  -2 -16  130.52    3.80
   1  -2  16  133.35    3.42
  -1   2  16  127.22    3.67
   1  -2  16  126.74    3.62
   1   2 -16  139.39    4.14
   1   2 -16  137.43    3.77
  -1   2  16  139.65    3.30
   1   2 -16  129.34    3.81
   1   2 -15  214.31    5.28
   1   2 -15  215.18    5.53
   1   2 -15  219.44    5.23
   1  -2  15  215.78    5.11
   1  -2  15  218.91    4.85
  -1   2  15  221.22    4.64
   1   2 -14   81.03    2.60
  -1   2  14   77.47    2.48
   1   2 -14   81.18    2.56
  -1   2  14   80.53    2.13
   1   2 -14   78.63    2.66
   1  -2  14   81.25    2.31
   1   2 -14   76.95    2.78
   1  -2  14   76.08    2.46
   1   2 -13  240.26    5.76
   1   2 -13  245.69    5.48
   1  -2  13  233.76    5.33
  -1   2  13  250.41    5.39
   1   2 -13  235.90    5.38
  -1   2  13  243.49    4.84
   1  -2  13  241.43    5.06
   1   2 -13  239.33    5.54
  -1   2  12 1698.85   28.50
   1   2 -12 1643.43   29.14
  -1   2  12 1656.79   29.11
   1   2 -12 1660.88   29.24
   1   2 -12 1670.70   29.31
   1  -2  12 1701.67   28.77
   1  -2  12 1651.75   29.13
   1   2 -12 1672.02   29.60
  -1   2  11 3581.09   60.55
   1   2 -11 3543.71   60.66
   1   2 -11 3592.95   60.74
   1   2 -11 3641.68   61.04
   1  -2  11 3557.85   60.59
   1   2 -11 3604.12   60.61
  -1   2  11 3535.25   59.87
   1  -2  11 3607.62   60.16
   1   2 -10 1211.89   20.99
  -1   2  10 1207.08   20.95
   1  -2  10 1186.10   20.52
   1   2 -10 1203.17   21.07
   1   2 -10 1200.61   21.11
  -1   2  10 1197.52   20.24
   1   2  -9 2526.84   44.47
   1  -2   9 2605.25   44.01
  -1   2   9 2590.62   44.46
  -1   2   9 2633.35   43.71
   1  -2   9 2634.92   44.50
   1   2  -9 2657.20   44.56
   1   2  -9 2629.81   44.67
   1  -2   8  363.42    6.62
   1   2  -8  365.72    7.07
  -1   2   8  363.17    7.06
   1   2  -8  363.05    7.24
   1   2  -8  351.55    7.12
   1  -2   8  360.96    7.07
  -1   2   8  358.32    6.33
  -1   2   7  715.23   12.20
   1  -2   7  716.35   12.50
   1   2  -7  728.07   13.18
   1   2  -7  722.23   13.05
  -1   2   7  727.78   13.00
   1   2  -7  732.87   13.02
   1  -2   7  731.68   13.03
   1   2  -6  425.15    8.11
   1   2  -6  425.46    7.94
   1  -2   6  406.64    7.39
   1  -2   6  432.71    7.98
  -1  -2  -6  425.59    7.73
  -1   2   6  404.81    7.89
   1   2  -6  429.50    7.96
   1  -2   5 2323.30   38.61
   1   2  -5 2308.50   38.59
   1   2  -5 2277.90   38.79
  -1   2   5 2251.68   38.58
   1   2  -5 2300.07   38.63
  -1  -2  -5 2347.85   38.43
   1  -2   5 2246.17   37.98
  -1  -2  -4 3508.59   58.21
   1   2  -4 3481.68   58.36
   1  -2   4 3494.70   58.36
   1   2  -4 3376.42   58.52
   1   2  -4 3465.14   58.36
   1   2  -4 3447.73   58.58
  -1   2   4 3500.88   58.37
   1  -2   4 3465.42   57.70
   1   2  -3  266.86    5.32
  -1  -2  -3  264.73    5.00
   1  -2   3  263.01    5.11
   1   2  -3  259.94    5.15
   1   2  -3  263.43    5.30
   1   2  -3  262.90    5.13
  -1   2   3  256.57    5.12
  -1   2   2 1584.28   27.06
   1   2  -2 1543.99   27.24
   1   2  -2 1594.50   27.26
   1   2  -2 1561.52   27.06
  -1  -2  -2 1596.81   26.96
  -1   2   2 1580.55   27.10
   1  -2   2 1620.98   27.06
   1   2  -2 1561.05   27.10
   1   2  -1   18.67    0.83
  -1   2   1   19.42    0.86
   1   2  -1   19.81    0.86
   1   2  -1   20.39    0.96
  -1  -2  -1   19.71    0.82
   1   2  -1   20.75    0.98
   1  -2   1   21.17    0.87
  -1   2   1   20.12    0.87
   1   2   0   99.73    2.54
   1   2   0  100.68    2.41
  -1   2   0  100.36    2.40
  -1  -2   0   99.15    2.34
   1  -2   0  101.21    2.36
   1   2   0   95.95    2.35
  -1   2   0   96.80    2.37
  -1  -2   1   21.44    0.87
   1   2   1   21.72    0.90
   1   2   1   20.31    0.87
  -1   2  -1   18.94    0.85
   1  -2  -1   21.01    0.84
  -1   2  -1   19.12    0.84
   1  -2  -2 1617.36   26.98
  -1   2  -2 1611.88   27.13
   1   2   2 1559.74   27.08
  -1  -2   2 1598.69   27.05
  -1   2  -2 1568.55   27.07
   1   2   2 1534.47   27.10
   1   2   3  261.27    5.20
  -1   2  -3  262.73    5.19
  -1   2  -3  247.63    5.16
   1   2   3  251.45    5.19
  -1  -2   3  270.47    5.20
  -1   2  -3  265.23    4.58
   1  -2  -3  272.58    5.10
   1  -2  -4 3551.93   57.17
  -1   2  -4 3481.57   57.30
   1   2   4 3471.63   57.33
  -1  -2   4 3457.62   57.30
  -1   2  -4 3465.04   57.31
  -1  -2   5 2297.27   39.03
   1   2   5 2311.34   39.18
   1  -2  -5 2309.72   38.86
   1   2   5 2332.67   39.05
  -1   2  -5 2278.86   39.01
  -1   2  -5 2272.02   39.03
  -1   2  -6  409.64    7.22
   1   2   6  417.95    8.02
   1   2   6  423.16    7.90
   1  -2  -6  431.45    7.72
  -1  -2   6  420.69    7.91
  -1   2  -6  422.85    7.92
  -1   2  -6  414.86    7.89
  -1  -2   7  730.06   12.78
   1   2   7  726.84   12.85
  -1   2  -7  730.29   12.75
   1   2   7  739.34   12.77
  -1   2  -7  725.14   12.78
   1   2   8  352.53    6.91
  -1  -2   8  368.49    6.99
  -1   2  -8  347.48    6.97
   1   2   8  348.54    6.97
  -1   2  -8  353.84    6.94
  -1  -2   9 2672.12   44.31
  -1   2  -9 2558.36   44.22
   1   2   9 2632.09   44.23
   1   2   9 2575.15   44.28
  -1   2  -9 2565.82   44.28
  -1   2 -10 1176.17   20.96
  -1  -2  10 1207.88   20.99
   1   2  10 1200.11   20.85
   1   2  10 1188.11   20.90
  -1   2 -10 1153.87   20.87
  -1   2 -11 3593.67   61.01
   1   2  11 3610.35   60.94
   1   2  11 3606.33   61.00
  -1  -2  11 3638.40   61.02
  -1   2 -11 3563.52   61.05
  -1   2 -12 1667.69   28.91
  -1  -2  12 1680.53   28.82
   1   2  12 1694.68   28.83
  -1   2 -12 1638.22   28.83
   1   2  12 1596.25   28.70
  -1  -2  13  250.79    5.42
  -1   2 -13  242.19    5.46
   1   2  13  239.17    5.29
  -1   2 -13  237.31    5.37
   1   2  14   77.76    2.43
  -1   2 -14   78.90    2.53
  -1  -2  14   82.64    2.53
  -1   2 -14   80.24    2.57
  -1   2 -15  217.97    5.20
  -1  -2  15  218.70    5.11
   1   2  16  133.35    3.70
  -1  -2  16  129.80    3.65
   1  -2 -16  138.62    3.81
  -1   2 -16  133.60    3.75
   1  -2 -17  591.41   11.40
  -1   2 -17  571.75   11.31
  -1  -2  17  565.55   11.27
  -1  -2  18   92.85    3.08
   1   2  18   92.26    3.09
   1  -2 -18   98.12    3.18
  -1   2 -18   95.82    3.09
   1  -2 -19  194.49    5.08
  -1   2 -19  187.09    4.96
  -1   2 -20  172.28    4.73
   1  -2 -20  174.92    5.00
   1  -2 -20  174.22    4.81
  -1   2 -21   70.48    2.74
   1  -2 -21   71.41    2.79
   1  -2 -21   76.57    3.18
  -1   2 -21   69.48    2.78
   1  -2 -21   70.22    2.78
   1  -2 -21   69.86    2.90
  -1  -2  21   69.52    2.55
   1  -2 -21   70.87    2.98
   1   2  21   68.94    2.78
   1  -2 -22   77.49    3.31
   1  -2 -22   77.42    2.99
   1  -2 -22   90.42    3.43
  -1   2 -22   77.13    3.00
  -1   2 -22   74.80    2.91
   1  -2 -22   76.04    2.98
   1  -2 -22   79.43    3.14
   1   2  22   75.92    2.88
  -1  -2  22   77.46    2.77
   1   2  22   79.52    3.07
   1   2  23  163.39    4.86
   1  -2 -23  152.20    4.72
  -1   2 -23  161.71    4.80
  -1   2 -23  159.90    4.71
   1   2  23  163.84    4.69
   1  -2 -23  159.22    4.90
   1  -2 -23  157.60    4.74
   1  -2 -23  159.34    5.11
  -1  -2  23  161.31    4.49
  -1  -2  24  652.99   12.99
   1  -2 -24  655.55   13.44
   1   2  24  653.82   13.59
  -1   2 -24  658.01   13.34
   1  -2 -24  648.86   13.43
   1  -2 -24  651.36   13.67
  -1   2 -24  627.07   13.39
   1  -2 -24  653.05   13.94
   1   2  24  635.63   13.27
   1   2  25  771.70   15.60
   1  -2 -25  760.38   15.40
  -1   2 -25  745.83   15.26
  -1  -2  25  747.06   15.00
   1  -2 -25  782.15   15.67
   1  -2 -25  766.45   15.88
   1   2  25  746.45   15.21
  -1   2 -25  750.49   15.35
   1  -2 -25  762.30   15.39
   1  -2 -26   19.32    1.75
   1   2  26   16.93    1.42
   1   2  26   17.79    1.59
  -1   2 -26   16.84    1.45
   1  -2 -26   20.23    1.64
   1  -2 -26   16.82    1.47
  -1  -2  26   17.14    1.36
   1   2  26   17.20    1.39
  -1   2 -26   17.80    1.50
  -1   2 -27  866.63   17.51
  -1   2 -27  885.34   17.64
   1   2  27  874.18   17.46
   1  -2 -27  876.69   17.61
   1   2  27  879.69   17.27
   1  -2 -27  879.56   17.86
  -1  -2  27  885.36   17.18
   1  -2 -27  889.92   18.11
   1   2  27  918.76   17.97
   1   2  28  126.46    4.27
  -1  -2  28  134.61    4.18
   1  -2 -28  135.62    4.61
  -1   2 -28  134.81    4.54
   1  -2 -28  129.86    4.41
   1   2  28  130.22    4.59
  -1   2 -28  127.87    4.37
  -1   2 -28  131.50    4.43
   1   2  28  128.89    4.20
   1  -2 -28  126.14    4.66
   1   2  29  357.69    8.78
  -1   2 -29  344.85    8.49
  -1   2 -29  340.17    8.50
   1   2  29  341.80    8.27
   1  -2 -29  349.97    8.47
  -1   2 -29  330.04    8.36
   1  -2 -29  339.17    8.67
   1   2  29  350.52    8.20
  -1  -2  29  345.38    8.10
   1  -2 -29  354.19    8.86
  -1  -2  29  334.23    7.89
  -1  -2  30   32.77    1.87
  -1  -2  30   33.08    1.94
  -1   2 -30   34.03    2.11
   1   2  30   36.08    2.29
   1   2  30   31.72    1.95
   1  -2 -30   36.00    2.14
   1  -2 -30   32.89    2.19
  -1   2 -30   31.55    2.03
  -1   2 -30   35.77    2.19
   1  -2 -30   33.70    2.30
   1   2  31   10.66    1.14
  -1  -2  31   10.95    1.12
   1  -2 -31   10.26    1.23
  -1  -2  31   10.20    1.17
  -1   2 -31   10.69    1.20
   1   2  31   12.54    1.43
   1  -2 -31   11.17    1.33
  -1   2 -31   10.63    1.30
   1  -2 -31   11.02    1.38
  -1   2 -31   11.82    1.31
   1   2  32   27.48    1.74
  -1  -2  32   26.31    1.74
  -1   2 -32   28.16    1.89
   1  -2 -32   29.88    1.96
  -1  -2  32   27.83    1.70
   1  -2 -32   27.98    2.01
  -1   2 -32   27.06    1.91
   1   2  32   27.50    2.01
  -1   2 -32   28.42    1.96
   1  -2 -32   28.50    2.07
  -1  -2  33  119.12    3.92
   1  -2 -33  123.34    4.35
  -1  -2  33  116.16    3.70
  -1   2 -33  123.62    4.22
   1   2  33  115.35    3.80
   1  -2 -33  126.49    4.27
   1  -2 -33  127.63    4.43
  -1   2 -33  126.65    4.25
  -1   2 -33  124.49    4.32
   1   2  33  123.34    4.36
  -1  -2  34  100.13    3.48
   1   2  34   92.42    3.25
   1  -2 -34  106.12    4.00
  -1   2 -34  108.30    3.86
   1  -2 -34  105.28    3.78
   1   2  34   96.85    3.76
  -1   2 -34  104.77    3.75
   1  -2 -34   99.14    3.77
  -1  -2  35    7.11    0.96
  -1   2 -35    8.53    1.07
  -1   2 -35    8.01    1.05
   1  -2 -35    8.59    1.05
   1  -2 -35    7.12    1.13
   1   2  35    7.72    1.11
   1  -2 -35    7.31    1.07
  -1   2 -36   64.64    2.73
   1  -2 -36   61.07    2.81
   1  -2 -36   60.41    2.68
   1   2  36   60.27    2.71
  -1   2 -36   62.78    2.74
  -1  -2  36   56.67    2.45
   1  -2 -36   63.27    2.77
  -1   2 -37   44.28    2.18
   1  -2 -37   48.22    2.37
   1  -2 -37   43.56    2.15
  -1  -2  37   41.94    2.00
   1   2  37   40.46    2.11
  -1   2 -37   43.33    2.14
   1   2  38   27.96    1.67
  -1   2 -38   31.04    1.75
  -1  -2  38   28.09    1.57
   1  -2 -38   31.05    1.74
   1  -2 -38   32.01    1.85
  -1   2 -38   32.65    1.78
  -1   2 -39   17.59    1.25
   1  -2 -39   16.25    1.21
   1   2  39   15.75    1.19
   1  -2 -39   16.80    1.32
  -1  -2  39   14.55    1.10
  -1   2 -39   16.28    1.22
   1  -2 -40   43.33    1.97
  -1   2 -40   41.27    1.80
   1   2  40   37.73    1.74
  -1   2 -40   41.23    1.80
   1  -2 -40   42.78    1.83
  -1  -2  40   36.10    1.64
   1  -2 -41   47.53    1.80
  -1   2 -41   45.46    1.77
  -1   2 -41   45.18    1.77
   1  -2 -41   47.29    1.93
  -1  -2  41   41.65    1.66
  -1   2 -42    5.99    0.60
  -1   2 -42    6.81    0.63
   1  -2 -42    6.51    0.60
   1  -2 -42    7.03    0.70
  -1  -2  42    5.55    0.56
   1  -2 -43    0.22    0.28
  -1   2 -43    0.30    0.20
  -1  -2  43    0.29    0.22
   1  -2 -43    0.21    0.20
  -1   2 -43    0.34    0.23
   1  -2 -44    3.27    0.36
   1   3 -42    9.60    0.53
   1  -3  42   10.56    0.54
   1  -3  42   11.25    0.62
  -1  -3 -42    9.13    0.53
   1  -3  41    6.41    0.55
   1   3 -41    7.26    0.57
   1   3 -41    7.34    0.58
  -1  -3 -41    6.75    0.55
   1   3 -40   16.36    0.96
   1   3 -40   15.65    0.95
  -1  -3 -40   14.10    0.90
   1  -3  40   14.39    0.88
   1  -3  39   19.46    1.17
   1   3 -39   21.27    1.21
   1  -3  39   19.37    1.09
   1   3 -39   20.95    1.20
  -1  -3 -39   18.71    1.15
   1   3 -38   39.71    1.81
   1   3 -38   40.40    1.81
   1  -3  38   37.09    1.63
  -1  -3 -38   39.17    1.79
   1  -3  38   40.35    1.78
   1  -3  37    4.90    0.77
  -1  -3 -37    4.09    0.71
   1   3 -37    5.55    0.78
   1  -3  37    4.16    0.67
  -1  -3 -37    5.24    0.64
   1   3 -37    4.58    0.76
   1   3 -36   25.88    1.61
   1   3 -36   23.86    1.56
   1  -3  36   24.15    1.45
  -1  -3 -36   26.03    1.59
  -1  -3 -36   24.57    1.40
   1  -3  36   23.85    1.50
   1  -3  35   13.57    1.15
   1  -3  35   12.77    1.19
  -1  -3 -35   13.94    1.24
   1   3 -35   15.21    1.31
  -1  -3 -35   14.72    1.14
   1   3 -35   14.22    1.26
   1  -3  34   23.76    1.53
   1   3 -34   23.45    1.66
  -1   3  34   21.37    1.73
  -1  -3 -34   23.51    1.65
  -1  -3 -34   22.59    1.48
   1  -3  34   22.61    1.59
   1   3 -34   23.81    1.67
   1  -3  33  160.30    4.61
   1   3 -33  166.30    4.98
  -1   3  33  161.11    5.24
   1   3 -33  169.66    5.04
  -1  -3 -33  159.72    4.90
  -1  -3 -33  155.51    4.59
   1  -3  33  167.04    4.87
  -1   3  32    9.19    1.31
   1   3 -32    9.78    1.22
   1  -3  32    9.65    1.17
   1   3 -32    8.89    1.15
  -1  -3 -32    8.77    1.12
  -1  -3 -32    9.28    1.05
   1  -3  32    8.21    1.02
   1   3 -31   27.37    1.86
   1  -3  31   22.04    1.67
   1  -3  31   24.29    1.63
  -1   3  31   21.87    1.88
   1   3 -31   20.69    1.68
  -1  -3 -31   18.43    1.59
   1   3 -31   27.90    1.86
  -1  -3 -31   20.93    1.55
   1  -3  30  232.29    5.89
  -1   3  30  225.05    6.62
   1   3 -30  223.00    6.26
  -1  -3 -30  218.09    5.91
  -1  -3 -30  213.41    6.11
   1   3 -30  223.90    6.21
   1   3 -30  219.36    6.19
   1  -3  30  230.77    6.09
   1   3 -29   78.66    3.39
  -1   3  29   77.25    3.59
   1   3 -29   77.93    3.34
   1   3 -29   83.44    3.44
  -1  -3 -29   74.96    3.24
  -1  -3 -29   76.56    3.10
   1   3 -29   72.39    3.30
   1  -3  29   81.68    3.28
   1  -3  29   84.12    3.16
   1  -3  28  548.59   11.41
   1  -3  28  547.27   11.17
   1   3 -28  514.02   11.54
   1   3 -28  542.23   11.72
   1   3 -28  527.04   11.58
  -1   3  28  511.76   12.03
   1  -3  28  495.19   10.95
  -1  -3 -28  504.86   11.51
  -1  -3 -28  490.24   11.11
   1   3 -28  487.99   11.67
   1   3 -27   13.58    1.40
   1   3 -27   12.02    1.35
   1   3 -27   11.52    1.35
   1  -3  27   13.59    1.28
  -1   3  27   12.28    1.53
   1   3 -27   14.62    1.42
   1  -3  27   13.07    1.21
  -1  -3 -27   13.16    1.37
  -1  -3 -27   11.74    1.22
   1  -3  27   14.46    1.41
   1  -3  26  358.19    8.20
  -1  -3 -26  336.59    8.56
   1   3 -26  360.77    8.77
   1  -3  26  334.25    8.03
   1   3 -26  349.72    8.61
  -1   3  26  367.10    9.14
   1   3 -26  364.29    8.70
   1   3 -26  350.42    8.89
  -1  -3 -26  349.30    8.34
   1  -3  26  344.49    8.34
   1  -3  25  395.42    8.65
  -1  -3 -25  363.52    9.00
   1  -3  25  373.10    8.43
   1   3 -25  382.85    9.08
  -1  -3 -25  357.21    8.68
   1   3 -25  370.08    9.31
   1   3 -25  385.89    9.19
  -1   3  25  384.80    9.44
   1   3 -24  493.01   10.92
  -1  -3 -24  453.61   10.44
  -1   3  24  496.74   11.21
  -1  -3 -24  462.94   10.76
   1  -3  24  504.30   10.33
   1   3 -24  485.16   10.79
   1  -3  24  467.16   10.10
   1  -3  23   36.30    1.91
   1  -3  23   37.16    1.85
  -1  -3 -23   35.05    2.12
   1   3 -23   37.01    2.22
  -1   3  23   35.63    2.25
  -1  -3 -23   34.35    1.98
   1   3 -23   36.29    2.16
  -1  -3 -22  118.79    4.12
   1   3 -22  125.37    4.15
   1   3 -22  122.07    4.22
   1   3 -22  113.90    3.86
  -1   3  22  127.69    4.39
   1  -3  22  117.74    3.62
  -1  -3 -22  115.51    3.90
   1  -3  22  119.30    3.76
  -1   3  21   68.85    3.04
   1   3 -21   69.92    2.92
   1  -3  21   65.52    2.48
  -1  -3 -21   65.80    2.91
  -1  -3 -21   63.81    2.72
   1   3 -21   63.37    2.71
   1   3 -21   67.80    2.96
   1  -3  21   69.34    2.62
   1  -3  20   91.53    2.93
  -1   3  20   95.09    3.51
  -1  -3 -20   86.59    3.37
   1   3 -20   85.16    3.22
   1   3 -20   88.17    3.57
   1  -3  20   86.76    3.00
   1   3 -20   89.13    3.37
   1   3 -20   90.83    3.43
   1   3 -19  245.86    6.34
   1  -3  19  251.82    5.96
   1   3 -19  259.45    6.50
   1   3 -19  250.45    6.52
  -1   3  19  259.08    6.54
   1   3 -19  249.60    6.79
   1  -3  19  248.46    5.77
  -1  -3 -19  244.04    6.48
   1   3 -19  243.89    6.09
   1  -3  18  225.80    5.24
   1   3 -18  227.54    5.93
   1  -3  18  224.38    5.43
   1   3 -18  218.58    5.56
   1   3 -18  219.64    5.93
  -1  -3 -18  217.70    5.91
  -1   3  18  226.85    5.92
   1   3 -18  232.03    6.28
   1   3 -18  215.39    5.77
   1  -3  17    5.90    0.65
   1   3 -17    6.83    0.91
   1   3 -17    4.77    0.82
   1   3 -17    8.31    0.88
  -1   3  17    5.05    0.80
  -1  -3 -17    5.02    0.78
   1  -3  17    5.02    0.69
   1   3 -17    5.29    0.96
   1   3 -16  444.51    9.62
   1   3 -16  441.82    9.33
   1   3 -16  451.21    9.71
   1  -3  16  453.56    8.90
   1   3 -16  461.58   10.09
   1   3 -15  168.95    4.62
   1  -3  15  166.57    3.95
   1   3 -15  163.94    4.55
   1   3 -15  161.92    4.79
   1   3 -14  257.13    6.08
   1  -3  14  254.46    5.31
   1  -3  14  243.50    5.94
   1   3 -14  259.43    6.33
   1   3 -13  288.51    6.68
   1  -3  13  289.55    5.86
   1   3 -13  283.35    6.56
   1   3 -13  300.50    6.93
   1  -3  13  277.78    6.52
   1  -3  12   49.31    1.57
   1   3 -12   48.47    2.00
   1  -3  12   52.18    2.05
   1   3 -12   52.01    2.25
   1   3 -12   45.32    2.02
   1   3 -11    6.47    0.76
   1   3 -11    6.01    0.75
   1  -3  11    6.09    0.68
   1   3 -10  373.67    7.63
   1   3 -10  363.01    7.62
   1  -3  10  343.20    7.46
   1  -3  10  349.10    6.69
   1   3  -9  285.84    6.28
   1   3  -9  291.09    6.37
   1  -3   9  282.77    6.24
   1   3  -8 2552.38   43.44
  -1  -3  -8 2605.86   43.09
   1   3  -8 2485.49   43.39
   1   3  -8 2501.39   43.47
   1  -3   8 2494.83   43.37
  -1   3   8 2475.94   43.41
   1   3  -7  697.94   13.00
  -1   3   7  670.82   13.00
  -1  -3  -7  700.62   12.72
   1  -3   7  688.45   12.98
   1   3  -7  707.91   13.04
  -1   3   7  682.13   13.01
   1   3  -7  698.24   13.06
   1  -3   6 1286.23   23.02
  -1  -3  -6 1277.93   22.76
  -1   3   6 1291.01   23.09
   1   3  -6 1313.96   23.09
   1   3  -6 1315.09   23.06
  -1   3   6 1306.72   23.11
   1   3  -6 1321.01   23.09
   1   3  -5  509.98    9.94
  -1  -3  -5  509.57    9.68
   1   3  -5  521.48    9.93
  -1   3   5  509.51    9.95
   1   3  -5  513.19    9.93
   1  -3   5  503.51    9.87
  -1   3   5  519.01    9.97
   1   3  -4   46.41    1.73
   1   3  -4   43.36    1.68
  -1  -3  -4   43.56    1.55
   1  -3   4   43.55    1.66
   1   3  -4   40.88    1.62
  -1   3   4   43.01    1.70
   1   3  -4   43.50    1.72
  -1   3   4   42.71    1.68
   1   3  -3 2427.55   40.43
  -1   3   3 2388.60   40.47
   1   3  -3 2349.50   40.39
   1   3  -3 2390.47   40.42
   1  -3   3 2350.76   40.37
  -1   3   3 2317.51   40.43
   1   3  -3 2323.83   40.46
  -1  -3  -3 2290.52   40.18
   1   3  -2  510.87    9.90
   1   3  -2  534.42    9.95
   1   3  -2  527.84    9.97
   1  -3   2  522.27    9.88
  -1  -3  -2  511.70    9.74
   1   3  -2  509.11    9.95
  -1   3   2  509.72    9.92
  -1   3   2  501.60    9.91
   1   3  -1  480.53    9.13
  -1   3   1  479.83    9.16
   1   3  -1  461.19    9.04
  -1  -3  -1  462.21    8.92
   1  -3   1  461.62    9.00
   1   3  -1  458.54    9.04
  -1   3   1  466.10    9.10
   1   3  -1  470.16    9.15
   1   3   0  204.56    4.51
  -1   3   0  191.01    4.43
   1   3   0  190.82    4.41
  -1  -3   0  185.15    4.30
   1  -3   0  195.21    4.37
   1   3   0  193.86    4.44
   1   3   0  199.35    4.53
  -1   3   0  194.58    4.47
  -1   3  -1  460.34    9.01
   1  -3  -1  465.83    8.90
  -1  -3   1  471.15    8.95
   1   3   1  476.35    9.09
   1   3   1  455.61    9.00
  -1   3  -1  455.80    9.02
   1   3   1  464.15    9.10
  -1   3  -1  457.75    8.32
   1   3   1  476.80    9.05
   1   3   2  522.55    9.89
  -1   3  -2  520.23    9.90
   1  -3  -2  517.87    9.71
  -1  -3   2  508.93    9.77
   1   3   2  509.01    9.83
  -1   3  -2  509.73    9.06
   1   3   2  502.77    9.92
  -1   3  -2  500.35    9.83
   1   3   2  520.63    9.87
  -1   3  -3 2355.72   40.52
   1   3   3 2368.18   40.59
  -1   3  -3 2356.02   40.54
   1   3   3 2384.48   40.64
  -1  -3   3 2362.57   40.47
   1   3   3 2354.18   40.54
   1  -3  -3 2352.20   40.34
  -1   3  -4   43.32    1.68
   1   3   4   43.97    1.69
  -1   3  -4   42.27    1.65
   1  -3  -4   45.13    1.58
  -1  -3   4   44.00    1.64
   1   3   4   43.36    1.74
   1   3   4   43.92    1.69
   1  -3  -5  531.22    9.71
  -1   3  -5  520.58    9.92
   1   3   5  512.09    9.92
  -1   3  -5  513.70    9.89
  -1  -3   5  522.75    9.88
   1   3   5  509.03    9.94
  -1   3  -6 1298.94   23.16
   1   3   6 1280.44   23.18
  -1   3  -6 1310.95   23.20
   1   3   6 1295.61   23.21
  -1  -3   6 1310.10   23.15
   1  -3  -6 1350.76   22.95
  -1   3  -7  694.96   12.97
   1  -3  -7  692.52   12.67
   1   3   7  695.85   12.98
   1   3   7  670.43   12.94
  -1  -3   7  681.38   12.94
  -1   3  -7  710.54   13.03
   1  -3  -8 2519.85   43.18
  -1   3  -8 2545.89   43.57
  -1  -3   8 2502.01   43.48
   1   3   8 2526.87   43.52
  -1   3  -8 2559.51   43.56
  -1  -3   9  298.07    6.39
  -1   3  -9  287.81    6.42
  -1  -3  10  357.89    7.46
  -1   3 -10  366.31    7.56
  -1  -3  11    6.80    0.71
  -1   3 -11    6.46    0.75
   1   3  11    5.37    0.74
  -1   3 -12   47.72    2.04
   1   3  12   48.56    2.03
  -1  -3  12   50.30    2.04
   1   3  13  284.52    6.48
  -1  -3  13  281.79    6.49
  -1   3 -13  282.61    6.58
  -1   3 -14  244.71    5.98
   1   3  14  251.42    5.94
  -1  -3  14  246.02    5.93
  -1   3 -15  164.60    4.54
   1   3  15  161.78    4.46
  -1   3 -16  455.12    9.70
   1  -3 -16  441.83    9.89
   1   3  16  455.13    9.60
  -1  -3  17    6.50    0.76
  -1   3 -17    5.62    0.85
   1  -3 -17    5.48    0.93
   1  -3 -17    5.55    0.80
   1   3  17    4.94    0.78
   1  -3 -17    5.25    0.84
  -1   3 -17    5.81    0.84
   1   3  17    5.79    0.84
   1   3  18  229.30    5.78
   1  -3 -18  216.10    6.07
  -1   3 -18  233.15    5.87
  -1   3 -18  219.70    5.84
   1  -3 -18  214.70    5.82
   1   3  18  211.01    5.67
  -1  -3  18  219.27    5.35
   1  -3 -18  221.70    6.04
   1  -3 -19  244.22    6.63
  -1   3 -19  240.05    6.25
  -1   3 -19  240.45    6.34
   1  -3 -19  242.88    6.33
   1  -3 -19  246.04    6.55
  -1  -3  19  248.83    5.87
   1   3  19  253.00    6.29
   1   3  19  236.90    6.21
   1  -3 -20   89.48    3.59
  -1   3 -20   89.60    3.36
   1   3  20   83.20    3.25
   1  -3 -20   87.78    3.33
   1  -3 -20   91.54    3.53
  -1   3 -20   88.66    3.31
   1   3  20   84.22    3.22
  -1  -3  20   84.78    2.95
  -1  -3  21   67.18    2.59
  -1   3 -21   71.71    2.93
  -1   3 -21   69.66    2.96
   1  -3 -21   64.08    2.86
   1  -3 -21   69.36    3.09
   1   3  21   68.67    2.93
   1   3  21   65.00    2.79
   1  -3 -21   63.46    3.05
  -1   3 -22  123.14    4.13
   1  -3 -22  125.61    4.50
   1  -3 -22  124.22    4.38
  -1   3 -22  122.04    4.18
   1  -3 -22  122.16    4.18
   1   3  22  123.89    4.11
   1   3  22  123.33    4.22
  -1  -3  22  119.26    3.78
  -1  -3  23   35.16    1.88
  -1   3 -23   36.77    2.12
   1  -3 -23   37.20    2.17
   1  -3 -23   34.51    2.18
  -1   3 -23   36.15    2.15
   1   3  23   38.00    2.23
   1   3  23   33.86    2.05
   1  -3 -23   36.70    2.35
  -1  -3  24  475.90   10.12
  -1   3 -24  465.83   10.70
   1  -3 -24  465.80   10.66
  -1   3 -24  476.07   10.67
   1   3  24  477.43   10.85
   1  -3 -24  475.62   10.94
   1   3  24  463.01   10.55
  -1   3 -25  371.00    8.96
  -1  -3  25  381.88    8.49
   1   3  25  355.76    8.78
  -1   3 -25  371.14    8.88
   1   3  25  376.53    9.17
   1  -3 -25  371.54    8.94
   1  -3 -25  366.74    9.14
  -1  -3  26  360.32    8.17
  -1   3 -26  350.56    8.67
  -1   3 -26  348.34    8.57
   1   3  26  364.00    8.95
   1  -3 -26  348.01    8.81
   1  -3 -26  349.35    8.59
   1   3  26  332.30    8.47
   1  -3 -27   13.33    1.39
   1   3  27   15.78    1.63
  -1   3 -27   13.37    1.40
   1  -3 -27   12.16    1.41
   1   3  27   13.85    1.37
  -1   3 -27   12.51    1.32
  -1  -3  27   13.51    1.29
   1   3  28  522.29   11.77
   1  -3 -28  518.85   11.43
  -1   3 -28  517.58   11.39
   1   3  28  510.43   11.28
  -1  -3  28  520.61   10.95
   1  -3 -28  480.58   11.66
  -1   3 -28  523.93   11.46
  -1   3 -29   74.38    3.28
   1  -3 -29   79.97    3.55
  -1   3 -29   77.25    3.29
   1   3  29   83.63    3.62
   1  -3 -29   81.33    3.36
   1   3  29   82.02    3.34
  -1  -3  29   79.34    3.09
   1   3  30  219.18    6.19
   1  -3 -30  218.32    6.28
   1   3  30  235.18    6.69
  -1   3 -30  230.67    6.48
  -1   3 -30  227.72    6.32
  -1  -3  30  227.15    5.96
  -1   3 -30  228.47    6.36
   1  -3 -30  231.26    6.66
  -1  -3  31   27.93    1.71
   1  -3 -31   19.00    1.75
   1   3  31   21.22    1.82
  -1   3 -31   25.35    1.79
  -1   3 -31   20.46    1.69
   1  -3 -31   19.97    1.60
  -1   3 -31   21.91    1.66
   1   3  31   21.09    1.60
  -1   3 -32    7.31    1.10
   1  -3 -32    9.24    1.12
  -1   3 -32    8.84    1.15
   1  -3 -32    8.04    1.21
   1   3  32    9.53    1.29
  -1  -3  32    7.81    1.02
  -1   3 -33  163.38    4.92
   1  -3 -33  167.80    4.95
   1   3  33  163.29    5.14
  -1  -3  33  155.68    4.55
  -1   3 -33  159.28    4.99
   1  -3 -33  166.49    5.12
   1   3  34   25.29    1.82
   1  -3 -34   24.40    1.66
  -1   3 -34   23.74    1.67
  -1  -3  34   22.56    1.50
  -1   3 -34   23.96    1.70
  -1   3 -35   14.22    1.30
  -1   3 -35   14.23    1.27
   1  -3 -35   14.42    1.26
  -1  -3  35   12.58    1.12
  -1  -3  36   23.39    1.42
  -1   3 -36   25.01    1.57
   1  -3 -36   25.77    1.59
  -1   3 -36   26.69    1.66
  -1  -3  37    4.85    0.72
  -1   3 -37    4.89    0.80
  -1   3 -37    4.60    0.75
   1  -3 -37    5.77    0.78
  -1  -3  38   37.61    1.67
  -1   3 -38   39.71    1.85
   1  -3 -38   40.08    1.80
  -1   3 -38   38.52    1.79
  -1  -3  39   19.12    1.11
  -1   3 -39   19.72    1.17
  -1   3 -39   21.56    1.24
   1  -3 -39   20.78    1.20
  -1   3 -40   15.89    0.95
  -1   3 -40   17.63    1.03
   1  -3 -40   16.10    0.96
  -1  -3  40   14.37    0.88
  -1  -3  41    6.26    0.54
  -1   3 -41    6.36    0.56
  -1   3 -41    6.92    0.59
   1  -3 -41    7.73    0.59
  -1   3 -42    9.17    0.55
  -1  -3  42    9.27    0.50
   1  -4  39   27.12    1.02
   1   4 -39   27.94    1.07
  -1  -4 -39   27.24    1.06
   1  -4  38   15.33    0.87
  -1  -4 -38   15.66    0.92
   1   4 -38   16.33    0.93
   1   4 -38   16.32    0.88
   1  -4  38   16.07    0.93
   1  -4  37   51.99    1.89
   1   4 -37   54.98    1.96
   1   4 -37   56.56    1.94
  -1  -4 -37   53.66    1.93
   1  -4  37   51.91    1.80
   1  -4  36   46.18    1.77
   1  -4  36   46.90    1.85
   1   4 -36   50.34    1.97
   1   4 -36   49.07    1.93
  -1  -4 -36   46.64    1.92
   1  -4  35    9.72    0.87
   1   4 -35   10.52    0.95
  -1  -4 -35   11.57    1.00
   1  -4  35   11.12    0.99
   1   4 -35   10.21    0.96
   1  -4  34   53.84    2.22
   1  -4  34   55.07    2.13
   1   4 -34   55.18    2.32
   1   4 -34   55.89    2.29
  -1  -4 -34   55.37    2.33
   1   4 -33   35.32    1.93
   1  -4  33   36.58    1.76
  -1  -4 -33   31.62    1.59
   1   4 -33   35.51    1.88
  -1  -4 -33   35.78    1.91
   1  -4  33   36.94    1.86
  -1  -4 -32  122.10    3.69
   1  -4  32  124.70    3.90
   1  -4  32  126.95    3.77
   1   4 -32  130.36    4.05
  -1  -4 -32  123.13    3.98
   1   4 -32  130.76    4.10
   1  -4  31   84.74    2.96
   1   4 -31   80.68    3.20
   1  -4  31   81.74    3.05
   1   4 -31   77.05    3.07
  -1  -4 -31   77.95    3.12
  -1  -4 -31   77.51    2.85
   1  -4  30    6.83    1.02
   1  -4  30    5.44    0.84
  -1  -4 -30    5.98    0.82
   1   4 -30    6.05    0.98
  -1  -4 -30    6.77    1.02
   1   4 -30    7.55    1.04
   1  -4  29  216.07    5.52
   1   4 -29  205.35    5.77
  -1  -4 -29  197.08    5.75
  -1  -4 -29  195.88    5.43
   1  -4  29  208.06    5.65
   1   4 -29  202.25    5.84
   1  -4  28   81.75    3.18
   1   4 -28   77.17    3.26
   1  -4  28   83.88    3.06
   1   4 -28   77.73    3.30
  -1  -4 -28   71.27    3.16
  -1  -4 -28   72.91    2.97
   1   4 -28   77.34    3.31
   1  -4  27   25.32    1.76
   1   4 -27   27.49    1.98
   1   4 -27   24.81    1.81
   1   4 -27   24.79    1.80
  -1  -4 -27   22.82    1.75
  -1  -4 -27   25.88    1.70
   1  -4  27   27.48    1.71
   1   4 -26   42.82    2.39
   1  -4  26   45.39    2.36
   1   4 -26   41.77    2.47
   1  -4  26   45.11    2.25
  -1  -4 -26   40.27    2.39
  -1  -4 -26   43.72    2.26
   1   4 -25  129.33    4.52
   1  -4  25  128.06    4.04
   1  -4  25  130.69    4.23
   1   4 -25  126.26    4.41
  -1  -4 -25  116.05    4.32
  -1  -4 -25  120.19    4.13
  -1  -4 -24  289.73    7.34
   1  -4  24  299.57    7.11
   1   4 -24  282.89    7.56
   1   4 -24  297.81    7.76
  -1  -4 -24  275.38    7.52
   1  -4  24  289.94    7.28
   1   4 -23   93.65    3.84
   1   4 -23   99.72    3.83
  -1  -4 -23   87.46    3.71
  -1  -4 -23   94.56    3.57
   1  -4  23   98.61    3.44
   1  -4  23   98.21    3.55
   1   4 -22  143.22    4.79
   1   4 -22  144.49    4.86
  -1  -4 -22  137.41    4.78
  -1  -4 -22  143.35    4.62
   1  -4  22  150.70    4.40
   1  -4  22  145.47    4.52
   1   4 -21  575.45   12.79
   1  -4  21  579.09   11.74
   1   4 -21  564.29   12.39
   1   4 -21  569.76   12.49
  -1  -4 -21  547.05   12.39
  -1  -4 -21  556.30   12.12
   1  -4  21  555.31   11.85
   1   4 -20   80.22    3.41
  -1  -4 -20   78.27    3.40
  -1  -4 -20   82.77    3.29
   1   4 -20   82.70    3.61
   1  -4  20   76.41    3.04
   1  -4  20   82.43    3.02
   1   4 -20   86.54    3.52
   1   4 -19  169.15    5.45
   1   4 -19  163.19    5.14
  -1  -4 -19  163.17    5.20
   1   4 -19  160.82    5.16
   1  -4  19  169.23    4.66
   1   4 -18   34.71    2.12
   1   4 -18   35.74    2.19
  -1  -4 -18   35.84    2.19
   1   4 -18   34.56    2.28
   1  -4  18   37.92    1.91
   1   4 -18   31.96    1.91
   1   4 -17  249.23    6.59
   1   4 -17  233.39    6.57
   1   4 -17  237.08    6.21
   1  -4  17  247.01    6.03
   1   4 -17  243.37    6.18
  -1  -4 -17  236.17    6.55
   1   4 -17  258.24    6.93
   1   4 -16  232.54    6.25
   1   4 -16  221.32    5.83
  -1  -4 -16  227.03    6.30
   1   4 -16  233.83    6.02
   1  -4  16  228.27    5.73
   1   4 -16  229.16    6.29
   1   4 -16  237.54    6.52
   1   4 -15  180.14    5.22
   1  -4  15  179.63    4.75
   1   4 -15  181.98    5.33
   1   4 -15  175.21    4.89
  -1  -4 -15  174.28    5.24
   1   4 -15  186.99    5.09
   1   4 -15  180.11    5.43
   1   4 -14  205.66    5.71
   1   4 -14  206.36    5.42
   1  -4  14  211.69    5.29
  -1  -4 -14  204.54    5.71
  -1   4  14  203.38    5.63
   1   4 -14  216.21    5.90
   1  -4  14  204.75    5.18
   1   4 -14  200.72    5.67
   1   4 -14  196.81    5.29
   1   4 -13  242.05    6.34
   1   4 -13  229.86    6.13
   1  -4  13  241.15    5.75
   1   4 -13  229.60    5.75
   1   4 -13  231.82    5.84
  -1  -4 -13  227.68    6.13
  -1   4  13  225.64    6.01
   1   4 -13  240.09    6.19
   1  -4  13  225.40    5.61
   1   4 -12  327.31    7.36
   1  -4  12  314.57    7.10
   1   4 -12  310.68    7.59
  -1  -4 -12  306.50    7.58
   1  -4  12  323.03    7.19
  -1   4  12  323.39    7.57
   1   4 -12  313.12    7.18
   1   4 -12  326.85    7.63
   1   4 -11  168.75    4.80
   1   4 -11  167.45    4.48
  -1  -4 -11  160.37    4.76
  -1   4  11  170.51    4.80
   1   4 -11  169.35    4.61
   1  -4  11  160.15    4.38
   1  -4  11  181.09    4.56
   1   4 -11  165.07    4.82
   1  -4  10  454.67    9.17
   1   4 -10  458.17    9.58
   1   4 -10  411.89    9.01
   1   4 -10  461.56    9.40
   1  -4  10  427.50    9.00
  -1  -4 -10  416.49    9.45
  -1   4  10  427.58    9.41
   1   4  -9   78.78    2.70
   1  -4   9   81.87    2.76
   1   4  -9   84.55    3.01
   1  -4   9   72.75    2.67
  -1   4   9   82.18    2.96
   1   4  -9   81.33    2.83
   1  -4   8   30.60    1.59
   1  -4   8   27.03    1.52
  -1   4   8   29.56    1.69
   1   4  -8   30.06    1.68
   1   4  -8   33.48    1.69
   1   4  -7  211.53    5.40
   1   4  -7  214.37    5.28
  -1   4   7  216.03    5.46
   1   4  -6  137.89    3.86
  -1   4   6  138.12    3.98
   1   4  -6  135.49    3.93
   1  -4   5  434.47    9.31
  -1   4   5  457.64    9.50
   1   4  -5  448.31    9.42
   1   4  -5  457.04    9.31
   1  -4   4  282.67    6.40
  -1  -4  -4  275.75    6.18
  -1   4   4  280.61    6.49
  -1   4   4  271.74    5.86
   1   4  -4  284.27    6.40
   1   4  -4  276.49    6.45
  -1  -4  -3  121.71    3.41
   1   4  -3  127.46    3.61
   1  -4   3  124.82    3.56
  -1   4   3  119.18    3.62
  -1   4   3  118.57    3.09
   1   4  -3  123.81    3.62
  -1   4   2  187.70    4.78
   1   4  -2  181.55    4.70
  -1  -4  -2  177.78    4.48
   1  -4   2  181.35    4.59
  -1   4   2  180.59    4.10
   1   4  -2  179.23    4.65
   1   4  -1  175.98    4.28
   1  -4   1  163.15    4.24
  -1   4   1  160.16    3.74
  -1  -4  -1  157.27    4.15
  -1   4   1  166.23    4.42
   1   4  -1  163.55    4.32
   1   4  -1  162.67    4.36
   1  -4   0    0.87    0.33
  -1  -4   0    0.83    0.32
   1   4   0    1.27    0.52
   1   4   0    1.13    0.47
   1   4   0    1.94    0.48
  -1   4   0    1.11    0.46
   1  -4  -1  162.54    4.21
  -1  -4   1  158.99    4.18
   1   4   1  161.42    4.34
   1   4   1  165.95    4.36
  -1   4  -1  159.87    4.36
   1   4   1  169.52    4.19
   1   4   2  196.18    4.61
   1   4   2  179.96    4.72
  -1  -4   2  175.25    4.56
  -1   4  -2  184.98    4.76
   1   4   2  181.86    4.73
   1  -4  -2  187.47    4.60
   1   4   3  121.49    3.42
   1  -4  -3  117.69    3.38
   1   4   3  125.47    3.63
  -1  -4   3  120.27    3.50
   1   4   3  125.95    3.64
  -1   4  -3  122.20    3.61
   1   4   4  281.58    6.27
   1  -4  -4  285.00    6.29
  -1  -4   4  279.38    6.43
   1   4   4  279.62    6.52
   1   4   4  294.92    6.62
  -1   4  -4  278.78    6.52
   1   4   5  450.15    9.23
   1   4   5  456.36    9.55
   1   4   5  474.13    9.64
  -1   4  -5  457.54    9.52
   1  -4  -5  447.13    9.20
   1   4   6  136.01    3.71
  -1   4  -6  133.37    3.92
   1   4   6  137.76    3.98
   1   4   6  138.44    4.00
   1   4   7  223.26    5.30
   1   4   7  219.60    5.57
   1   4   7  229.50    5.63
  -1   4  -7  216.69    5.52
   1  -4  -8   28.32    1.68
   1   4   8   28.91    1.64
   1   4   8   29.35    1.66
  -1   4  -8   29.20    1.66
   1  -4  -9   76.12    2.95
   1   4   9   79.78    2.91
   1   4   9   83.93    2.97
  -1   4  -9   79.31    2.92
   1  -4 -10  429.37    9.48
   1  -4 -10  426.95    9.56
   1   4  10  445.80    9.49
   1   4  10  446.62    9.51
  -1  -4  10  426.24    9.13
  -1   4 -10  460.09    9.60
  -1   4 -11  165.08    4.73
   1  -4 -11  168.54    4.74
   1  -4 -11  161.49    4.77
   1   4  11  159.92    4.61
  -1  -4  11  165.30    4.39
  -1   4 -11  174.91    4.76
  -1   4 -12  320.30    7.60
   1  -4 -12  308.14    7.51
   1  -4 -12  292.05    7.53
   1   4  12  319.25    7.46
   1  -4 -12  316.36    7.69
  -1  -4  12  320.00    7.15
  -1   4 -12  338.83    7.67
   1  -4 -13  234.42    6.22
   1  -4 -13  225.40    6.00
   1   4  13  228.14    5.97
  -1   4 -13  235.08    6.08
  -1  -4  13  229.55    5.58
  -1   4 -13  242.38    6.13
  -1   4 -14  213.66    5.72
  -1   4 -14  202.00    5.62
   1  -4 -14  200.44    5.59
   1   4  14  205.68    5.59
   1  -4 -14  200.91    5.75
  -1  -4  14  203.86    5.23
  -1   4 -15  182.44    5.22
  -1   4 -15  181.23    5.24
  -1  -4  15  175.42    4.76
   1  -4 -15  172.28    5.13
   1  -4 -15  175.30    5.30
   1   4  16  223.95    6.13
  -1   4 -16  224.27    6.16
  -1   4 -16  222.51    6.18
   1  -4 -16  232.09    6.19
  -1  -4  16  229.11    5.68
   1  -4 -16  219.65    6.24
  -1   4 -17  245.03    6.63
  -1  -4  17  247.72    6.09
   1  -4 -17  253.43    6.79
   1  -4 -17  240.09    6.59
   1   4  17  254.95    6.66
  -1   4 -17  244.59    6.58
  -1   4 -18   35.23    2.14
  -1   4 -18   33.87    2.12
   1   4  18   38.74    2.24
   1  -4 -18   35.97    2.14
  -1  -4  18   37.80    1.93
   1  -4 -18   35.98    2.24
  -1   4 -19  154.16    5.00
  -1   4 -19  159.37    5.09
   1  -4 -19  159.55    5.16
   1   4  19  164.69    5.13
   1  -4 -19  160.56    5.06
  -1  -4  19  167.43    4.62
   1   4  20   82.84    3.44
  -1   4 -20   78.65    3.41
   1  -4 -20   83.21    3.44
  -1   4 -20   85.10    3.43
  -1  -4  20   81.18    3.02
   1  -4 -20   80.55    3.49
  -1  -4  21  574.87   11.74
  -1   4 -21  556.18   12.35
  -1   4 -21  570.49   12.50
   1  -4 -21  567.35   12.37
   1   4  21  557.45   12.43
   1  -4 -21  544.87   12.48
  -1   4 -22  139.13    4.72
  -1   4 -22  145.86    4.88
   1  -4 -22  143.12    4.78
  -1  -4  22  149.14    4.43
   1   4  22  141.91    4.84
   1  -4 -22  140.49    4.90
   1  -4 -23   91.56    3.87
  -1   4 -23   91.40    3.67
  -1   4 -23   91.06    3.77
   1   4  23   95.47    3.84
   1  -4 -23   92.06    3.72
  -1  -4  23   99.58    3.45
   1  -4 -24  288.19    7.83
  -1   4 -24  287.88    7.59
  -1   4 -24  293.06    7.72
   1  -4 -24  298.86    7.67
  -1  -4  24  295.40    7.14
   1   4  24  287.75    7.77
  -1   4 -25  121.16    4.32
  -1  -4  25  124.97    4.02
  -1   4 -25  126.38    4.44
   1  -4 -25  123.02    4.35
   1   4  25  117.65    4.42
   1  -4 -25  120.47    4.49
  -1   4 -26   37.96    2.34
   1  -4 -26   40.44    2.46
  -1   4 -26   40.58    2.32
   1  -4 -26   40.84    2.39
   1   4  26   39.18    2.39
  -1  -4  26   40.42    2.16
  -1  -4  27   24.28    1.65
   1  -4 -27   26.34    2.00
  -1   4 -27   25.25    1.89
   1  -4 -27   23.82    1.80
  -1   4 -27   24.20    1.78
   1   4  27   24.47    1.85
  -1  -4  28   78.91    3.01
  -1   4 -28   81.09    3.36
  -1   4 -28   73.96    3.19
   1  -4 -28   74.90    3.22
   1   4  28   76.07    3.30
  -1   4 -29  207.90    5.91
   1  -4 -29  202.29    5.79
  -1  -4  29  209.53    5.54
  -1   4 -30    7.59    1.08
   1  -4 -30    6.00    0.95
  -1  -4  30    7.09    0.92
  -1  -4  31   81.82    2.99
  -1   4 -31   80.65    3.30
   1  -4 -31   82.97    3.20
  -1   4 -31   83.08    3.24
  -1   4 -32  122.76    4.02
  -1  -4  32  127.54    3.80
  -1   4 -32  129.69    4.23
   1  -4 -32  123.35    3.99
  -1  -4  33   36.17    1.79
  -1   4 -33   35.23    1.91
  -1   4 -33   36.44    2.03
   1  -4 -33   33.98    1.88
  -1  -4  34   52.69    2.11
  -1   4 -34   51.15    2.26
  -1   4 -34   57.59    2.44
   1  -4 -34   52.82    2.26
  -1   4 -35   11.25    1.00
  -1  -4  35   10.49    0.92
  -1   4 -35   11.25    1.07
   1  -4 -35   10.42    0.97
  -1  -4  36   46.62    1.83
  -1   4 -36   48.32    1.95
   1  -4 -36   50.37    1.97
  -1   4 -36   50.96    2.08
  -1   4 -37   57.90    2.11
  -1  -4  37   55.10    1.89
  -1   4 -37   53.41    1.96
   1  -4 -37   57.00    2.00
   1  -4 -37   54.20    2.12
  -1  -4  38   15.59    0.87
  -1   4 -38   17.87    1.04
   1  -4 -38   16.21    0.91
  -1   4 -38   16.40    0.93
   1  -4 -38   18.31    1.09
  -1   4 -39   29.39    1.20
  -1   4 -39   27.11    1.08
   1  -4 -39   28.37    1.08
   1  -4 -39   30.89    1.26
  -1   4 -40   12.10    0.64
   1  -4 -40   16.92    0.78
   1  -5  36   40.60    1.29
   1  -5  36   42.57    1.29
   1   5 -36   40.18    1.33
  -1  -5 -36   41.48    1.32
   1  -5  35   27.04    1.13
   1   5 -35   27.17    1.16
  -1  -5 -35   25.62    1.12
   1  -5  35   25.41    1.07
   1  -5  34    5.80    0.63
   1  -5  34    6.19    0.62
   1   5 -34    6.41    0.65
   1   5 -34    5.90    0.56
  -1  -5 -34    6.48    0.64
   1  -5  33   10.32    0.85
   1  -5  33   10.98    0.83
   1   5 -33   10.98    0.89
   1   5 -33   10.54    0.81
  -1  -5 -33   10.62    0.86
   1   5 -32   34.64    1.69
   1   5 -32   34.45    1.56
  -1  -5 -32   34.81    1.65
   1  -5  32   38.17    1.59
   1  -5  32   35.09    1.61
   1  -5  31   38.63    1.74
   1   5 -31   36.24    1.82
   1  -5  31   39.46    1.70
   1   5 -31   36.41    1.71
  -1  -5 -31   35.41    1.78
   1  -5  30    3.01    0.69
   1   5 -30    2.84    0.60
   1  -5  30    3.11    0.63
   1   5 -30    3.70    0.74
  -1  -5 -30    2.95    0.62
   1  -5  29    2.84    0.69
   1  -5  29    2.34    0.58
   1   5 -29    2.25    0.70
   1   5 -29    3.03    0.66
  -1  -5 -29    2.86    0.66
   1  -5  28    5.65    0.85
   1   5 -28    5.94    0.84
   1  -5  28    5.40    0.81
  -1  -5 -28    6.65    0.91
   1   5 -28    5.91    0.92
   1  -5  27    2.70    0.72
   1  -5  27    3.37    0.71
   1   5 -27    3.57    0.71
   1   5 -27    3.21    0.81
  -1  -5 -27    2.57    0.67
   1  -5  26    6.45    0.93
   1   5 -26    7.59    1.05
   1   5 -26    8.91    1.05
   1  -5  26    6.52    0.89
  -1  -5 -26    5.40    0.90
   1  -5  25    0.81    0.57
   1  -5  25   -0.10    0.60
   1   5 -25   -0.05    0.57
  -1  -5 -25    0.40    0.58
   1  -5  24    1.62    0.67
   1  -5  24    2.09    0.64
   1   5 -24    1.52    0.66
  -1  -5 -24    1.48    0.68
   1   5 -23   40.83    2.33
  -1  -5 -23   36.38    2.02
   1   5 -23   42.99    2.45
  -1  -5 -23   37.23    2.24
  -1   5  23   38.17    2.48
  -1   5  23   39.52    2.34
   1  -5  23   41.35    2.14
   1  -5  22   17.70    1.46
   1   5 -22   19.51    1.71
  -1  -5 -22   17.76    1.56
  -1  -5 -22   18.09    1.44
  -1   5  22   17.73    1.69
   1   5 -22   18.31    1.59
  -1   5  22   17.61    1.59
   1  -5  22   20.45    1.46
   1   5 -21  326.44    8.29
   1   5 -21  322.25    8.34
  -1  -5 -21  326.83    8.35
  -1   5  21  322.72    8.71
   1  -5  21  324.21    7.76
   1  -5  21  325.43    7.60
   1   5 -20  100.25    4.07
   1   5 -20  103.61    4.00
   1   5 -20  101.21    3.98
   1  -5  20  106.17    3.55
  -1  -5 -20  100.54    4.00
  -1   5  20  102.93    4.19
   1  -5  20  103.80    3.64
   1   5 -19  143.90    4.93
   1  -5  19  151.36    4.54
   1   5 -19  147.41    5.01
   1   5 -19  151.52    5.22
  -1  -5 -19  142.04    4.95
  -1   5  19  146.87    5.16
   1  -5  19  155.69    4.48
   1  -5  18   12.58    1.21
   1  -5  18   10.60    1.12
   1   5 -18   11.13    1.30
   1   5 -18   11.61    1.38
  -1  -5 -18   10.78    1.29
  -1   5  18   10.58    1.30
   1   5 -18   12.15    1.44
   1  -5  17   78.92    3.08
   1   5 -17   79.02    3.45
   1   5 -17   77.04    3.46
  -1   5  17   83.65    3.62
  -1  -5 -17   82.42    3.51
   1   5 -17   88.54    3.79
   1  -5  17   81.83    3.05
   1   5 -16  475.45   11.03
   1   5 -16  484.74   10.49
   1  -5  16  479.42   10.22
   1   5 -16  478.22   11.25
  -1  -5 -16  464.05   10.97
  -1   5  16  471.71   11.20
   1   5 -16  479.95   10.98
  -1   5  16  483.29   10.64
   1  -5  16  473.26   10.31
   1  -5  15   68.83    2.86
   1   5 -15   73.40    3.28
   1   5 -15   76.06    3.29
   1   5 -15   73.57    3.00
  -1   5  15   69.62    3.24
  -1  -5 -15   72.87    3.28
   1   5 -15   82.01    3.55
  -1   5  15   77.04    3.08
   1  -5  15   78.76    2.93
   1   5 -14   46.42    2.29
   1   5 -14   42.94    2.44
   1   5 -14   44.95    2.49
  -1  -5 -14   41.47    2.40
  -1   5  14   44.06    2.23
   1  -5  14   36.91    2.05
   1  -5  14   45.89    2.16
  -1   5  14   43.39    2.46
   1   5 -14   43.62    2.54
   1   5 -13  297.25    7.66
   1   5 -13  284.37    7.49
   1   5 -13  287.31    7.12
  -1  -5 -13  281.89    7.48
  -1   5  13  293.20    7.08
   1  -5  13  288.51    6.92
  -1   5  13  282.11    7.59
   1   5 -13  295.55    7.74
   1   5 -12    1.03    0.60
   1  -5  12    1.89    0.64
   1   5 -12    1.00    0.72
   1  -5  12    1.27    0.62
   1   5 -12    0.65    0.62
   1   5 -12    1.41    0.72
  -1  -5 -12    1.31    0.64
  -1   5  12    1.13    0.62
  -1   5  12    1.49    0.57
   1  -5  11  289.36    6.94
   1   5 -11  290.86    7.53
   1   5 -11  279.74    7.00
   1   5 -11  285.13    7.03
  -1  -5 -11  286.09    7.43
  -1   5  11  290.38    7.53
  -1   5  11  296.50    6.96
   1  -5  11  297.24    6.96
   1   5 -11  303.78    7.58
   1   5 -10   81.15    3.32
   1  -5  10   78.09    2.92
   1   5 -10   84.52    3.11
   1   5 -10   82.44    3.05
  -1  -5 -10   76.85    3.21
  -1   5  10   79.99    3.26
  -1   5  10   80.33    2.90
   1  -5  10   80.46    2.97
   1   5  -9   72.02    3.04
   1  -5   9   69.18    2.68
   1  -5   9   69.47    2.73
   1   5  -9   66.69    2.70
   1   5  -9   72.86    2.90
  -1  -5  -9   64.82    2.90
  -1   5   9   73.45    3.05
  -1   5   9   69.62    2.62
   1   5  -8  133.82    4.07
   1  -5   8  134.09    4.06
   1   5  -8  140.18    4.22
  -1  -5  -8  132.36    4.37
  -1   5   8  140.63    4.46
  -1   5   8  134.44    3.92
   1  -5   8  132.66    3.98
   1   5  -8  139.36    4.45
   1  -5   7   17.17    1.29
   1   5  -7   18.29    1.36
  -1  -5  -7   17.50    1.45
  -1   5   7   19.24    1.51
  -1   5   7   19.39    1.27
  -1  -5  -7   17.91    1.46
   1   5  -7   18.74    1.40
   1  -5   7   18.64    1.36
   1   5  -7   18.11    1.50
   1   5  -6   79.72    3.00
   1   5  -6   83.42    2.96
   1  -5   6   82.52    2.99
   1  -5   6   81.68    2.91
  -1  -5  -6   77.15    3.10
  -1  -5  -6   78.57    3.14
  -1   5   6   82.67    3.23
   1   5  -6   81.78    3.21
   1  -5   5   30.18    1.73
   1   5  -5   29.70    1.74
  -1  -5  -5   27.32    1.78
  -1   5   5   30.06    1.85
  -1  -5  -5   25.59    1.72
   1   5  -5   30.48    1.88
   1  -5   5   29.12    1.65
   1  -5   4   31.56    1.73
   1   5  -4   32.54    1.74
   1   5  -4   34.60    1.89
  -1  -5  -4   34.03    1.95
  -1   5   4   35.98    2.02
  -1  -5  -4   32.00    1.91
   1  -5   4   33.69    1.87
   1   5  -4   36.06    2.02
   1  -5   3  534.13   11.24
   1  -5   3  521.38   10.94
  -1   5   3  564.75   11.65
  -1  -5  -3  521.62   11.32
   1   5  -3  560.04   11.33
   1  -5   3  524.29   11.36
   1   5  -3  554.99   11.57
   1   5  -3  538.26   11.00
   1  -5   2   53.04    2.50
   1   5  -2   56.64    2.31
   1   5  -2   55.88    2.54
   1  -5   2   50.76    2.35
  -1  -5  -2   52.01    2.43
  -1   5   2   54.20    2.51
   1   5  -2   58.11    2.47
   1  -5   2   50.85    2.19
   1  -5   1   16.16    1.42
   1   5  -1   14.93    1.33
  -1  -5  -1   14.18    1.28
   1   5  -1   16.61    1.35
  -1   5   1   14.52    1.31
   1  -5   1   16.61    1.36
   1   5  -1   17.05    1.27
   1   5   0  404.69    8.70
   1  -5   0  412.70    9.26
  -1  -5   0  384.34    8.70
  -1   5   0  419.17    9.31
   1   5   0  419.40    9.27
   1   5   0  417.47    9.12
  -1  -5   0  394.54    9.01
   1  -5   0  410.23    9.04
   1  -5  -1   15.91    1.39
   1   5   1   15.97    1.21
   1   5   1   17.09    1.41
   1   5   1   16.16    1.31
   1  -5  -1   16.34    1.36
  -1  -5   1   16.15    1.34
  -1  -5   1   16.20    1.23
  -1   5  -1   15.82    1.34
   1   5   2   55.38    2.46
  -1   5  -2   58.58    2.61
  -1  -5   2   53.98    2.43
   1  -5  -2   52.70    2.44
   1   5   2   57.30    2.58
   1   5   2   52.94    2.22
   1   5   3  530.26   11.00
  -1   5  -3  549.04   11.64
  -1  -5   3  548.21   11.42
   1   5   3  553.45   11.66
   1  -5  -3  545.95   11.49
   1   5   3  553.88   11.50
  -1  -5   4   33.05    1.87
  -1   5  -4   34.99    1.99
   1  -5  -4   33.40    1.93
   1   5   4   35.54    2.01
   1  -5  -4   33.87    1.95
   1   5   4   33.53    1.93
  -1  -5   5   31.20    1.80
   1  -5  -5   31.74    1.88
   1   5   5   32.09    1.91
   1  -5  -5   28.22    1.80
   1   5   5   31.46    1.86
  -1   5  -5   30.74    1.88
   1   5   6   79.00    3.16
   1  -5  -6   84.16    3.21
   1   5   6   86.67    3.30
   1  -5  -6   81.46    3.17
  -1  -5   6   84.26    3.10
  -1   5  -6   87.15    3.31
  -1  -5   7   19.59    1.43
   1  -5  -7   19.91    1.50
   1   5   7   20.20    1.56
   1  -5  -7   19.84    1.52
   1   5   7   19.59    1.52
  -1   5  -7   18.55    1.49
  -1  -5   8  137.65    4.19
   1  -5  -8  133.97    4.35
   1   5   8  135.88    4.39
   1   5   8  136.31    4.38
  -1   5  -8  139.48    4.47
  -1   5  -9   71.90    3.05
   1  -5  -9   69.73    2.96
   1   5   9   71.39    3.01
   1   5   9   70.47    2.98
  -1  -5   9   70.96    2.81
  -1   5 -10   78.04    3.29
   1  -5 -10   81.65    3.27
   1   5  10   75.06    3.20
   1   5  10   85.55    3.34
  -1  -5  10   84.66    3.10
  -1   5 -10   87.35    3.39
  -1   5 -11  309.35    7.68
  -1   5 -11  287.80    7.56
   1  -5 -11  284.09    7.44
   1   5  11  291.07    7.51
   1   5  11  300.13    7.52
  -1  -5  11  315.58    7.25
  -1   5 -12    2.08    0.75
  -1  -5  12    2.06    0.71
  -1   5 -12    0.99    0.70
   1  -5 -12    1.12    0.64
   1   5  12    1.05    0.60
   1   5  12    0.91    0.64
  -1   5 -13  282.44    7.52
   1  -5 -13  286.19    7.43
   1   5  13  283.18    7.48
   1   5  13  291.73    7.48
  -1  -5  13  296.98    7.08
  -1   5 -13  299.04    7.65
  -1   5 -14   45.60    2.49
  -1   5 -14   45.31    2.50
   1  -5 -14   48.83    2.52
   1   5  14   42.58    2.40
   1   5  14   43.98    2.45
  -1  -5  14   47.94    2.27
  -1   5 -15   73.29    3.28
   1  -5 -15   78.52    3.30
   1   5  15   77.24    3.33
  -1   5 -15   76.43    3.34
   1   5  15   73.25    3.23
  -1  -5  15   77.01    2.99
  -1   5 -16  479.99   10.94
  -1   5 -16  461.96   10.92
   1  -5 -16  469.82   10.81
   1   5  16  462.78   10.86
   1   5  16  469.46   10.87
  -1  -5  16  485.90   10.30
  -1   5 -17   84.17    3.53
  -1   5 -17   81.81    3.51
   1  -5 -17   81.91    3.44
   1   5  17   81.65    3.49
   1   5  17   71.88    3.30
  -1  -5  17   86.62    3.18
  -1   5 -18    9.94    1.24
  -1  -5  18   12.23    1.21
  -1   5 -18   14.17    1.46
   1  -5 -18   12.34    1.32
   1   5  18   11.42    1.30
  -1   5 -19  151.10    5.01
  -1   5 -19  151.08    5.08
  -1  -5  19  154.59    4.59
   1  -5 -19  147.43    4.94
   1   5  19  143.32    4.98
  -1   5 -20  107.15    4.07
   1  -5 -20  103.06    3.93
   1   5  20  102.81    4.06
  -1  -5  20  109.37    3.65
  -1   5 -20  101.44    3.95
  -1   5 -21  325.14    8.20
  -1  -5  21  335.73    7.69
  -1   5 -21  323.53    8.28
   1  -5 -21  326.03    8.20
   1   5  21  306.94    8.31
   1   5  21  323.28    8.41
  -1   5 -22   17.85    1.56
  -1   5 -22   20.86    1.74
  -1  -5  22   19.63    1.48
   1  -5 -22   19.29    1.63
   1  -5 -22   22.26    1.88
   1   5  22   17.20    1.64
   1   5  22   17.97    1.68
  -1  -5  23   43.99    2.18
  -1   5 -23   46.10    2.51
  -1   5 -23   39.34    2.29
   1   5  23   37.65    2.38
   1  -5 -23   38.68    2.29
   1  -5 -23   42.77    2.53
   1   5  23   36.96    2.36
  -1  -5  24    1.94    0.67
   1  -5 -24    0.92    0.69
  -1   5 -24    1.91    0.72
   1  -5 -24    1.51    0.64
  -1  -5  25    0.07    0.55
   1  -5 -25    0.30    0.60
  -1   5 -25    0.46    0.59
   1  -5 -25    0.31    0.57
  -1   5 -26    7.97    1.06
   1  -5 -26    7.77    1.02
   1  -5 -26    7.55    1.12
  -1  -5  26    7.57    0.98
  -1  -5  27    2.64    0.70
   1  -5 -27    3.99    0.92
  -1   5 -27    2.39    0.74
   1  -5 -27    3.39    0.75
  -1  -5  28    6.27    0.85
   1  -5 -28    5.40    0.95
  -1   5 -28    6.30    0.98
   1  -5 -28    5.86    0.85
  -1  -5  29    3.08    0.65
   1  -5 -29    3.91    0.79
  -1   5 -29    2.71    0.71
   1  -5 -29    2.37    0.60
  -1  -5  30    3.93    0.68
   1  -5 -30    3.43    0.77
  -1   5 -30    3.16    0.69
   1  -5 -30    2.70    0.60
  -1  -5  31   39.85    1.74
  -1   5 -31   37.24    1.85
  -1   5 -31   40.84    2.04
   1  -5 -31   38.51    1.82
   1  -5 -31   37.93    1.94
  -1  -5  32   37.44    1.62
  -1   5 -32   34.27    1.69
  -1   5 -32   38.23    1.87
   1  -5 -32   36.29    1.67
   1  -5 -32   35.26    1.82
  -1  -5  33   10.99    0.85
  -1   5 -33   10.09    0.88
  -1   5 -33   11.64    1.01
   1  -5 -33   10.26    0.85
   1  -5 -33   12.29    1.01
  -1   5 -34    6.98    0.69
  -1   5 -34    7.23    0.76
   1  -5 -34    6.05    0.62
   1  -5 -34    7.68    0.76
  -1  -5  34    7.09    0.67
  -1  -5  35   25.41    1.09
  -1   5 -35   27.87    1.20
   1  -5 -35   27.12    1.15
  -1   5 -35   28.92    1.32
  -1   5 -36   39.45    1.34
   1  -5 -36   42.98    1.35
   1  -5 -36   45.84    1.36
  -1  -5  36   41.63    1.30
  -1   5 -36   49.31    1.60
  -1   5 -37    1.83    0.28
   1  -6  32    5.64    0.42
   1  -6  32    6.88    0.46
   1   6 -32    6.04    0.46
  -1  -6 -32    6.57    0.47
   1  -6  31    0.53    0.29
  -1  -6 -31    0.85    0.30
   1  -6  31    0.80    0.29
   1   6 -31    0.98    0.31
  -1  -6 -31    0.65    0.27
   1  -6  30   15.85    0.88
   1  -6  30   15.72    0.87
   1   6 -30   14.27    0.91
  -1  -6 -30   14.95    0.88
  -1  -6 -30   15.62    0.90
   1  -6  29    7.81    0.68
   1   6 -29    6.06    0.53
  -1  -6 -29    7.50    0.69
  -1  -6 -29    7.61    0.71
   1  -6  29    7.75    0.70
   1   6 -29    7.53    0.75
   1  -6  28   15.19    0.98
   1  -6  28   16.59    1.00
   1   6 -28   15.34    1.08
   1   6 -28   12.52    0.84
  -1  -6 -28   14.81    1.01
  -1  -6 -28   14.90    1.01
   1  -6  27    3.66    0.60
   1  -6  27    3.71    0.59
  -1  -6 -27    3.78    0.62
   1   6 -27    3.13    0.52
   1   6 -27    3.52    0.64
  -1  -6 -27    3.31    0.57
   1  -6  26   45.90    1.84
   1   6 -26   41.90    1.97
   1   6 -26   39.27    1.71
  -1  -6 -26   41.98    1.90
  -1  -6 -26   41.52    1.87
   1  -6  26   42.07    1.79
   1  -6  25   10.84    0.96
   1   6 -25   10.56    1.06
   1   6 -25    8.61    0.85
  -1  -6 -25   10.09    0.97
  -1  -6 -25    9.06    0.94
   1  -6  25   11.24    0.97
   1  -6  24   15.37    1.17
   1  -6  24   16.63    1.18
   1   6 -24   15.11    1.28
  -1  -6 -24   14.33    1.18
   1  -6  23   22.56    1.39
  -1  -6 -23   21.42    1.49
   1   6 -23   23.19    1.62
   1  -6  23   22.25    1.41
   1   6 -22    8.00    1.04
  -1  -6 -22    8.23    0.98
   1  -6  22    7.99    0.94
   1  -6  22    8.26    0.92
   1  -6  21   10.14    1.07
   1   6 -21   10.58    1.21
   1  -6  21   11.55    1.09
  -1  -6 -21   10.52    1.13
   1   6 -20   12.30    1.31
   1  -6  20   13.46    1.21
  -1  -6 -20   13.91    1.32
   1  -6  20   15.70    1.23
   1  -6  19   22.81    1.55
   1   6 -19   25.50    1.86
  -1  -6 -19   24.21    1.73
  -1  -6 -19   24.46    1.74
   1  -6  19   27.10    1.61
   1  -6  18   67.03    2.73
   1  -6  18   75.91    2.81
  -1  -6 -18   66.76    3.00
  -1  -6 -18   72.23    3.08
   1   6 -18   73.50    3.20
   1  -6  17   13.92    1.25
   1   6 -17   15.36    1.51
  -1  -6 -17   15.24    1.44
  -1  -6 -17   14.94    1.46
   1  -6  17   14.74    1.24
   1  -6  16   23.68    1.59
   1   6 -16   23.78    1.80
   1   6 -16   24.24    1.87
  -1  -6 -16   24.68    1.80
  -1   6  16   27.04    1.96
  -1  -6 -16   23.69    1.78
   1  -6  16   24.32    1.58
   1   6 -15   27.20    1.95
   1  -6  15   31.70    1.84
  -1  -6 -15   28.21    1.95
  -1   6  15   29.07    2.03
  -1  -6 -15   32.51    2.08
   1  -6  15   31.89    1.80
   1   6 -15   29.48    2.04
   1  -6  14   18.60    1.46
  -1  -6 -14   20.10    1.64
  -1   6  14   18.49    1.62
  -1  -6 -14   19.75    1.65
   1  -6  14   19.10    1.43
   1   6 -14   16.98    1.56
   1   6 -14   18.33    1.64
   1   6 -13   56.00    2.86
  -1  -6 -13   56.11    2.82
  -1   6  13   58.60    2.90
  -1  -6 -13   56.94    2.81
   1  -6  13   54.69    2.49
   1   6 -13   58.41    2.95
   1   6 -13   57.12    2.86
   1  -6  13   56.67    2.48
   1   6 -12   43.35    2.48
   1  -6  12   42.11    2.17
   1   6 -12   47.40    2.64
   1   6 -12   42.28    2.49
   1   6 -12   41.87    2.16
  -1  -6 -12   43.23    2.42
  -1   6  12   42.96    2.47
  -1  -6 -12   39.87    2.35
   1  -6  12   43.23    2.18
   1  -6  11   30.49    1.85
   1   6 -11   32.39    1.92
   1   6 -11   31.79    2.11
  -1  -6 -11   31.36    2.10
  -1   6  11   31.57    2.10
  -1  -6 -11   31.81    2.09
   1  -6  11   36.85    1.97
   1   6 -11   31.76    2.14
   1   6 -11   32.46    2.18
   1  -6  10   43.97    2.25
   1   6 -10   48.82    2.63
   1  -6  10   42.84    2.11
   1   6 -10   54.29    2.81
   1  -6  10   50.85    2.39
  -1  -6 -10   51.59    2.63
  -1   6  10   45.35    2.53
  -1  -6 -10   46.96    2.52
   1   6 -10   47.39    2.61
   1   6 -10   50.37    2.39
   1  -6   9   33.77    1.99
   1   6  -9   36.57    2.25
   1  -6   9   35.15    1.86
   1   6  -9   37.14    2.30
   1   6  -9   38.58    2.08
  -1   6   9   36.03    2.23
  -1  -6  -9   34.72    2.16
   1  -6   9   38.56    2.07
   1   6  -8   41.18    2.40
   1  -6   8   37.32    1.93
   1   6  -8   44.13    2.22
  -1  -6  -8   38.70    2.28
  -1   6   8   41.47    2.40
   1  -6   8   43.49    2.23
   1   6  -7  182.96    5.05
   1  -6   7  181.65    5.07
  -1  -6  -7  169.44    5.22
  -1   6   7  168.40    5.34
   1   6  -7  175.17    5.44
   1   6  -6   94.24    3.72
   1  -6   6   83.07    3.07
   1  -6   6   97.84    3.49
   1   6  -6   95.61    3.39
  -1   6   6   91.25    3.66
  -1  -6  -6   88.79    3.52
   1   6  -5   35.87    1.99
   1  -6   5   30.66    1.76
  -1  -6  -5   35.13    2.00
  -1   6   5   32.36    2.11
   1  -6   5   39.57    2.14
  -1  -6  -5   35.93    2.16
   1   6  -5   34.93    2.18
  -1   6   4  389.59    9.31
   1   6  -4  396.74    8.78
   1  -6   4  412.54    9.00
  -1  -6  -4  391.40    9.09
   1   6  -4  391.73    9.33
  -1  -6  -4  374.39    8.70
  -1  -6  -3  368.16    8.47
   1   6  -3  390.28    8.54
   1   6  -3  377.15    8.65
   1  -6   3  385.55    8.70
  -1   6   3  378.61    9.07
  -1  -6  -3  365.30    8.74
   1   6  -3  377.83    9.07
   1  -6   2   17.40    1.51
  -1  -6  -2   15.55    1.44
   1   6  -2   16.70    1.38
   1  -6   2   14.09    1.21
   1   6  -2   16.09    1.50
  -1   6   2   15.74    1.48
   1   6  -2   17.82    1.46
  -1  -6  -2   15.13    1.36
   1  -6   1  106.73    3.58
   1  -6   1  123.70    4.12
   1   6  -1  121.05    4.28
   1   6  -1  129.54    3.96
  -1  -6  -1  124.14    3.97
  -1   6   1  120.14    4.28
   1   6  -1  120.14    4.04
  -1  -6  -1  119.98    4.09
   1  -6   0   61.73    2.57
  -1   6   0   75.23    3.23
   1   6   0   74.77    3.22
   1   6   0   72.02    2.99
   1  -6   0   76.34    3.08
  -1  -6   0   70.89    3.00
  -1  -6   0   70.58    2.85
   1   6   1  119.19    4.22
  -1  -6   1  121.47    4.05
   1   6   1  121.53    4.06
  -1   6  -1  117.19    4.22
  -1  -6   1  118.65    3.82
   1  -6  -1  127.82    4.19
   1  -6  -2   12.93    1.18
  -1  -6   2   15.17    1.30
   1   6   2   14.29    1.42
   1   6   2   16.88    1.45
  -1  -6   2   16.84    1.46
  -1   6  -2   14.75    1.44
   1  -6  -2   15.99    1.48
   1  -6  -3  349.19    8.84
   1   6   3  373.64    8.78
  -1   6  -3  375.55    9.05
  -1  -6   3  377.74    8.68
   1   6   3  366.57    8.97
   1  -6  -3  375.99    8.79
  -1  -6   3  359.70    8.20
   1   6   4  387.11    9.30
  -1  -6   4  388.06    9.00
   1   6   4  386.03    9.10
   1  -6  -4  397.48    9.16
  -1   6  -4  402.28    9.46
   1  -6  -4  393.85    9.38
  -1  -6   4  374.78    8.50
  -1   6  -5   35.92    2.21
  -1  -6   5   38.62    2.13
  -1  -6   5   34.19    1.82
   1   6   5   36.74    2.16
   1  -6  -5   35.33    2.15
   1   6   5   37.80    2.25
   1  -6  -5   39.86    2.37
  -1  -6   6   88.52    3.08
  -1  -6   6   97.61    3.54
   1  -6  -6   96.45    3.64
   1   6   6   92.07    3.58
   1   6   6   97.51    3.75
  -1   6  -6   98.22    3.83
   1  -6  -6  102.89    3.89
  -1   6  -7  179.74    5.55
  -1  -6   7  182.06    5.18
   1  -6  -7  178.82    5.32
   1   6   7  170.82    5.23
   1   6   7  177.21    5.42
  -1  -6   8   40.21    2.19
   1  -6  -8   41.07    2.30
   1   6   8   38.49    2.21
   1   6   8   40.01    2.31
  -1   6  -8   43.92    2.47
  -1   6  -9   37.87    2.31
  -1  -6   9   41.20    2.16
   1   6   9   37.71    2.25
   1  -6  -9   37.50    2.20
   1   6   9   38.52    2.21
  -1   6  -9   36.84    2.28
  -1   6 -10   48.71    2.64
  -1   6 -10   49.87    2.67
   1  -6 -10   50.05    2.55
   1   6  10   48.36    2.56
   1  -6 -10   50.36    2.54
   1   6  10   43.71    2.39
  -1  -6  10   48.73    2.37
  -1   6 -11   31.55    2.10
  -1   6 -11   32.96    2.18
   1  -6 -11   32.04    2.08
   1   6  11   31.01    2.03
   1  -6 -11   31.81    2.02
   1   6  11   32.08    2.02
  -1  -6  11   30.72    1.88
  -1   6 -12   42.33    2.52
   1  -6 -12   39.51    2.32
   1   6  12   42.75    2.42
   1  -6 -12   41.10    2.32
   1   6  12   42.20    2.35
  -1  -6  12   41.95    2.20
  -1   6 -12   43.18    2.47
  -1   6 -13   54.98    2.81
  -1   6 -13   55.85    2.87
   1  -6 -13   55.36    2.75
   1   6  13   53.51    2.72
   1  -6 -13   57.93    2.74
   1   6  13   53.41    2.69
  -1  -6  13   59.91    2.58
  -1   6 -14   19.91    1.65
   1  -6 -14   17.43    1.51
   1   6  14   16.59    1.52
   1  -6 -14   16.27    1.48
   1   6  14   18.18    1.54
  -1   6 -14   17.11    1.58
  -1  -6  14   18.57    1.43
  -1   6 -15   32.04    2.09
  -1   6 -15   30.61    2.08
   1  -6 -15   33.38    2.06
   1   6  15   30.06    2.04
   1  -6 -15   30.85    1.99
   1   6  15   29.66    1.98
  -1  -6  15   33.11    1.88
  -1   6 -16   23.68    1.81
  -1   6 -16   24.56    1.86
   1  -6 -16   22.80    1.70
   1   6  16   24.41    1.80
   1  -6 -16   23.69    1.75
   1   6  16   22.98    1.76
  -1  -6  16   27.18    1.69
  -1   6 -17   15.51    1.48
   1  -6 -17   14.79    1.37
   1  -6 -17   14.88    1.40
  -1  -6  17   15.19    1.29
  -1   6 -18   71.41    3.19
   1  -6 -18   72.23    3.07
   1  -6 -18   70.20    3.01
  -1  -6  18   77.24    2.90
   1  -6 -19   22.31    1.65
   1  -6 -19   26.04    1.76
  -1   6 -19   23.32    1.78
  -1  -6  19   27.01    1.64
  -1   6 -20   14.76    1.41
   1  -6 -20   14.13    1.30
  -1  -6  20   15.40    1.25
   1  -6 -20   15.07    1.36
  -1   6 -21   12.16    1.28
   1  -6 -21   10.84    1.16
   1  -6 -21   11.55    1.18
  -1  -6  21   10.34    1.07
  -1  -6  22    8.11    0.95
   1  -6 -22    7.81    0.96
  -1   6 -22    7.06    1.00
  -1   6 -23   23.64    1.63
   1  -6 -23   22.85    1.53
   1  -6 -23   20.94    1.46
  -1  -6  23   23.72    1.46
  -1  -6  24   15.38    1.15
  -1   6 -24   16.19    1.35
   1  -6 -24   15.30    1.23
   1  -6 -24   15.68    1.24
  -1  -6  25   11.51    0.99
  -1   6 -25    9.83    1.03
   1  -6 -25    9.57    0.96
   1  -6 -25    9.26    0.95
  -1  -6  26   44.64    1.86
  -1   6 -26   44.98    2.04
   1  -6 -26   43.70    1.91
   1  -6 -26   43.23    1.90
   1  -6 -27    3.78    0.63
  -1  -6  27    4.05    0.63
  -1   6 -27    3.91    0.68
   1  -6 -27    3.35    0.59
  -1   6 -28   14.98    1.07
   1  -6 -28   15.03    1.02
   1  -6 -28   14.58    0.99
  -1  -6  28   15.01    0.97
  -1  -6  29    7.78    0.69
  -1   6 -29    7.59    0.74
  -1   6 -29    6.25    0.81
   1  -6 -29    7.58    0.68
   1  -6 -29    7.43    0.70
  -1  -6  30   16.92    0.90
  -1   6 -30   16.06    0.96
  -1   6 -30   16.52    1.08
   1  -6 -30   15.87    0.90
   1  -6 -30   15.98    0.91
  -1  -6  31    0.59    0.26
   1  -6 -31    1.04    0.30
  -1   6 -31    1.03    0.37
  -1   6 -31    0.71    0.28
   1  -6 -31    0.67    0.26
  -1  -6  32    6.01    0.43
   1  -6 -32    6.88    0.47
  -1   6 -33    3.49    0.36
  -1  -7 -26    8.11    0.51
   1  -7  26    6.64    0.45
   1  -7  26    8.41    0.51
   1   7 -26    7.31    0.51
   1  -7  25    8.76    0.58
  -1  -7 -25   10.20    0.65
   1   7 -25    9.39    0.65
  -1  -7 -25    9.03    0.54
   1  -7  25   10.93    0.64
   1  -7  24    5.06    0.50
   1  -7  24    6.63    0.58
   1   7 -24    5.87    0.59
  -1  -7 -24    6.33    0.57
  -1  -7 -24    5.12    0.47
   1  -7  23    8.58    0.66
   1   7 -23    8.35    0.73
  -1  -7 -23    9.09    0.72
  -1  -7 -23    8.61    0.64
   1  -7  23    8.72    0.69
   1  -7  22    2.33    0.45
  -1  -7 -22    2.85    0.47
  -1  -7 -22    3.17    0.54
   1  -7  22    2.99    0.50
   1   7 -22    3.29    0.55
   1  -7  21   23.80    1.19
   1   7 -21   21.03    1.27
  -1  -7 -21   21.66    1.21
   1  -7  21   19.59    1.09
  -1  -7 -21   20.19    1.10
   1  -7  20   21.20    1.18
   1  -7  20   18.32    1.08
   1   7 -20   20.20    1.30
  -1  -7 -20   17.91    1.17
  -1  -7 -20   18.17    1.09
   1  -7  19   27.15    1.37
   1   7 -19   26.98    1.59
  -1  -7 -19   28.67    1.52
   1  -7  19   31.69    1.48
  -1  -7 -19   29.65    1.44
  -1  -7 -18    3.57    0.61
   1  -7  18    2.72    0.55
  -1  -7 -18    2.91    0.64
   1  -7  18    3.68    0.63
   1   7 -18    3.93    0.75
   1   7 -17   20.23    1.46
   1  -7  17   21.79    1.28
   1  -7  17   19.41    1.23
  -1  -7 -17   21.85    1.40
  -1  -7 -17   19.82    1.26
  -1  -7 -16    2.75    0.61
   1  -7  16    2.41    0.59
   1  -7  16    3.48    0.64
  -1  -7 -16    2.26    0.67
   1   7 -16    2.63    0.69
   1  -7  15    2.19    0.55
  -1  -7 -15    2.53    0.65
   1  -7  15    3.40    0.65
   1   7 -15    3.01    0.76
  -1  -7 -15    2.79    0.62
  -1  -7 -14    0.89    0.50
   1  -7  14    1.79    0.56
  -1  -7 -14    1.86    0.66
   1  -7  14    1.14    0.54
   1   7 -14    1.46    0.67
   1  -7  13    4.38    0.76
  -1  -7 -13    5.40    0.80
  -1  -7 -13    6.84    0.94
   1  -7  13    5.25    0.76
   1   7 -13    5.97    0.97
   1  -7  12   51.93    2.23
   1   7 -12   59.85    2.71
   1  -7  12   60.69    2.39
  -1  -7 -12   56.66    2.55
  -1  -7 -12   57.13    2.39
   1  -7  11   32.43    1.76
  -1  -7 -11   36.22    2.00
   1   7 -11   35.21    2.09
  -1  -7 -11   34.95    1.86
   1  -7  11   39.74    1.92
   1   7 -10   16.51    1.48
  -1  -7 -10   16.98    1.41
   1  -7  10   18.36    1.35
   1  -7  10   19.42    1.38
  -1  -7 -10   17.79    1.34
   1  -7   9   48.12    2.20
  -1  -7  -9   51.82    2.28
   1   7  -9   46.53    2.49
   1  -7   9   51.61    2.28
  -1  -7  -9   50.27    2.42
   1  -7   8   88.44    3.13
   1   7  -8   88.90    3.53
   1  -7   8   96.71    3.26
  -1  -7  -8   90.01    3.37
  -1  -7  -8   93.85    3.23
   1  -7   7   25.82    1.61
  -1  -7  -7   27.90    1.82
   1   7  -7   28.85    1.92
   1  -7   7   30.22    1.74
  -1  -7  -7   26.63    1.65
   1  -7   6   96.67    3.34
   1  -7   6  107.50    3.49
   1   7  -6   97.96    3.73
  -1  -7  -6   98.35    3.55
  -1  -7  -6   97.45    3.36
   1  -7   5    8.77    1.05
   1  -7   5    9.34    0.89
   1   7  -5    8.32    1.13
  -1  -7  -5    9.28    1.09
   1  -7   5    9.52    1.06
  -1  -7  -5   10.63    1.07
   1  -7   4   13.01    1.04
  -1  -7  -4   15.08    1.38
   1  -7   4   16.28    1.36
  -1  -7  -4   14.66    1.24
   1  -7   4   15.09    1.32
   1  -7   3   23.91    1.40
  -1  -7  -3   27.16    1.77
   1  -7   3   28.12    1.72
  -1  -7  -3   28.31    1.63
   1  -7   3   23.34    1.63
   1  -7   2   33.56    1.90
  -1  -7  -2   31.31    1.91
  -1  -7  -2   33.99    1.77
  -1  -7  -1    3.95    0.72
   1  -7   1    2.79    0.59
  -1  -7  -1    2.67    0.73
   1  -7   1    2.70    0.77
   1  -7   0   22.05    1.37
  -1  -7   0   25.72    1.70
  -1  -7   0   26.15    1.54
   1  -7   0   26.54    1.70
   1  -7  -1    1.65    0.54
  -1  -7   1    2.85    0.64
   1  -7  -1    2.10    0.76
  -1  -7   1    2.43    0.75
   1  -7  -2   27.22    1.52
   1  -7  -2   33.25    1.92
  -1  -7   2   31.02    1.83
  -1  -7   2   31.53    1.65
  -1  -7   3   28.09    1.53
   1  -7  -3   25.38    1.45
  -1  -7   3   27.26    1.74
   1  -7  -3   29.93    1.81
  -1  -7   4   15.49    1.13
   1  -7  -4   15.06    1.34
  -1  -7   4   16.31    1.34
   1  -7  -4   13.31    1.07
   1  -7  -5    8.24    0.88
  -1   7  -5    9.74    1.23
   1  -7  -5   10.81    1.16
  -1  -7   5    9.96    1.10
  -1   7  -6  104.47    3.84
   1  -7  -6  104.31    3.56
  -1  -7   6  105.64    3.48
   1  -7  -7   25.38    1.47
   1  -7  -7   28.12    1.79
  -1   7  -7   26.62    1.88
  -1  -7   7   29.21    1.73
   1  -7  -8   99.59    3.43
  -1   7  -8   95.42    3.62
  -1  -7   8   92.49    3.19
   1  -7  -9   44.68    1.97
  -1   7  -9   49.98    2.54
  -1  -7   9   50.59    2.24
   1  -7  -9   50.98    2.38
   1  -7  -9   45.66    2.40
   1  -7 -10   18.46    1.54
   1  -7 -10   16.72    1.18
  -1   7 -10   18.12    1.54
   1  -7 -10   18.72    1.45
  -1  -7  10   18.25    1.33
   1  -7 -11   31.76    1.62
  -1  -7  11   39.25    1.91
   1  -7 -11   36.45    1.96
   1  -7 -11   34.57    2.05
  -1   7 -11   35.78    2.11
   1  -7 -12   52.55    2.12
   1  -7 -12   56.72    2.59
  -1   7 -12   57.59    2.68
  -1  -7  12   59.13    2.36
   1  -7 -12   57.94    2.48
   1  -7 -13    5.24    0.70
   1  -7 -13    5.98    0.88
  -1  -7  13    5.70    0.82
  -1   7 -13    4.17    0.88
   1  -7 -13    5.28    0.96
   1  -7 -14    1.43    0.71
   1  -7 -14    1.29    0.60
  -1  -7  14    1.48    0.57
  -1   7 -14    1.40    0.66
   1  -7 -14    0.96    0.45
   1  -7 -15    2.79    0.76
   1  -7 -15    2.21    0.49
   1  -7 -15    3.39    0.74
  -1  -7  15    2.14    0.58
  -1   7 -15    3.05    0.72
   1  -7 -16    3.07    0.53
   1  -7 -16    2.78    0.67
   1  -7 -16    2.98    0.76
  -1  -7  16    2.68    0.63
  -1   7 -16    2.77    0.70
   1  -7 -17   24.06    1.53
   1  -7 -17   19.35    1.11
  -1   7 -17   19.96    1.45
   1  -7 -17   21.91    1.38
  -1  -7  17   21.91    1.30
   1  -7 -18    2.78    0.48
   1  -7 -18    2.90    0.61
  -1  -7  18    3.74    0.65
  -1   7 -18    2.89    0.67
   1  -7 -18    3.23    0.67
  -1  -7  19   30.52    1.46
   1  -7 -19   29.42    1.58
   1  -7 -19   25.01    1.18
  -1   7 -19   28.55    1.62
   1  -7 -19   27.80    1.48
  -1  -7  20   18.21    1.10
   1  -7 -20   17.04    0.90
  -1   7 -20   18.55    1.25
   1  -7 -20   18.41    1.16
   1  -7 -20   19.31    1.27
   1  -7 -21   18.58    0.91
  -1   7 -21   21.84    1.30
  -1  -7  21   23.37    1.19
   1  -7 -21   22.75    1.22
   1  -7 -21   22.98    1.30
   1  -7 -22    3.34    0.59
   1  -7 -22    2.12    0.31
   1  -7 -22    2.96    0.50
  -1  -7  22    3.21    0.51
  -1   7 -22    3.12    0.56
   1  -7 -23    9.29    0.79
  -1  -7  23    9.13    0.71
  -1   7 -23    8.65    0.76
   1  -7 -23    9.46    0.73
   1  -7 -24    6.02    0.61
  -1   7 -24    5.75    0.59
  -1  -7  24    6.01    0.55
   1  -7 -24    5.63    0.55
  -1  -7  25   11.22    0.66
   1  -7 -25   11.53    0.74
  -1   7 -25   10.18    0.68
   1  -7 -25   11.58    0.67
  -1  -7  26    8.12    0.50
   1  -7 -26    7.58    0.49
   1  -7 -26    8.80    0.58
   1  -7 -27   32.53    1.05
   1  -8  18    8.53    0.44
   1  -8  17    3.08    0.32
   1  -8  17    2.42    0.29
   1   8 -17    2.62    0.33
  -1  -8 -17    3.12    0.33
   1  -8  16   15.75    0.73
  -1  -8 -16   17.62    0.78
   1   8 -16   16.50    0.84
   1  -8  15   32.22    1.17
   1   8 -15   33.10    1.31
   1  -8  14   11.65    0.71
  -1  -8 -14   11.55    0.73
   1   8 -14   11.24    0.78
   1  -8  14   10.26    0.66
  -1  -8 -13   66.66    1.94
   1  -8  13   67.57    1.90
  -1  -8 -12   18.12    0.98
   1  -8  12   16.66    0.88
   1   8 -12   16.35    1.02
   1  -8  12   18.52    0.95
   1  -8  11    1.08    0.36
  -1  -8 -11    0.87    0.38
   1  -8  11    0.64    0.36
   1   8 -11    1.05    0.41
   1  -8  10    3.08    0.47
   1  -8  10    4.21    0.55
  -1  -8 -10    3.63    0.56
   1   8 -10    3.32    0.58
   1  -8   9   79.83    2.28
   1   8  -9   68.46    2.42
  -1  -8  -9   76.73    2.35
   1  -8   9   67.66    2.12
   1  -8   8    5.65    0.61
   1   8  -8    6.07    0.75
  -1  -8  -8    7.06    0.74
   1  -8   8    6.69    0.67
  -1  -8  -7   34.75    1.54
   1   8  -7   31.81    1.61
   1  -8   7   36.66    1.49
   1  -8   7   30.34    1.36
   1  -8   6    4.62    0.62
  -1  -8  -6    4.64    0.67
   1  -8   6    4.55    0.61
   1   8  -6    3.68    0.65
   1   8  -5   14.56    1.13
   1  -8   5   14.22    0.97
  -1  -8  -5   16.23    1.08
   1  -8   5   17.32    1.05
   1  -8   4    3.27    0.55
  -1  -8  -4    4.58    0.66
   1  -8   4    4.48    0.61
   1   8  -4    3.81    0.68
  -1   8   3   19.29    1.33
   1   8  -3   18.05    1.26
   1  -8   3   21.16    1.17
   1  -8   3   17.82    1.10
  -1  -8  -3   19.15    1.17
   1  -8   2    1.16    0.47
  -1  -8  -2    1.08    0.48
   1  -8   2    1.37    0.49
  -1   8   2    0.95    0.51
   1   8  -2    0.88    0.49
   1  -8   1    8.29    0.81
  -1   8   1    9.23    0.96
   1   8  -1    8.87    0.91
  -1  -8  -1    9.83    0.87
   1  -8   1   10.04    0.85
   1  -8   0    0.43    0.43
  -1  -8   0    0.77    0.45
   1  -8   0    0.61    0.42
   1   8   0    0.59    0.47
  -1   8   0    0.27    0.47
   1  -8  -1    8.92    0.85
   1   8   1    9.08    0.93
   1  -8  -1   10.07    0.86
  -1  -8   1    9.63    0.86
  -1   8  -1    8.48    0.90
   1  -8  -2    1.18    0.50
   1  -8  -2    0.99    0.46
  -1  -8   2    1.06    0.48
   1   8   2    1.20    0.51
  -1   8  -2    1.15    0.51
   1   8   3   16.68    1.22
  -1   8  -3   18.66    1.29
   1  -8  -3   17.17    1.12
   1  -8  -3   20.82    1.19
  -1  -8   3   19.76    1.16
   1  -8  -4    4.50    0.64
  -1  -8   4    4.19    0.64
  -1   8  -4    4.10    0.71
  -1  -8   5   15.99    1.03
  -1   8  -5   15.49    1.16
   1  -8  -5   16.78    1.07
  -1  -8   6    4.54    0.63
  -1   8  -6    4.01    0.67
   1  -8  -6    5.00    0.66
   1  -8  -7   37.87    1.57
  -1   8  -7   33.49    1.66
  -1  -8   7   35.47    1.51
  -1   8  -8    5.81    0.73
   1  -8  -8    6.80    0.71
  -1  -8   8    5.85    0.66
  -1  -8   9   77.31    2.31
   1  -8  -9   80.93    2.38
   1  -8 -10    3.27    0.53
  -1  -8  10    3.46    0.52
  -1   8 -10    3.44    0.57
   1  -8 -11    1.10    0.41
  -1  -8  11    1.37    0.40
  -1   8 -11    0.84    0.40
  -1  -8  12   19.58    0.99
  -1   8 -12   17.30    1.07
   1  -8 -12   18.95    0.99
   1  -8 -13   66.21    1.93
  -1   8 -13   60.36    2.05
  -1  -8  13   65.61    1.92
  -1  -8  14   11.44    0.71
   1  -8 -14   10.99    0.70
  -1   8 -14   10.93    0.77
   1  -8 -15   37.26    1.38
  -1  -8  15   38.62    1.28
  -1   8 -15   35.89    1.40
   1  -8 -15   38.22    1.27
  -1  -8  16   18.28    0.79
   1  -8 -16   20.16    0.92
   1  -8 -16   18.10    0.78
  -1  -8  17    3.04    0.32
  -1   8 -17    2.81    0.34
   1  -8 -17    3.49    0.33
   1  -8 -17    3.01    0.38
   1  -8 -18   10.81    0.58
   1  -8 -19    2.34    0.27
   2   0   0  991.41   17.74
   2   0   0 1001.84   17.80
   2   0   0 1023.87   17.60
   2   0  -1   99.78    2.43
   2   0   1   95.34    2.45
   2   0  -1   85.18    2.46
   2   0   1   92.25    2.25
   2   0  -1   88.73    2.37
   2   0  -2   30.53    1.23
   2   0  -2   28.94    1.18
   2   0   2   27.31    1.14
   2   0  -2   31.80    1.31
   2   0   2   26.01    0.97
   2   0  -3  787.65   14.07
   2   0  -3  772.79   13.89
   2   0  -3  777.43   14.18
   2   0   3  783.38   13.84
   2   0   3  763.83   13.53
   2   0  -4  136.11    3.34
   2   0  -4  136.26    3.46
   2   0   4  138.45    3.11
   2   0   4  135.54    2.81
   2   0  -5   27.42    1.14
   2   0   5   25.44    1.02
   2   0  -5   25.71    1.31
   2   0  -6   30.46    1.37
   2   0  -6   29.81    1.45
   2   0   6   28.69    1.08
  -2   0   7   32.26    0.79
   2   0   7   29.19    0.78
   2   0   7   32.64    0.78
  -2   0   7   30.91    0.76
   2   0  -7   33.27    1.56
   2   0   7   32.23    1.14
   2   0  -7   31.78    1.46
   2   0   8  137.57    1.42
  -2   0   8  136.09    1.42
   2   0   8  141.36    2.07
  -2   0   8  141.94    1.56
   2   0  -8  139.20    3.02
  -2   0   9   24.18    0.82
   2   0  -9   26.27    1.49
  -2   0   9   25.63    0.88
   2   0   9   28.05    0.89
   2   0   9   25.15    1.00
  -2   0 -10  619.27   11.66
  -2   0  10  674.29   11.59
   2   0  10  625.35   11.49
  -2   0  10  657.40   11.48
   2   0  10  670.14   11.69
   2   0 -10  700.80   12.91
  -2   0  11  285.38    5.30
   2   0  11  259.21    5.18
  -2   0 -11  247.57    5.29
   2   0  11  272.47    5.25
   2   0 -11  257.34    5.20
   2   0 -11  271.36    6.37
  -2   0  12  493.04    8.82
  -2   0 -12  443.73    8.83
   2   0 -12  480.81    8.75
   2   0 -12  492.09   10.05
   2   0  12  453.03    8.69
  -2   0 -13  325.43    6.75
   2   0 -13  331.15    6.61
   2   0 -13  351.22    7.83
  -2   0  13  350.07    6.73
  -2   0 -14  135.46    3.43
   2   0 -14  141.44    3.35
   2   0 -14  144.00    4.30
   2   0 -15    0.37    0.27
  -2   0 -15    0.13    0.24
   2   0 -15   -0.18    0.46
   2   0 -15    0.41    0.60
  -2   0 -16    0.07    0.26
   2   0 -16    0.37    0.28
   2   0 -16    0.67    0.60
   2   0 -16    0.04    0.65
   2   0 -17    6.03    0.92
  -2   0 -17    5.81    0.67
   2   0 -17    6.52    0.65
   2   0 -18   41.35    2.24
   2   0 -18   41.46    2.22
   2   0 -18   42.27    2.24
  -2   0 -18   38.16    1.73
   2   0 -18   42.32    1.72
   2   0 -19   11.93    1.30
   2   0 -19   11.13    1.25
  -2   0 -19   13.44    1.04
   2   0 -19   12.01    0.93
   2   0 -19   11.25    1.33
   2   0 -20  141.70    4.66
   2   0 -20  141.47    4.64
   2   0  20  152.81    4.30
   2   0 -20  150.23    4.79
  -2   0 -20  134.57    3.95
   2   0 -20  146.07    3.94
   2   0  21   53.59    2.38
   2   0 -21   50.80    2.68
   2   0 -21   50.54    2.66
   2   0 -21   54.55    2.76
  -2   0 -21   52.54    2.24
   2   0 -21   60.28    2.28
   2   0  22  291.90    7.07
   2   0 -22  284.45    7.60
   2   0 -22  297.31    7.09
   2   0 -22  304.95    7.81
  -2   0 -22  280.71    6.83
   2   0 -22  301.57    6.79
   2   0 -22  278.49    7.49
   2   0 -23  146.03    4.96
   2   0 -23  148.43    4.50
   2   0 -23  155.77    5.15
  -2   0 -23  139.35    4.29
   2   0  23  149.81    4.43
   2   0 -23  139.19    4.82
   2   0 -23  150.48    4.24
   2   0 -24  359.57    9.16
  -2   0 -24  356.78    8.36
   2   0 -24  376.80    8.30
   2   0 -24  369.95    8.61
   2   0 -24  389.09    9.44
   2   0  24  378.28    8.52
   2   0 -24  353.97    9.05
   2   0  25  140.48    4.34
   2   0 -25  136.88    4.12
   2   0 -25  129.64    4.78
   2   0 -25  141.51    4.43
   2   0 -25  136.02    4.91
  -2   0 -25  128.84    4.18
   2   0 -25  129.93    4.69
   2   0 -26  145.52    5.14
   2   0 -26  155.73    4.81
   2   0 -26  165.74    5.47
  -2   0 -26  149.71    4.61
   2   0 -26  149.00    5.10
   2   0  26  151.39    4.66
   2   0  27  482.49   10.59
   2   0 -27  446.53   11.25
  -2   0 -27  465.44   10.47
   2   0 -27  497.99   10.81
   2   0 -27  502.77   11.69
   2   0 -27  494.91   11.31
  -2   0 -28  105.01    3.68
  -2   0  28   99.19    3.71
   2   0  28  105.60    3.56
   2   0 -28  110.68    3.89
   2   0 -28   99.32    4.22
   2   0  28  105.18    3.76
   2   0 -28  107.52    4.16
   2   0  29  280.10    7.01
   2   0  29  276.73    6.80
  -2   0  29  275.37    7.08
  -2   0 -29  270.36    6.94
   2   0 -29  272.18    6.80
   2   0 -29  290.65    7.29
   2   0 -29  269.57    7.50
   2   0  30   74.51    3.05
   2   0  30   70.29    2.87
  -2   0  30   71.49    3.06
  -2   0 -30   73.20    3.01
   2   0 -30   75.03    2.93
   2   0 -30   78.93    3.23
   2   0 -30   73.13    3.39
   2   0  31    4.91    0.89
  -2   0  31    3.96    0.72
   2   0 -31    5.18    1.05
   2   0  31    4.61    0.79
  -2   0  31    3.69    0.84
   2   0 -31    5.57    0.87
  -2   0 -31    3.82    0.75
   2   0 -31    5.42    0.83
   2   0 -32   -0.10    0.70
   2   0  32    0.69    0.65
   2   0  32    0.97    0.55
  -2   0  32    1.20    0.62
   2   0 -32    0.43    0.49
  -2   0 -32    0.77    0.49
   2   0 -32    0.47    0.46
   2   0  33  121.98    3.83
  -2   0  33  120.33    4.00
   2   0  33  120.29    4.22
  -2   0 -33  124.89    3.98
   2   0 -33  135.01    3.99
   2   0 -33  136.83    4.27
   2   0 -33  131.66    4.42
   2   0  34    1.97    0.73
   2   0  34    0.82    0.51
  -2   0  34    0.18    0.47
   2   0 -34    0.39    0.47
  -2   0 -34    0.35    0.46
   2   0 -34    0.55    0.47
   2   0 -34    0.17    0.60
   2   0  35    1.96    0.71
   2   0  35    1.21    0.51
  -2   0  35    1.49    0.57
   2   0 -35    1.76    0.59
  -2   0 -35    0.99    0.47
   2   0 -35    1.26    0.47
   2   0 -35    1.76    0.69
   2   0 -36   34.89    1.88
   2   0  36   31.79    1.61
  -2   0  36   30.90    1.68
   2   0  36   31.62    1.83
  -2   0 -36   33.60    1.67
   2   0 -36   33.77    1.63
   2   0 -36   36.85    1.88
   2   0  37    9.21    0.86
  -2   0  37    8.34    0.85
   2   0  37    8.76    0.98
  -2   0 -37    9.37    0.84
   2   0 -37   10.02    0.85
   2   0 -37   10.55    1.00
   2   0 -37    9.06    0.93
   2   0  38  174.08    4.13
   2   0  38  171.76    4.51
  -2   0 -38  161.30    4.06
   2   0 -38  182.14    4.54
   2   0 -38  162.87    4.23
   2   0  39    2.51    0.55
   2   0 -39    1.61    0.48
   2   0 -39    1.46    0.43
   2   0  40   49.81    1.84
   2   0 -40   52.10    1.83
   2   0  41    9.99    0.72
   2   0 -41   10.77    0.69
   2   0  42    0.18    0.21
   2  -1  42    7.08    0.54
   2  -1  41    0.59    0.32
   2  -1  40   18.41    1.09
   2   1 -40   15.90    0.87
   2  -1  39   40.67    1.79
   2   1 -39   38.66    1.57
   2  -1  38    3.02    0.66
   2   1 -38    3.01    0.53
  -2  -1 -38    2.30    0.43
   2  -1  37    4.45    0.79
   2   1 -37    4.79    0.62
   2  -1  37    3.85    0.60
  -2   1  37    3.87    0.66
   2   1 -37    4.97    0.67
  -2  -1 -37    3.88    0.58
   2  -1  36   30.66    1.81
   2  -1  36   26.46    1.43
  -2   1  36   25.29    1.51
   2   1 -36   27.80    1.45
  -2  -1 -36   26.86    1.47
   2   1 -36   29.37    1.61
   2  -1  35   56.57    2.24
   2  -1  35   53.90    2.34
  -2   1  35   53.64    2.39
   2   1 -35   57.86    2.26
  -2  -1 -35   55.04    2.29
   2   1 -35   59.46    2.45
   2   1 -35   54.11    2.28
   2  -1  34   24.10    1.47
  -2   1  34   21.71    1.56
   2   1 -34   28.78    2.04
   2  -1  34   22.78    1.55
   2   1 -34   25.21    1.50
  -2  -1 -34   24.49    1.54
   2   1 -34   22.91    1.55
   2   1 -34   23.66    1.55
   2  -1  33   32.42    1.87
   2   1 -33   32.86    1.94
   2  -1  33   31.77    1.74
  -2   1  33   30.92    1.92
   2   1 -33   34.47    2.29
  -2  -1 -33   32.79    1.86
   2   1 -33   35.59    1.97
   2   1 -33   33.24    1.78
   2  -1  32   26.09    1.73
   2  -1  32   30.15    1.71
  -2   1  32   29.62    1.92
   2   1 -32   29.89    2.18
   2   1 -32   30.39    1.93
   2   1 -32   28.56    1.69
  -2  -1 -32   28.98    1.79
   2   1 -32   30.60    1.84
   2  -1  31   84.84    3.21
   2  -1  31   82.28    3.01
  -2   1  31   83.53    3.40
   2   1 -31   84.75    3.75
   2   1 -31   85.75    3.13
  -2  -1 -31   81.06    3.21
   2   1 -31   90.24    3.37
   2   1 -31   88.73    3.88
   2   1 -31   86.26    3.47
   2  -1  30  212.29    5.74
   2  -1  30  209.71    5.52
  -2   1  30  209.33    6.02
   2   1 -30  210.90    5.63
   2   1 -30  210.58    6.49
  -2  -1 -30  205.07    5.79
   2   1 -30  218.68    5.93
   2   1 -30  226.80    6.78
   2   1 -30  214.65    6.15
   2  -1  29   54.12    2.52
  -2   1  29   54.49    2.74
   2   1 -29   61.91    3.17
  -2  -1 -29   58.13    2.64
   2   1 -29   54.27    2.58
   2   1 -29   53.32    3.02
   2   1 -29   55.10    2.82
   2  -1  29   53.76    2.38
   2   1 -29   53.67    2.44
   2  -1  28  158.90    4.74
   2  -1  28  158.91    4.55
   2   1 -28  169.03    5.57
   2   1 -28  156.85    4.64
  -2  -1 -28  154.26    4.80
   2   1 -28  160.73    4.87
   2   1 -28  167.75    5.66
   2   1 -28  166.90    5.28
  -2   1  28  154.96    5.04
   2  -1  27   85.60    3.06
   2   1 -27   88.01    3.85
  -2  -1 -27   84.03    3.28
   2   1 -27   91.07    3.40
   2   1 -27   93.36    3.73
   2  -1  27   83.17    3.20
   2  -1  26  434.46    9.65
   2   1 -26  433.52   10.65
   2   1 -26  464.34    9.94
  -2  -1 -26  418.87    9.75
   2   1 -26  436.48   10.32
   2  -1  25  370.39    8.64
   2   1 -25  377.03    9.55
   2   1 -25  401.25    8.87
   2   1 -25  393.13    9.36
  -2  -1 -25  362.30    8.67
   2   1 -24  502.23   11.27
   2  -1  24  491.28   10.52
   2   1 -24  499.98   11.49
   2   1 -24  493.58   10.66
   2   1 -24  503.36   10.37
  -2  -1 -24  467.29   10.55
   2  -1  23  251.99    6.41
   2   1 -23  264.25    7.22
   2   1 -23  267.85    6.27
   2   1 -23  256.93    6.98
  -2  -1 -23  253.75    6.45
   2   1 -23  251.64    7.13
   2  -1  22   40.98    1.99
   2   1 -22   37.61    2.32
   2   1 -22   38.42    1.83
   2   1 -22   35.25    2.37
   2   1 -22   38.79    2.40
   2   1 -22   37.18    2.30
  -2  -1 -22   35.16    1.89
   2  -1  21   66.09    2.63
   2   1 -21   66.98    3.13
   2   1 -21   69.93    2.52
   2   1 -21   70.20    3.28
   2   1 -21   68.25    3.13
  -2  -1 -21   61.44    2.55
   2   1 -21   66.97    3.05
   2   1 -20   40.11    2.33
   2   1 -20   37.77    2.23
   2   1 -20   40.98    1.82
   2   1 -20   35.70    2.24
   2  -1  20   41.48    1.98
  -2  -1 -20   38.78    1.91
   2   1 -19    6.53    1.13
   2  -1  19    6.07    0.79
  -2  -1 -19    4.81    0.68
   2   1 -19    5.81    1.03
   2   1 -19    5.85    0.69
   2   1 -19    5.41    0.99
  -2  -1 -18  383.45    8.54
   2   1 -18  402.29    9.35
   2   1 -18  412.71    9.39
   2   1 -18  420.07    8.39
   2   1 -18  412.57    9.56
   2   1 -17   79.71    3.31
   2   1 -17   82.50    3.23
   2   1 -17   84.57    2.57
  -2  -1 -17   77.15    2.68
   2   1 -16  135.63    4.48
  -2  -1 -16  132.72    3.74
  -2  -1 -15  564.32   11.25
   2   1 -15  595.91   11.04
   2   1 -14   91.87    3.39
   2   1 -14   94.71    2.61
   2   1 -13 2257.75   39.68
   2   1 -13 2228.74   38.23
   2   1 -12  736.80   14.44
   2   1 -12  716.09   13.09
  -2   1  12  729.43   13.36
   2   1 -11  164.87    4.49
  -2   1  11  160.65    3.68
   2   1 -11  159.32    3.50
   2   1 -10  275.74    6.42
   2  -1  10  259.27    5.28
   2   1 -10  270.75    6.35
   2   1 -10  270.16    5.32
  -2   1  10  279.97    5.50
  -2   1   9  666.58   11.67
   2   1  -9  666.56   12.75
   2   1  -9  667.74   12.72
   2   1  -8 1852.34   31.42
  -2   1   8 1824.08   30.24
   2  -1   8 1720.91   30.11
  -2   1   8 1777.44   30.11
   2   1  -8 1765.39   31.34
  -2   1   7   64.01    1.58
   2   1  -7   67.02    2.33
  -2   1   7   62.21    1.50
   2   1  -7   63.04    2.26
   2   1  -6   41.53    1.52
  -2   1   6   40.84    0.88
  -2   1   6   39.46    0.79
   2   1  -6   39.61    1.59
   2   1  -6   40.84    1.57
  -2   1   5  213.61    3.93
   2   1  -5  230.93    4.96
  -2   1   5  216.20    3.98
   2   1  -5  223.39    5.09
   2  -1   5  215.51    3.94
   2   1  -5  226.84    5.05
  -2   1   4  913.92   15.01
   2   1  -4  958.85   16.24
   2  -1   4  850.78   14.95
  -2   1   4  893.24   14.97
   2   1  -4  961.79   16.44
   2  -1   4  868.76   15.46
   2   1  -4  950.95   16.31
   2   1  -3 1787.61   30.63
   2   1  -3 1818.02   30.79
   2  -1   3 1725.23   30.04
   2   1  -2  188.27    4.33
   2  -1   2  181.36    3.94
   2  -1   1  156.24    3.32
   2   1  -1  157.81    3.77
   2   1  -1  161.76    3.84
   2  -1   1  157.61    3.52
   2   1   0    1.58    0.42
   2  -1   0    0.86    0.24
   2   1   0    1.12    0.41
   2  -1   0    1.05    0.20
   2  -1  -1  156.22    3.33
   2  -1  -1  157.40    3.68
   2   1   1  160.11    3.83
   2  -1  -2  197.98    3.80
   2  -1  -2  191.06    4.22
   2   1   2  185.34    4.24
   2  -1  -3 1663.61   29.30
   2   1   3 1763.64   29.67
   2  -1  -3 1728.01   29.67
  -2  -1   4  877.86   14.95
   2   1   4  909.50   15.01
   2  -1  -4  899.80   15.87
   2   1   4  881.27   15.00
   2   1   4  932.80   16.11
   2  -1  -4  905.89   16.19
   2   1   5  224.36    4.03
   2   1   5  219.29    4.04
  -2  -1   5  223.55    4.00
   2  -1  -5  221.29    4.77
   2   1   5  221.39    4.85
   2  -1  -5  216.29    4.97
   2   1   6   43.42    0.84
   2  -1  -6   39.37    1.40
  -2  -1   6   39.50    0.78
   2   1   6   42.91    1.43
   2  -1  -6   38.46    1.48
   2   1   7   61.74    1.54
   2  -1  -7   65.36    2.10
   2   1   7   63.40    1.52
   2   1   7   62.57    1.99
  -2  -1   7   62.50    1.51
   2  -1  -7   60.12    2.18
   2   1   8 1718.63   29.51
   2  -1  -8 1741.12   30.40
   2   1   8 1736.80   29.48
   2   1   8 1688.16   30.07
   2  -1  -8 1757.60   30.58
  -2  -1   8 1787.31   29.50
  -2   1  -9  642.16   11.76
   2  -1  -9  662.62   12.53
   2   1   9  656.50   12.19
   2  -1  -9  634.93   12.64
   2   1   9  650.29   11.72
   2  -1 -10  276.31    6.16
   2   1  10  271.87    5.77
   2  -1 -10  277.30    6.28
   2   1  10  263.09    5.42
  -2   1 -10  260.66    5.44
  -2   1 -11  150.47    3.51
   2  -1 -11  154.67    4.12
   2   1  11  153.50    3.72
   2   1  11  148.51    3.47
   2  -1 -11  151.84    4.19
  -2   1 -12  671.50   12.88
  -2  -1  12  724.30   12.92
   2  -1 -12  734.79   13.75
   2   1  12  734.88   13.16
   2  -1 -12  686.41   13.77
  -2   1 -13 2144.61   37.43
   2  -1 -13 2247.02   38.39
   2   1  13 2185.78   37.60
  -2   1 -14   94.96    2.67
   2  -1 -14   91.73    3.14
   2   1  14   92.25    2.68
  -2   1 -15  585.00   11.33
   2  -1 -15  608.88   12.19
   2   1  15  596.01   11.33
   2  -1 -16  145.32    3.68
  -2   1 -16  135.23    3.67
   2  -1 -16  145.19    4.32
   2   1  16  146.44    3.70
   2  -1 -17   82.94    2.61
   2  -1 -17   79.83    3.20
   2   1  17   83.24    2.99
  -2   1 -17   80.17    2.63
   2  -1 -17   83.94    3.16
   2   1  17   83.17    2.58
   2  -1 -18  407.01    9.27
   2   1  18  409.95    9.10
  -2   1 -18  411.89    8.58
   2  -1 -18  432.10    9.42
   2   1  18  396.93    8.32
   2  -1 -18  413.55    8.50
   2   1  19    6.63    0.85
   2  -1 -19    6.32    1.04
   2   1  19    6.34    0.89
   2  -1 -19    6.89    0.85
  -2   1 -19    6.62    0.76
   2  -1 -19    7.71    1.06
   2  -1 -19    7.27    0.78
   2   1  20   40.95    2.04
   2  -1 -20   38.42    2.23
   2   1  20   40.71    2.16
   2  -1 -20   43.39    2.12
  -2   1 -20   39.11    1.86
   2  -1 -20   42.90    2.33
   2  -1 -20   40.51    1.85
   2   1  21   69.24    2.82
   2  -1 -21   68.51    3.07
   2   1  21   73.10    3.02
   2  -1 -21   68.59    2.83
  -2   1 -21   69.65    2.65
   2  -1 -21   78.59    3.30
   2  -1 -21   70.78    2.62
   2  -1 -21   81.93    3.40
   2   1  22   38.69    2.10
   2  -1 -22   36.24    2.24
   2   1  22   37.81    2.20
   2  -1 -22   41.51    2.17
  -2   1 -22   39.00    1.93
   2  -1 -22   40.71    2.39
   2  -1 -22   37.39    2.36
   2  -1 -22   37.40    1.87
   2   1  23  278.03    6.87
   2  -1 -23  270.87    6.50
   2  -1 -23  264.71    7.21
   2   1  23  264.49    7.07
   2  -1 -23  273.68    6.92
  -2   1 -23  263.73    6.53
   2  -1 -23  258.01    7.26
   2  -1 -24  481.92   11.37
   2  -1 -24  492.38   11.34
   2   1  24  494.17   11.26
   2  -1 -24  505.00   10.98
  -2   1 -24  482.24   10.48
   2  -1 -24  500.43   10.49
   2   1  25  393.61    9.42
   2  -1 -25  389.89    9.54
   2  -1 -25  391.16    9.16
  -2   1 -25  375.59    8.70
   2  -1 -25  378.54    9.52
   2  -1 -26  429.94   10.45
   2   1  26  446.40   10.35
   2  -1 -26  457.42   10.15
   2  -1 -26  435.74   10.52
   2   1  27   89.25    3.32
   2  -1 -27   86.37    3.75
  -2   1 -27   87.19    3.29
   2   1  27   93.29    3.76
   2  -1 -27   92.17    3.60
   2  -1 -27   89.34    3.87
  -2  -1  28  150.99    4.65
   2   1  28  161.06    4.75
   2  -1 -28  157.28    5.33
  -2   1 -28  151.68    4.67
   2   1  28  158.26    5.21
   2  -1 -28  161.56    4.69
  -2   1 -28  143.80    4.48
   2  -1 -28  167.20    5.09
   2  -1 -28  161.09    5.36
  -2  -1  29   51.81    2.45
   2   1  29   57.48    2.59
   2  -1 -29   53.09    2.91
  -2   1 -29   53.70    2.50
   2   1  29   55.74    2.84
   2  -1 -29   57.19    2.50
  -2   1 -29   48.06    2.30
   2  -1 -29   53.76    2.70
   2  -1 -29   51.31    2.87
  -2  -1  30  213.66    5.71
   2   1  30  211.28    5.74
   2  -1 -30  224.75    6.50
  -2   1 -30  208.25    5.71
   2   1  30  209.17    6.17
   2  -1 -30  214.92    5.67
  -2   1 -30  191.58    5.44
   2  -1 -30  213.92    6.05
   2  -1 -30  212.69    6.33
  -2  -1  31   81.60    3.12
   2   1  31   80.67    3.14
   2  -1 -31   83.55    3.63
  -2   1 -31   81.63    3.11
   2   1  31   79.20    3.39
   2  -1 -31   85.61    3.11
  -2   1 -31   79.90    2.99
   2  -1 -31   84.14    3.38
   2  -1 -31   81.29    3.59
  -2  -1  32   30.91    1.80
   2   1  32   30.65    1.81
  -2   1 -32   28.75    1.75
   2   1  32   27.45    1.91
   2  -1 -32   32.44    1.80
  -2   1 -32   28.53    1.68
   2  -1 -32   29.40    1.93
   2  -1 -32   32.52    2.18
  -2   1 -33   33.25    1.83
  -2  -1  33   32.06    1.81
   2   1  33   32.32    1.81
   2   1  33   31.56    1.98
   2  -1 -33   32.05    1.75
  -2   1 -33   29.65    1.68
   2  -1 -33   31.10    1.93
   2  -1 -33   34.71    2.18
  -2  -1  34   22.81    1.49
   2   1  34   23.56    1.49
   2   1  34   23.78    1.67
  -2   1 -34   22.40    1.45
   2  -1 -34   25.03    1.50
  -2   1 -34   22.09    1.40
   2  -1 -34   26.26    1.73
   2  -1 -34   25.29    1.82
  -2  -1  35   53.36    2.22
   2   1  35   55.31    2.26
   2   1  35   54.94    2.44
  -2   1 -35   56.61    2.28
   2  -1 -35   58.59    2.26
  -2   1 -35   47.30    2.04
   2  -1 -35   58.34    2.54
   2  -1 -35   57.95    2.64
  -2  -1  36   26.64    1.46
   2   1  36   25.41    1.44
   2   1  36   24.73    1.55
  -2   1 -36   25.82    1.43
   2  -1 -36   28.65    1.46
   2  -1 -36   31.36    1.75
   2  -1 -36   29.06    1.79
   2  -1 -37    4.79    0.80
   2   1  37    4.85    0.71
  -2   1 -37    4.81    0.62
   2  -1 -37    5.05    0.61
  -2  -1  37    3.98    0.61
   2   1  37    4.28    0.63
   2  -1 -37    4.56    0.71
   2   1  38    3.34    0.58
   2   1  38    2.92    0.52
   2  -1 -38    3.56    0.64
  -2   1 -38    2.73    0.45
   2  -1 -38    3.68    0.69
   2   1  39   32.92    1.47
   2  -1 -39   36.19    1.62
   2  -1 -40   20.74    1.11
   2  -1 -41    0.88    0.28
   2  -2  42    3.15    0.31
   2  -2  41   21.20    0.98
   2   2 -38    9.79    0.70
   2  -2  37    1.06    0.52
   2   2 -37    1.36    0.39
  -2  -2 -37    1.05    0.35
   2  -2  36   21.03    1.36
   2  -2  36   22.52    1.21
   2   2 -36   21.21    1.18
  -2  -2 -36   19.86    1.19
   2   2 -36   21.13    1.24
   2  -2  35   12.65    1.12
   2  -2  35   10.97    0.94
   2   2 -35   11.22    0.93
  -2  -2 -35   11.30    0.96
   2   2 -35   11.41    0.97
   2  -2  34   59.40    2.46
   2  -2  34   58.95    2.24
   2   2 -34   60.81    2.78
   2   2 -34   57.29    2.26
   2   2 -34   57.78    2.36
  -2  -2 -34   56.83    2.34
   2  -2  33    5.84    0.87
   2  -2  33    6.76    0.82
   2   2 -33    5.29    1.06
   2   2 -33    5.80    0.79
  -2  -2 -33    5.95    0.81
  -2   2  33    4.67    0.88
   2   2 -33    5.51    0.79
   2  -2  32   18.98    1.31
   2   2 -32   18.79    1.68
   2   2 -32   19.30    1.35
  -2   2  32   16.74    1.49
   2   2 -32   19.72    1.40
  -2  -2 -32   18.33    1.40
   2  -2  32   19.45    1.47
   2  -2  31   23.12    1.61
   2  -2  31   23.96    1.50
   2   2 -31   24.84    1.91
   2   2 -31   23.54    1.53
  -2   2  31   22.63    1.74
   2   2 -31   24.86    1.61
  -2  -2 -31   23.18    1.61
   2  -2  30  102.41    3.56
   2  -2  30  103.24    3.38
   2   2 -30  103.90    4.12
   2   2 -30  101.74    3.46
  -2   2  30   99.32    3.85
   2   2 -30  102.77    3.56
  -2  -2 -30   97.62    3.57
   2   2 -30  103.29    4.23
   2  -2  29   60.64    2.67
   2  -2  29   63.14    2.56
   2   2 -29   63.52    3.15
   2   2 -29   63.31    2.64
  -2   2  29   59.74    2.91
   2   2 -29   62.30    2.68
  -2  -2 -29   57.27    2.66
   2   2 -29   64.97    3.31
   2  -2  28  383.26    8.71
   2  -2  28  386.51    8.47
   2   2 -28  390.42    9.62
   2   2 -28  380.52    8.64
  -2   2  28  373.22    9.23
   2   2 -28  382.30    8.74
  -2  -2 -28  364.19    8.78
   2   2 -28  398.19    9.90
   2   2 -28  364.66    8.89
   2  -2  27  287.31    7.03
   2  -2  27  296.72    6.83
   2   2 -27  290.45    7.84
   2   2 -27  285.29    6.96
   2   2 -27  278.46    7.29
  -2   2  27  278.39    7.49
  -2  -2 -27  263.06    7.06
   2   2 -27  288.53    7.08
   2   2 -27  284.19    8.00
   2  -2  26    4.96    0.90
   2   2 -26    9.03    1.30
   2  -2  26    5.82    0.83
  -2   2  26    6.08    1.09
   2   2 -26    5.55    0.86
   2   2 -26    5.91    1.14
  -2  -2 -26    4.75    0.82
   2   2 -26    5.71    1.01
   2  -2  25  192.93    5.34
   2   2 -25  203.91    6.15
  -2  -2 -25  185.69    5.40
   2   2 -25  206.70    6.36
   2   2 -25  193.01    5.70
   2   2 -25  184.26    5.88
   2  -2  24  442.48    9.77
   2   2 -24  450.39   10.72
   2   2 -24  443.76   10.26
   2   2 -24  421.79   10.45
   2  -2  23  201.02    5.37
   2   2 -23  198.90    6.12
   2   2 -23  196.32    5.28
   2   2 -23  202.12    5.86
   2   2 -23  193.51    6.05
   2  -2  22  335.96    7.80
   2   2 -22  343.60    8.69
   2   2 -22  342.77    7.75
   2   2 -22  345.47    8.43
   2   2 -22  334.07    8.66
   2  -2  21   61.42    2.53
   2   2 -21   62.69    2.50
   2   2 -21   65.57    3.12
   2   2 -21   65.74    2.54
   2   2 -21   63.14    2.93
   2   2 -21   60.97    3.06
   2  -2  20   70.35    2.70
   2   2 -20   72.86    2.70
   2   2 -20   73.29    3.26
   2   2 -20   75.77    3.37
   2   2 -20   73.18    2.67
   2   2 -20   71.94    3.12
   2  -2  19   81.89    2.96
   2   2 -19   87.14    3.66
   2   2 -19   86.47    2.97
   2   2 -19   94.74    3.66
   2   2 -19   86.98    2.91
   2   2 -19   91.27    3.53
   2  -2  18   56.99    2.32
   2   2 -18   56.88    2.30
   2   2 -18   59.53    2.83
   2   2 -18   60.35    2.28
   2   2 -18   62.49    2.82
   2   2 -18   61.90    2.97
   2  -2  17   97.63    3.16
   2   2 -17  100.73    3.19
   2   2 -17  107.70    3.84
   2   2 -17  106.80    3.15
   2   2 -17  101.89    3.85
   2   2 -17   99.77    3.68
   2   2 -16  105.12    3.93
   2  -2  16   91.91    3.03
   2   2 -16   95.87    3.57
   2   2 -16   97.93    3.09
   2   2 -16  107.04    3.77
   2   2 -16  102.70    3.03
   2   2 -16  101.73    3.79
   2   2 -15  166.81    5.19
   2   2 -15  166.34    4.19
   2   2 -15  171.27    5.14
   2   2 -14   33.70    2.07
   2   2 -14   33.00    1.49
   2   2 -14   30.00    1.96
   2   2 -13 1791.74   31.82
   2   2 -13 1726.46   30.51
   2   2 -13 1758.84   31.98
   2   2 -12  686.10   13.52
   2   2 -12  652.48   12.36
   2   2 -12  659.27   13.54
   2   2 -11  293.73    7.18
   2   2 -11  303.60    7.13
   2   2 -11  300.18    6.22
   2   2 -10  736.42   13.32
   2   2 -10  700.27   14.20
   2   2 -10  738.09   14.43
   2   2  -9 1054.80   18.70
  -2   2   9 1065.17   18.69
   2   2  -9 1043.41   19.78
   2   2  -8 1302.51   22.40
  -2   2   8 1294.98   22.37
   2   2  -7 1125.30   19.77
   2  -2   7 1084.97   19.66
   2   2  -6  219.56    4.62
   2  -2   6  214.44    4.56
   2   2  -5 1806.16   31.03
   2   2  -5 1833.90   31.95
   2  -2   5 1865.22   30.98
  -2   2   5 1842.46   30.99
   2   2  -4  910.39   16.04
   2   2  -4  894.29   16.88
   2  -2   4  916.23   15.95
  -2   2   4  922.60   16.01
   2   2  -4  929.46   17.08
   2   2  -3  779.17   13.73
   2   2  -3  828.05   14.80
   2  -2   3  782.23   13.63
  -2   2   3  783.67   13.71
   2  -2   2   37.63    1.15
  -2   2   2   39.27    1.22
   2   2  -2   39.48    1.23
  -2  -2  -1  827.34   14.13
   2  -2   1  836.07   14.17
  -2   2   1  802.13   14.24
   2   2  -1  839.28   15.30
  -2  -2   0   31.63    1.00
   2  -2   0   35.29    1.04
   2   2   0   33.53    1.61
  -2   2   0   32.54    1.10
   2  -2  -1  814.54   13.90
  -2  -2   1  822.88   13.96
   2   2   1  809.15   15.03
   2   2   1  762.86   14.03
  -2   2  -1  804.85   14.09
  -2  -2   2   39.68    1.19
   2   2   2   38.00    1.23
  -2   2  -2   41.95    1.30
  -2  -2   3  760.76   13.57
   2   2   3  762.48   13.66
  -2   2  -3  793.75   13.76
  -2   2  -4  939.01   16.24
  -2  -2   4  929.00   16.06
   2   2   4  953.80   17.00
  -2   2  -5 1840.40   31.58
  -2  -2   5 1847.66   31.41
   2   2   5 1834.81   31.47
   2   2   5 1877.69   32.31
  -2   2  -6  230.32    4.81
  -2  -2   6  233.29    4.69
   2   2   6  229.76    4.73
   2   2   6  227.63    5.31
  -2   2  -7 1172.11   20.42
   2   2   7 1157.69   20.31
  -2  -2   7 1163.19   20.27
   2   2   7 1164.10   20.96
  -2   2  -8 1290.52   22.64
   2   2   8 1283.55   22.47
  -2  -2   8 1280.94   22.44
   2   2   8 1319.48   23.17
  -2   2  -9 1059.45   18.89
   2   2   9 1068.46   19.36
  -2   2 -10  740.69   13.48
   2   2  10  719.29   13.86
  -2   2 -11  295.24    6.32
   2   2  11  307.89    6.68
  -2   2 -12  663.17   12.45
   2   2  12  656.87   12.77
  -2   2 -13 1775.07   30.72
   2   2  13 1730.72   31.02
  -2   2 -14   31.60    1.53
   2   2  14   33.23    1.67
   2  -2 -15  159.05    4.79
  -2   2 -15  165.23    4.25
   2   2  15  161.57    4.55
   2   2  15  161.23    4.37
  -2   2 -16  107.13    3.20
   2   2  16   99.67    3.41
   2  -2 -16  100.45    3.42
   2   2  16  102.44    3.26
   2  -2 -16   96.77    3.61
   2  -2 -17  100.83    3.50
  -2   2 -17  102.52    3.20
   2   2  17  103.07    3.54
   2  -2 -17  103.63    3.52
   2   2  17  103.56    3.32
   2  -2 -17  102.70    3.77
   2  -2 -18   56.99    2.57
  -2   2 -18   63.04    2.40
   2   2  18   59.78    2.63
   2  -2 -18   60.03    2.61
   2   2  18   57.57    2.39
   2  -2 -18   60.76    2.86
   2  -2 -19   81.57    3.23
  -2   2 -19   87.94    2.99
   2   2  19   86.82    3.31
   2  -2 -19   86.17    3.28
   2   2  19   89.53    3.07
   2  -2 -19   88.06    3.57
   2  -2 -20   71.59    3.02
  -2   2 -20   76.88    2.79
   2   2  20   76.11    3.10
   2  -2 -20   74.79    3.06
   2   2  20   70.78    2.74
   2  -2 -20   69.86    3.25
   2  -2 -21   66.64    2.95
   2   2  21   66.92    2.94
  -2   2 -21   66.06    2.62
   2  -2 -21   65.89    2.90
   2   2  21   66.35    2.65
   2  -2 -21   63.13    3.13
   2  -2 -22  328.99    8.18
   2   2  22  346.10    8.33
  -2   2 -22  326.33    7.67
   2  -2 -22  333.46    8.20
   2   2  22  327.61    7.66
   2  -2 -22  327.08    8.53
   2  -2 -23  209.39    6.00
   2   2  23  203.93    5.96
  -2   2 -23  201.76    5.46
   2  -2 -23  207.27    5.93
   2  -2 -23  199.96    6.22
   2  -2 -24  438.67   10.38
   2   2  24  459.86   10.55
   2  -2 -24  462.07   10.43
  -2   2 -24  440.86    9.81
  -2   2 -25  185.44    5.28
   2  -2 -25  190.11    5.82
   2   2  25  194.52    5.91
   2  -2 -25  205.29    5.89
  -2  -2  26    6.59    0.94
   2  -2 -26    5.26    1.06
   2   2  26    6.01    1.08
  -2   2 -26    6.23    0.91
   2   2  26    6.73    0.98
   2  -2 -26    5.02    0.94
  -2   2 -26    6.58    0.91
  -2  -2  27  286.70    6.91
  -2   2 -27  275.55    6.98
   2   2  27  289.26    7.19
   2  -2 -27  268.40    7.53
   2   2  27  289.48    7.65
  -2   2 -27  269.14    7.00
   2  -2 -27  281.58    6.98
   2  -2 -27  305.64    7.62
  -2  -2  28  388.69    8.62
  -2   2 -28  370.25    8.63
   2   2  28  390.21    8.95
   2   2  28  389.62    9.34
  -2   2 -28  347.92    8.56
   2  -2 -28  390.97    8.73
   2  -2 -28  401.22    9.36
   2  -2 -28  355.00    9.41
  -2  -2  29   64.03    2.63
  -2   2 -29   61.75    2.66
   2   2  29   62.86    2.79
   2   2  29   62.28    3.00
  -2   2 -29   58.67    2.64
   2  -2 -29   62.57    2.64
   2  -2 -29   65.21    2.99
   2  -2 -29   58.50    3.05
  -2  -2  30  102.82    3.44
  -2   2 -30   98.25    3.46
   2   2  30   96.54    3.57
   2   2  30  103.40    3.86
  -2   2 -30   99.24    3.48
   2  -2 -30  102.19    3.49
   2  -2 -30  106.38    3.90
   2  -2 -30   99.50    3.98
  -2  -2  31   22.56    1.50
  -2   2 -31   23.08    1.54
   2   2  31   24.56    1.67
   2   2  31   22.69    1.71
  -2   2 -31   22.97    1.54
   2  -2 -31   24.04    1.55
   2  -2 -31   26.20    1.83
   2  -2 -31   24.59    1.91
  -2  -2  32   19.47    1.35
  -2   2 -32   18.89    1.37
   2   2  32   18.45    1.41
   2   2  32   16.83    1.45
  -2   2 -32   17.88    1.33
   2  -2 -32   21.00    1.42
   2  -2 -32   21.43    1.63
   2  -2 -32   20.79    1.74
   2  -2 -33    7.65    1.17
  -2  -2  33    6.01    0.80
  -2   2 -33    5.98    0.79
   2   2  33    6.93    0.90
   2   2  33    6.48    0.92
  -2   2 -33    6.53    0.84
   2  -2 -33    5.91    0.77
   2  -2 -33    6.66    0.98
  -2  -2  34   54.74    2.18
  -2   2 -34   53.85    2.21
   2   2  34   53.72    2.37
  -2   2 -34   52.09    2.19
   2  -2 -34   59.06    2.26
   2  -2 -34   57.47    2.72
  -2  -2  35   10.34    0.90
  -2   2 -35   11.77    0.96
   2   2  35   10.75    1.00
  -2   2 -35   11.56    0.95
   2  -2 -35   11.23    0.92
   2  -2 -35   14.42    1.22
   2  -2 -35   10.43    1.15
  -2  -2  36   18.64    1.10
  -2   2 -36   19.55    1.15
  -2   2 -36   18.69    1.13
   2  -2 -36   21.97    1.43
   2  -2 -36   20.75    1.46
   2  -2 -37    0.83    0.54
  -2   2 -37    1.00    0.34
   2  -2 -37    1.98    0.53
  -2   2 -37    0.92    0.35
   2  -2 -38   13.27    0.99
   2  -2 -38   12.05    1.00
   2  -2 -39   19.52    1.10
   2  -2 -40   27.73    1.19
   2  -2 -41   22.70    0.92
   2  -3  40    7.27    0.49
   2  -3  39    3.96    0.47
   2  -3  38    4.46    0.54
   2  -3  37    4.47    0.60
   2  -3  37    4.45    0.62
   2  -3  36    1.61    0.50
   2  -3  35   10.78    0.95
   2  -3  35   10.56    0.77
  -2  -3 -35   10.06    0.78
   2  -3  34    1.05    0.53
   2  -3  34    0.91    0.41
   2   3 -34    1.17    0.40
  -2  -3 -34    0.78    0.38
   2  -3  33   19.17    1.35
   2  -3  33   20.71    1.22
   2   3 -33   18.52    1.18
  -2  -3 -33   18.49    1.23
   2  -3  32   20.22    1.42
   2  -3  32   21.72    1.30
   2   3 -32   20.67    1.53
   2   3 -32   19.94    1.29
  -2  -3 -32   19.84    1.34
   2  -3  31    4.59    0.81
   2   3 -31    4.46    0.90
   2  -3  31    4.15    0.68
   2   3 -31    3.68    0.66
  -2  -3 -31    3.92    0.70
   2  -3  30   93.52    3.03
   2   3 -30   89.88    3.50
   2  -3  30   89.30    3.21
   2   3 -30   88.37    3.10
  -2  -3 -30   81.02    3.12
   2  -3  29  145.16    4.40
   2  -3  29  155.64    4.24
   2   3 -29  143.26    4.73
   2   3 -29  147.49    4.33
  -2  -3 -29  137.41    4.39
   2  -3  28  133.16    4.19
   2  -3  28  137.15    3.99
   2   3 -28  131.92    4.55
   2   3 -28  132.25    4.10
  -2  -3 -28  124.61    4.14
   2   3 -28  123.97    4.74
   2  -3  27   21.41    1.57
   2  -3  27   22.25    1.46
   2   3 -27   22.97    1.80
   2   3 -27   19.23    1.45
  -2  -3 -27   19.05    1.51
   2   3 -27   20.78    1.84
   2  -3  26  210.76    5.70
   2  -3  26  223.62    5.53
   2   3 -26  201.11    6.12
   2   3 -26  205.70    5.61
  -2  -3 -26  190.90    5.65
   2   3 -26  217.36    6.63
   2  -3  25   29.05    1.84
   2  -3  25   32.11    1.75
   2   3 -25   27.94    2.04
  -2  -3 -25   27.40    1.83
   2   3 -25   28.65    1.79
   2   3 -25   29.50    2.26
   2   3 -25   29.05    2.05
   2  -3  24   68.80    2.85
   2  -3  24   73.94    2.75
   2   3 -24   67.28    2.81
   2   3 -24   71.45    3.27
  -2  -3 -24   63.36    2.86
   2   3 -24   66.65    3.21
   2  -3  23   11.03    1.18
   2  -3  23   11.23    1.05
   2   3 -23   11.30    1.38
  -2  -3 -23   11.03    1.17
   2   3 -23   10.30    1.34
   2  -3  22   74.48    2.93
   2   3 -22   68.27    3.23
  -2  -3 -22   67.25    2.92
   2   3 -22   69.51    3.35
   2   3 -21   87.30    3.29
   2   3 -21   91.50    3.72
   2  -3  21   84.60    3.19
   2   3 -21   91.15    3.82
   2   3 -20   63.32    3.29
   2  -3  20   61.11    2.60
   2   3 -20   64.13    2.73
   2   3 -20   61.97    3.11
   2   3 -20   63.12    3.03
   2   3 -20   59.12    2.52
   2   3 -20   59.48    2.81
   2   3 -19   46.02    2.78
   2  -3  19   46.27    2.21
   2   3 -19   44.66    2.24
   2   3 -19   49.61    2.62
   2   3 -19   47.83    2.19
   2   3 -19   47.13    2.48
   2   3 -19   47.83    2.73
   2   3 -18   87.76    3.88
   2  -3  18   86.24    3.06
   2   3 -18   83.54    3.14
   2   3 -18   81.78    3.33
   2   3 -18   86.60    3.55
   2   3 -18   85.30    3.04
   2   3 -18   83.93    3.60
   2   3 -17   50.01    2.91
   2  -3  17   49.87    2.24
   2   3 -17   50.41    2.54
   2   3 -17   51.43    2.36
   2   3 -17   54.76    2.30
   2   3 -17   55.16    2.71
   2   3 -17   51.06    2.75
   2  -3  16  134.71    3.98
   2   3 -16  137.34    4.16
   2   3 -16  138.32    4.03
   2   3 -16  147.19    4.67
   2   3 -16  137.89    4.44
   2   3 -16  138.56    4.71
   2   3 -15    4.67    0.70
   2   3 -15    4.95    0.85
   2  -3  15    7.42    0.87
   2   3 -15    5.14    0.94
   2   3 -15    5.75    1.08
   2  -3  14  421.43    8.65
   2   3 -14  402.89    8.63
   2   3 -14  413.75    8.85
   2   3 -14  399.73    9.14
  -2   3  14  400.64    8.75
   2   3 -14  416.86    9.53
  -2   3  13    3.27    0.60
   2   3 -13    2.49    0.55
   2  -3  13    3.40    0.67
   2  -3  13    3.49    0.64
   2   3 -13    3.43    0.73
   2   3 -13    3.29    0.83
   2   3 -13    3.46    0.92
   2   3 -12 1106.87   21.15
   2  -3  12 1125.68   20.27
   2   3 -12 1130.33   20.32
   2   3 -12 1112.48   20.52
   2  -3  12 1057.24   20.25
   2   3 -12 1101.80   20.79
  -2   3  12 1115.73   20.38
   2  -3  11  200.58    5.08
   2   3 -11  210.36    5.10
   2   3 -11  213.19    5.51
   2  -3  11  212.83    5.12
   2   3 -11  213.87    5.32
  -2   3  11  208.02    5.10
   2   3 -11  209.66    5.71
   2   3 -11  200.71    5.83
   2   3 -10  191.58    5.38
   2   3 -10  180.32    4.54
   2  -3  10  182.80    4.57
   2   3 -10  186.74    4.80
  -2   3  10  169.52    4.49
   2   3 -10  181.65    5.12
   2   3  -9   74.64    2.68
  -2   3   9   72.37    2.47
   2   3  -9   69.81    2.88
   2   3  -9   74.74    2.48
   2   3  -8  363.71    7.66
   2   3  -8  367.49    7.97
   2   3  -8  377.79    8.48
  -2   3   8  360.89    7.61
   2   3  -7  493.58    9.82
  -2   3   7  488.90    9.76
  -2   3   6  185.35    4.42
   2   3  -6  192.98    5.15
   2   3  -6  184.94    4.44
   2   3  -5  116.62    3.65
  -2   3   5  109.08    3.00
   2   3  -5  109.89    3.57
   2   3  -5  108.94    3.04
  -2   3   4  836.82   15.21
   2   3  -4  838.43   15.25
   2   3  -3  225.58    5.57
  -2   3   3  215.55    4.84
   2   3  -3  214.85    4.88
   2   3  -2  287.85    6.59
   2   3  -2  280.33    5.93
  -2   3   2  274.32    5.88
   2   3  -1  883.76   16.48
  -2   3   1  865.80   15.68
   2   3  -1  853.33   15.67
   2   3   0    2.54    0.76
   2   3   0    6.76    0.66
   2   3   1  857.16   16.19
   2   3   1  856.55   15.47
  -2   3  -1  854.37   15.46
   2   3   1  833.56   16.31
   2   3   2  263.40    6.35
   2   3   2  272.95    5.81
  -2   3  -2  271.67    5.82
   2   3   3  210.18    5.36
   2   3   3  217.31    4.83
   2   3   3  220.27    5.52
  -2   3  -3  211.55    4.82
   2   3   4  827.53   16.12
   2   3   4  854.32   15.47
   2   3   4  858.45   16.22
  -2   3  -4  846.86   15.49
   2   3   5  107.44    2.98
   2   3   5  106.22    3.43
  -2   3  -5  112.52    3.05
   2   3   6  185.19    4.40
   2   3   6  182.76    4.91
  -2   3  -6  190.00    4.48
  -2   3  -7  489.95    9.73
   2   3   7  488.02    9.64
   2   3   7  496.11   10.21
  -2   3  -8  361.86    7.65
   2   3   8  376.00    7.63
   2   3   8  357.95    8.07
  -2   3  -9   73.06    2.46
   2   3   9   71.86    2.40
   2   3   9   69.12    2.68
  -2   3 -10  181.13    4.57
   2   3  10  181.10    4.52
   2   3  10  185.64    4.95
  -2   3 -11  211.36    5.20
   2  -3 -11  226.79    5.79
   2   3  11  211.24    5.12
   2   3  11  215.82    5.56
  -2   3 -12 1089.53   20.18
   2  -3 -12 1049.45   20.73
   2  -3 -12 1151.75   20.91
   2   3  12 1116.10   20.10
   2   3  12 1079.33   20.56
   2   3  13    3.07    0.58
  -2   3 -13    3.16    0.62
   2  -3 -13    3.42    0.73
   2   3  13    4.26    0.80
   2  -3 -13    2.58    0.81
  -2   3 -14  391.33    8.47
   2  -3 -14  411.37    9.14
   2   3  14  390.23    8.39
   2   3  14  389.07    8.82
   2  -3 -14  377.60    9.00
  -2   3 -15    4.32    0.69
   2   3  15    5.40    0.88
   2  -3 -15    2.82    0.82
  -2   3 -16  135.87    3.99
   2  -3 -16  127.51    4.40
   2  -3 -16  140.24    4.49
   2   3  16  135.45    4.27
  -2   3 -17   52.24    2.27
   2  -3 -17   54.56    2.62
   2   3  17   51.73    2.46
   2  -3 -17   49.15    2.58
  -2   3 -18   76.60    2.93
   2  -3 -18   85.53    3.44
   2   3  18   84.70    3.26
   2  -3 -18   86.93    3.54
  -2   3 -19   45.59    2.18
   2  -3 -19   49.18    2.53
   2   3  19   46.85    2.38
   2  -3 -19   45.50    2.58
  -2   3 -20   62.17    2.61
   2   3  20   64.58    2.91
   2  -3 -20   63.45    2.97
   2   3  20   60.71    2.75
   2  -3 -20   59.04    2.98
  -2   3 -21   84.11    3.16
   2   3  21   88.20    3.53
   2  -3 -21   92.52    3.64
   2   3  21   83.47    3.31
   2  -3 -21   85.26    3.62
  -2   3 -22   67.03    2.83
   2   3  22   74.35    3.23
   2  -3 -22   77.90    3.35
   2   3  22   71.00    3.03
   2  -3 -22   70.95    3.32
  -2   3 -23   10.28    1.11
  -2  -3  23   11.24    1.09
   2  -3 -23   11.47    1.31
   2   3  23   10.45    1.16
   2  -3 -23   11.04    1.35
  -2  -3  24   75.51    2.83
  -2   3 -24   66.85    2.83
   2  -3 -24   70.97    2.87
   2  -3 -24   75.39    3.31
   2   3  24   62.67    2.85
   2  -3 -24   67.21    3.23
  -2  -3  25   30.40    1.76
  -2   3 -25   28.59    1.81
   2  -3 -25   32.07    1.87
   2  -3 -25   32.55    2.18
   2   3  25   28.79    1.85
   2  -3 -25   31.25    2.21
  -2  -3  26  210.06    5.42
  -2   3 -26  194.96    5.51
   2  -3 -26  205.68    5.57
   2  -3 -26  214.46    6.26
   2  -3 -26  197.73    6.18
   2  -3 -27   22.49    1.85
  -2  -3  27   22.40    1.49
  -2   3 -27   20.15    1.48
   2  -3 -27   19.75    1.47
   2  -3 -27   21.47    1.74
  -2  -3  28  133.38    3.93
  -2   3 -28  119.33    3.95
  -2   3 -28  125.71    4.17
   2  -3 -28  130.77    4.06
   2  -3 -28  140.51    4.66
   2  -3 -28  126.23    4.60
  -2  -3  29  138.69    4.03
  -2   3 -29  138.46    4.18
  -2   3 -29  131.76    4.28
   2  -3 -29  138.54    4.19
   2  -3 -29  139.56    4.79
  -2  -3  30   81.41    2.85
  -2   3 -30   82.09    3.00
  -2   3 -30   86.40    3.19
   2  -3 -30   88.71    3.08
  -2  -3  31    3.75    0.64
  -2   3 -31    2.59    0.64
   2  -3 -31    4.30    0.84
  -2   3 -31    3.73    0.67
   2  -3 -31    3.37    0.62
  -2  -3  32   19.14    1.21
  -2   3 -32   21.88    1.36
  -2   3 -32   21.78    1.41
   2  -3 -32   22.52    1.35
   2  -3 -32   22.62    1.61
  -2  -3  33   17.63    1.10
  -2   3 -33   17.18    1.15
  -2   3 -33   19.31    1.28
   2  -3 -33   19.70    1.21
   2  -3 -33   21.50    1.50
  -2  -3  34    1.51    0.42
  -2   3 -34    1.09    0.44
   2  -3 -34    1.50    0.53
  -2   3 -34    1.90    0.46
   2  -3 -34    1.04    0.38
   2  -3 -34    0.73    0.65
  -2   3 -35    9.51    0.75
  -2   3 -35    9.63    0.82
   2  -3 -35   11.98    1.05
   2  -3 -35    9.98    1.06
  -2   3 -36    2.04    0.40
   2  -3 -36    2.31    0.53
   2  -3 -37    5.06    0.63
  -2   3 -37    3.07    0.40
   2  -3 -38    5.43    0.57
   2  -3 -39    5.69    0.51
   2  -4  37    0.63    0.28
   2  -4  37    0.75    0.23
   2  -4  36   15.30    0.87
   2  -4  36   15.14    0.81
   2  -4  35   15.76    0.94
   2  -4  34   13.46    0.93
   2  -4  33   32.95    1.54
   2  -4  32   21.95    1.30
   2  -4  32   22.37    1.09
  -2  -4 -32   20.58    1.14
   2  -4  31    8.94    0.92
   2  -4  31    8.65    0.75
   2   4 -31    8.78    0.79
  -2  -4 -31    8.16    0.79
   2  -4  30   27.84    1.57
   2  -4  30   28.00    1.39
   2   4 -30   26.66    1.43
  -2  -4 -30   25.33    1.44
   2  -4  29    5.37    0.70
   2   4 -29    6.26    0.78
   2  -4  29    7.09    0.92
  -2  -4 -29    5.72    0.76
   2  -4  28    5.42    0.74
   2  -4  28    4.20    0.79
   2   4 -28    4.28    0.70
  -2  -4 -28    4.57    0.73
   2  -4  27   46.92    2.23
   2  -4  27   53.24    2.14
   2   4 -27   47.39    2.18
  -2  -4 -27   44.40    2.18
   2  -4  26    7.43    0.88
   2  -4  26    6.53    0.95
   2   4 -26    7.77    0.93
  -2  -4 -26    6.71    0.91
   2  -4  25   77.73    3.01
   2  -4  25   83.80    2.92
   2   4 -25   76.43    2.96
  -2  -4 -25   72.18    2.98
   2  -4  24    7.99    1.03
   2  -4  24    8.86    0.97
   2   4 -24    7.58    0.97
  -2  -4 -24    8.30    1.02
   2  -4  23   20.35    1.56
   2  -4  23   20.83    1.42
   2   4 -23   18.51    1.45
  -2  -4 -23   17.00    1.43
   2  -4  22   76.01    3.00
   2  -4  22   83.84    2.94
   2   4 -22   78.65    3.10
   2   4 -22   71.19    3.07
  -2  -4 -22   67.38    3.00
   2  -4  21   10.78    1.07
   2  -4  21   10.83    1.18
   2   4 -21   11.18    1.45
   2   4 -21   11.41    1.18
   2   4 -21   10.61    1.21
  -2  -4 -21    8.75    1.10
   2   4 -21    9.81    1.29
   2   4 -20   72.85    3.60
   2  -4  20   72.81    2.91
   2   4 -20   72.66    3.07
   2   4 -20   70.91    2.96
   2   4 -20   72.66    3.11
  -2  -4 -20   64.11    2.94
   2   4 -20   68.87    3.33
   2  -4  19   22.03    1.44
   2  -4  19   22.07    1.58
   2   4 -19   23.24    2.03
   2   4 -19   21.24    1.65
   2   4 -19   21.68    1.59
   2   4 -19   21.63    1.70
  -2  -4 -19   17.77    1.50
   2   4 -19   20.90    1.79
   2   4 -18   48.21    2.88
   2  -4  18   48.34    2.30
   2   4 -18   51.22    2.52
   2   4 -18   48.14    2.49
  -2  -4 -18   45.51    2.40
   2   4 -18   49.01    2.74
   2   4 -17  162.88    5.62
   2  -4  17  151.86    4.53
   2   4 -17  156.72    4.84
   2   4 -17  157.42    4.90
  -2  -4 -17  141.91    4.67
   2   4 -17  147.87    5.12
   2   4 -16   37.88    2.16
   2   4 -16   38.43    2.22
   2   4 -16   35.54    2.29
   2  -4  16   33.99    1.93
   2   4 -16   38.64    2.55
   2  -4  15   65.76    2.73
   2   4 -15   71.29    2.98
   2   4 -15   72.73    3.10
   2   4 -15   69.11    3.22
  -2   4  15   69.59    2.99
   2   4 -15   71.16    3.43
   2  -4  14  136.92    4.21
   2  -4  14  142.69    4.18
   2   4 -14  141.17    4.34
   2   4 -14  137.64    4.72
   2   4 -14  144.47    4.50
   2   4 -14  146.97    4.64
  -2   4  14  141.26    4.49
   2   4 -14  136.79    5.04
   2  -4  13  162.90    4.64
   2   4 -13  166.40    4.79
   2  -4  13  168.27    4.63
   2   4 -13  169.03    4.95
   2   4 -13  162.29    5.17
   2   4 -13  161.26    4.85
  -2   4  13  173.38    4.95
   2   4 -13  163.45    5.45
   2   4 -12   70.55    2.82
   2  -4  12   76.14    2.77
   2   4 -12   73.05    2.97
  -2   4  12   70.58    2.86
   2   4 -12   74.73    2.96
   2  -4  12   73.18    2.79
   2   4 -12   72.03    3.14
   2   4 -12   71.12    3.36
   2  -4  11  209.32    5.41
   2   4 -11  211.01    5.53
   2  -4  11  213.19    5.38
   2   4 -11  203.21    5.54
  -2   4  11  205.72    5.56
   2   4 -11  216.09    5.99
   2  -4  10   29.99    1.69
   2   4 -10   29.65    1.72
   2  -4  10   28.93    1.64
  -2   4  10   28.71    1.68
   2   4 -10   30.38    1.82
   2   4 -10   27.86    1.88
   2  -4   9   73.11    2.77
   2   4  -9   79.64    2.90
   2  -4   9   73.96    2.75
   2   4  -9   77.72    3.19
   2   4  -9   73.30    2.89
  -2   4   9   76.60    2.85
   2   4  -8  165.29    4.58
   2  -4   8  161.74    4.50
  -2   4   8  164.25    4.56
   2   4  -8  163.66    4.68
   2   4  -8  169.91    5.13
   2  -4   8  156.42    4.47
   2   4  -7   86.02    2.96
   2  -4   7   79.09    2.87
   2   4  -7   81.37    3.02
   2   4  -7   77.00    3.00
   2   4  -7   84.60    3.32
  -2   4   7   80.57    2.86
   2  -4   7   76.04    2.84
  -2   4   6    0.25    0.41
   2   4  -6    0.88    0.47
   2  -4   6    0.29    0.46
   2  -4   6    0.85    0.52
   2   4  -6    0.43    0.60
   2   4  -6    0.73    0.61
   2   4  -6    0.40    0.56
   2  -4   5   94.35    3.18
   2   4  -5  101.05    3.41
   2   4  -5   97.11    3.36
  -2   4   5   94.79    3.11
   2   4  -5   87.09    3.43
   2   4  -5   94.92    3.12
   2  -4   5   94.95    3.21
   2  -4   4   40.94    2.01
   2  -4   4   42.56    2.02
   2   4  -4   46.05    2.19
   2   4  -4   44.22    2.17
   2   4  -4   41.56    2.25
  -2   4   4   41.38    1.93
   2   4  -4   43.87    1.96
   2   4  -3  235.52    5.94
  -2   4   3  231.92    5.60
   2   4  -3  225.66    6.16
   2   4  -3  228.94    5.59
   2   4  -3  232.81    5.96
   2  -4   3  225.93    5.77
   2   4  -2  305.13    6.98
   2   4  -2  321.13    7.39
   2   4  -2  316.34    7.68
  -2   4   2  309.88    6.99
   2  -4   2  295.78    7.14
   2   4  -1 1017.30   19.08
   2   4  -1  984.61   19.43
  -2   4   1  986.59   18.62
   2   4  -1 1016.53   18.67
   2  -4   1  969.93   18.92
   2   4   0  508.41   10.57
   2   4   0  506.79   10.37
   2   4   0  465.77   10.52
  -2   4   0  475.71    9.89
   2   4   0  482.59    9.93
   2  -4   0  476.59   10.18
   2   4   1 1028.39   19.31
  -2   4  -1  981.65   18.67
   2   4   1 1020.70   19.11
   2   4   1 1023.90   19.50
   2   4   1 1020.53   18.72
   2  -4  -1  993.83   19.00
   2   4   2  307.54    7.31
   2   4   2  308.74    6.83
   2   4   2  313.16    7.14
  -2   4  -2  308.80    6.84
   2  -4  -2  307.65    7.11
   2   4   3  234.20    5.88
   2   4   3  238.26    6.07
   2   4   3  232.56    5.60
  -2   4  -3  233.19    5.63
   2  -4  -3  225.15    5.81
   2   4   4   40.11    2.10
   2   4   4   41.88    2.05
   2   4   4   40.57    1.88
  -2   4  -4   41.94    1.91
   2  -4  -4   40.48    2.01
   2   4   5   87.99    3.27
   2   4   5   93.30    3.23
   2   4   5   95.56    3.08
  -2   4  -5   97.41    3.14
   2   4   6    0.70    0.44
  -2   4  -6    1.01    0.44
   2   4   6    0.47    0.53
  -2   4  -7   79.40    2.85
   2   4   7   76.73    2.98
   2   4   7   78.24    2.79
   2   4   7   80.14    3.18
  -2   4  -8  163.03    4.53
   2   4   8  154.19    4.65
   2  -4  -8  166.09    5.01
   2   4   8  165.03    4.50
   2   4   8  160.53    4.89
   2   4   9   72.87    2.94
  -2   4  -9   76.54    2.85
   2  -4  -9   79.91    3.26
   2   4   9   76.51    2.80
   2   4   9   76.82    3.13
   2   4  10   28.78    1.80
  -2   4 -10   29.11    1.70
   2  -4 -10   31.27    2.00
   2   4  10   29.56    1.68
   2   4  10   30.37    1.91
  -2   4 -11  197.11    5.41
   2   4  11  207.65    5.47
   2   4  11  212.74    5.90
  -2   4 -12   72.95    2.84
   2   4  12   67.98    2.73
   2   4  12   70.43    3.04
  -2   4 -13  163.20    4.72
   2   4  13  163.33    4.67
   2   4  13  160.20    4.98
   2  -4 -13  151.85    4.75
  -2   4 -14  138.01    4.27
   2  -4 -14  148.10    4.84
   2   4  14  139.46    4.25
   2   4  14  135.10    4.54
   2  -4 -14  131.94    4.38
  -2   4 -15   64.49    2.73
   2  -4 -15   75.64    3.30
   2   4  15   66.05    2.74
   2   4  15   69.18    3.04
   2  -4 -15   64.73    2.89
  -2   4 -16   35.29    1.96
   2  -4 -16   38.85    2.32
   2   4  16   36.63    2.21
   2  -4 -16   32.99    2.05
   2  -4 -17  164.79    5.29
   2   4  17  153.60    4.99
   2  -4 -17  152.97    4.88
   2  -4 -18   44.39    2.44
  -2   4 -18   48.22    2.35
   2   4  18   48.00    2.56
  -2  -4  19   21.48    1.41
  -2   4 -19   20.91    1.55
   2  -4 -19   22.16    1.81
   2   4  19   20.47    1.67
   2  -4 -19   20.56    1.69
  -2  -4  20   76.41    2.75
  -2   4 -20   66.16    2.87
   2  -4 -20   69.66    2.86
   2  -4 -20   79.98    3.44
   2   4  20   73.85    3.21
   2  -4 -20   67.32    3.10
  -2  -4  21   10.92    1.04
  -2   4 -21   11.33    1.17
   2  -4 -21    9.88    1.07
   2  -4 -21   11.48    1.36
   2   4  21    9.79    1.20
   2  -4 -21    9.10    1.22
  -2  -4  22   75.07    2.75
  -2   4 -22   66.18    2.86
   2  -4 -22   72.93    2.90
   2   4  22   68.94    3.11
   2  -4 -22   69.97    3.16
  -2  -4  23   18.88    1.33
  -2   4 -23   17.52    1.43
   2  -4 -23   19.33    1.45
   2  -4 -23   21.50    1.76
   2   4  23   17.79    1.54
   2  -4 -23   18.98    1.63
  -2  -4  24    7.86    0.89
  -2   4 -24    7.66    0.96
   2  -4 -24    8.01    0.95
   2  -4 -24    8.51    1.18
   2   4  24    8.08    1.06
   2  -4 -24    7.41    1.12
  -2  -4  25   75.74    2.72
  -2   4 -25   74.79    2.92
   2  -4 -25   75.22    2.90
   2  -4 -25   72.39    3.21
  -2  -4  26    6.67    0.81
  -2   4 -26    7.47    0.92
   2  -4 -26    6.78    1.05
   2  -4 -26    5.80    0.82
   2  -4 -26    6.23    1.06
  -2  -4  27   46.98    1.98
  -2   4 -27   44.73    2.11
   2  -4 -27   48.05    2.16
   2  -4 -27   46.51    2.44
  -2  -4  28    4.25    0.63
   2  -4 -28    4.83    0.89
  -2   4 -28    4.03    0.67
   2  -4 -28    4.77    0.70
   2  -4 -28    3.55    0.89
  -2   4 -29    5.46    0.73
  -2   4 -29    5.75    0.81
  -2  -4  29    4.52    0.63
   2  -4 -29    7.21    0.79
   2  -4 -29    7.49    1.02
   2  -4 -29    6.28    1.02
  -2  -4  30   24.01    1.25
  -2   4 -30   25.22    1.41
  -2   4 -30   26.79    1.58
   2  -4 -30   26.17    1.39
   2  -4 -30   29.72    1.82
   2  -4 -30   25.25    1.71
  -2  -4  31    7.44    0.67
  -2   4 -31    7.45    0.74
  -2   4 -31    7.82    0.86
   2  -4 -31    8.33    0.75
   2  -4 -31    9.40    1.01
  -2   4 -32   21.84    1.15
  -2   4 -32   21.44    1.27
   2  -4 -32   24.14    1.50
  -2   4 -33   30.94    1.46
   2  -4 -33   39.51    1.82
  -2   4 -34   12.61    0.84
   2  -4 -34   14.28    1.04
  -2   4 -35   11.52    0.73
   2  -4 -35   17.35    1.03
  -2   4 -36    8.19    0.51
   2  -4 -36   18.74    0.97
   2  -5  34   21.93    0.89
   2  -5  33    8.59    0.63
   2  -5  32    7.04    0.63
   2  -5  32    5.61    0.42
   2  -5  31    5.17    0.61
   2  -5  30    9.53    0.82
   2  -5  29    0.77    0.45
   2  -5  28   17.26    1.16
   2  -5  28   16.67    0.92
  -2  -5 -28   13.53    0.92
  -2  -5 -28   16.01    0.99
   2  -5  27    0.92    0.50
  -2  -5 -27    1.32    0.44
   2  -5  27    1.11    0.39
   2   5 -27    1.11    0.43
  -2  -5 -27    0.80    0.37
   2  -5  26   49.41    2.09
   2  -5  26   48.45    1.81
   2   5 -26   45.94    1.93
  -2  -5 -26   41.90    1.85
   2  -5  25    0.89    0.52
   2  -5  25    0.88    0.41
   2   5 -25    0.43    0.40
  -2  -5 -25    1.09    0.44
   2  -5  24   21.78    1.45
   2  -5  24   26.54    1.38
   2   5 -24   23.69    1.46
  -2  -5 -24   21.54    1.40
   2  -5  23    6.92    0.78
   2  -5  23    5.94    0.88
   2   5 -23    6.02    0.83
  -2  -5 -23    6.02    0.81
   2  -5  22    8.96    1.04
   2  -5  22    8.81    0.89
   2   5 -22    8.33    0.96
  -2  -5 -22    6.69    0.87
   2  -5  21  120.13    3.48
   2  -5  21  112.71    3.67
   2   5 -21  118.08    3.80
   2  -5  20   84.81    3.10
   2   5 -20   83.03    3.16
   2  -5  20   88.71    2.90
   2  -5  19   49.85    2.13
   2   5 -19   45.21    2.76
   2  -5  19   49.75    2.30
   2   5 -19   50.55    2.41
  -2  -5 -19   42.41    2.24
   2  -5  18   99.21    3.18
   2   5 -18   93.35    4.09
   2  -5  18   93.42    3.35
   2   5 -18  101.37    3.58
   2   5 -17  291.46    8.16
   2  -5  17  274.09    6.86
   2   5 -17  293.71    7.23
  -2  -5 -17  262.38    7.05
   2  -5  17  305.10    6.77
   2   5 -16   91.21    4.07
   2  -5  16   88.43    3.27
   2   5 -16   90.81    3.45
  -2  -5 -16   86.14    3.40
  -2  -5 -16   87.15    3.40
   2  -5  16  100.19    3.18
   2  -5  15  116.68    3.85
   2   5 -15  120.39    4.09
  -2  -5 -15  112.55    4.01
  -2  -5 -15  111.64    3.96
   2   5 -15  117.62    4.36
   2  -5  15  130.87    3.76
   2   5 -15  121.30    4.72
   2  -5  14  178.63    5.07
   2   5 -14  191.43    5.44
   2   5 -14  186.38    5.48
  -2  -5 -14  172.82    5.28
  -2  -5 -14  171.71    5.23
   2   5 -14  188.18    5.74
   2  -5  14  197.77    4.92
   2   5 -14  181.95    5.98
   2  -5  13   13.44    1.25
   2   5 -13   14.33    1.32
   2   5 -13   16.99    1.50
  -2  -5 -13   14.01    1.32
  -2  -5 -13   12.55    1.27
   2   5 -13   13.02    1.40
   2  -5  13   15.10    1.17
   2   5 -13   13.40    1.51
   2  -5  12   10.88    1.14
   2  -5  12    9.13    1.03
   2   5 -12   10.05    1.13
   2   5 -12   10.19    1.25
   2  -5  12   10.50    0.98
  -2  -5 -12   10.50    1.14
  -2  -5 -12    9.87    1.12
   2   5 -12    8.33    1.15
   2   5 -12   10.10    1.36
   2  -5  11   43.74    2.15
   2  -5  11   41.60    2.11
   2   5 -11   38.74    2.17
   2   5 -11   42.35    2.34
  -2  -5 -11   40.11    2.18
  -2  -5 -11   40.41    2.18
   2   5 -11   41.62    2.40
   2  -5  11   42.87    1.96
   2   5 -11   40.94    2.56
   2  -5  10   22.90    1.57
   2   5 -10   23.99    1.81
   2   5 -10   27.88    1.85
  -2  -5 -10   25.16    1.70
  -2  -5 -10   22.43    1.61
   2  -5  10   23.73    1.61
   2   5 -10   25.82    2.03
   2  -5   9  120.96    3.87
   2  -5   9  116.03    3.84
   2   5  -9  124.59    4.15
  -2  -5  -9  115.44    3.89
   2   5  -9  119.82    4.25
   2  -5   8   55.94    2.47
   2  -5   8   54.29    2.47
   2   5  -8   59.33    2.70
   2   5  -8   56.48    2.53
  -2  -5  -8   48.15    2.34
   2   5  -8   53.77    2.74
   2  -5   7   83.49    3.13
   2  -5   7   86.67    3.21
   2   5  -7   88.48    3.40
   2   5  -7   86.05    3.21
   2   5  -7   89.89    3.62
   2  -5   6   69.02    2.84
   2   5  -6   75.87    3.06
   2   5  -6   67.40    3.10
   2   5  -6   71.46    2.90
   2  -5   6   71.43    2.87
   2  -5   5   12.30    1.20
   2   5  -5   14.27    1.38
   2   5  -5   13.82    1.31
   2  -5   5   12.21    1.22
   2   5  -5   16.21    1.52
   2  -5   4  263.74    6.60
   2   5  -4  271.20    7.15
   2   5  -4  273.02    6.79
  -2   5   4  264.99    6.65
   2  -5   4  257.19    6.58
   2   5  -4  248.00    6.55
   2  -5   3  228.08    6.11
   2   5  -3  247.27    6.33
   2   5  -3  245.67    6.30
   2   5  -3  242.64    6.65
  -2   5   3  234.00    6.13
   2  -5   3  229.99    6.10
   2  -5   2  141.22    4.48
   2   5  -2  156.38    5.03
   2   5  -2  163.57    4.74
  -2   5   2  147.25    4.49
   2   5  -2  155.76    4.72
   2  -5   2  147.44    4.52
   2   5  -1  167.71    4.87
   2   5  -1  162.51    4.88
   2   5  -1  158.34    5.13
  -2   5   1  156.22    4.65
   2  -5   1  154.19    4.67
   2   5   0  245.71    6.32
   2   5   0  249.68    6.74
  -2   5   0  234.18    6.12
   2  -5   0  232.82    6.23
   2   5   1  161.13    4.79
   2   5   1  160.45    5.18
  -2   5  -1  156.24    4.66
   2  -5  -1  161.61    4.80
   2   5   2  157.17    4.69
   2   5   2  160.00    5.09
  -2   5  -2  154.97    4.61
   2  -5  -2  151.75    4.68
   2   5   3  254.48    6.58
   2   5   3  240.87    6.27
   2   5   3  251.30    6.84
  -2   5  -3  237.02    6.24
   2  -5  -3  233.04    6.30
   2   5   4  290.42    7.12
   2   5   4  279.83    6.89
   2   5   4  271.94    7.41
  -2   5  -4  262.27    6.78
   2  -5  -4  272.82    6.95
   2   5   5   14.02    1.31
   2   5   5   14.71    1.34
   2   5   5   12.75    1.42
   2  -5  -5   13.47    1.31
  -2   5  -5   11.70    1.17
   2   5   6   77.81    3.10
   2   5   6   73.25    2.97
   2   5   6   75.39    3.35
   2  -5  -6   70.96    2.98
   2   5   7   85.98    3.30
   2   5   7   88.06    3.27
   2   5   7   91.86    3.69
   2  -5  -7   86.59    3.32
   2   5   8   54.06    2.56
   2   5   8   56.68    2.54
   2   5   8   50.67    2.75
   2  -5  -8   55.06    2.57
   2   5   9  122.02    4.04
   2   5   9  118.48    3.89
  -2   5  -9  115.01    3.93
  -2  -5   9  110.33    3.41
   2   5  10   27.03    1.76
   2   5  10   24.68    1.67
  -2   5 -10   27.93    1.79
  -2  -5  10   24.26    1.43
   2   5  11   41.70    2.22
   2   5  11   42.54    2.16
  -2   5 -11   42.28    2.23
  -2  -5  11   40.16    1.87
   2   5  12    8.92    1.05
   2   5  12    9.43    1.06
  -2   5 -12    9.26    1.09
   2  -5 -12    8.03    0.94
   2  -5 -12    9.62    1.02
  -2  -5  12    9.51    0.92
   2   5  12    7.90    1.15
   2   5  13   13.45    1.26
   2   5  13   13.67    1.27
  -2   5 -13   13.32    1.29
   2  -5 -13   13.12    1.17
   2  -5 -13   13.98    1.20
   2   5  13   14.10    1.44
  -2  -5  13   13.22    1.07
   2   5  14  179.62    5.20
   2   5  14  182.32    5.05
  -2   5 -14  178.62    5.25
   2  -5 -14  180.78    4.99
   2  -5 -14  179.33    4.94
   2   5  14  174.75    5.61
  -2  -5  14  169.09    4.59
   2   5  15  116.76    3.99
   2   5  15  117.17    3.82
  -2   5 -15  117.49    4.03
   2  -5 -15  121.11    3.85
   2  -5 -15  114.53    3.75
   2   5  15  124.33    4.45
  -2  -5  15  117.09    3.52
   2   5  16   84.75    3.29
   2   5  16   84.43    3.13
  -2   5 -16   92.34    3.43
   2  -5 -16   97.86    3.89
   2  -5 -16   90.21    3.21
   2  -5 -16   89.01    3.17
   2   5  16   82.83    3.60
  -2  -5  16   86.74    2.91
   2   5  17  265.75    6.62
  -2   5 -17  277.15    6.99
   2  -5 -17  272.62    6.72
   2  -5 -17  271.54    6.69
   2   5  17  276.87    7.50
  -2  -5  17  274.44    6.35
   2   5  18   89.94    3.20
  -2   5 -18   96.59    3.52
   2  -5 -18  101.71    4.00
   2  -5 -18   93.95    3.29
   2   5  18   95.52    3.84
  -2  -5  18   94.21    3.02
  -2  -5  19   44.29    1.94
   2   5  19   41.78    2.04
  -2   5 -19   45.84    2.29
   2  -5 -19   47.50    2.19
   2  -5 -19   51.37    2.71
   2   5  19   45.71    2.56
  -2  -5  20   79.36    2.69
   2   5  20   73.29    2.74
  -2   5 -20   80.18    3.07
   2  -5 -20   78.10    2.91
   2  -5 -20   84.87    3.55
  -2  -5  21  106.29    3.22
  -2   5 -21  114.20    3.72
   2  -5 -21  116.10    3.58
   2  -5 -21  123.88    4.30
  -2  -5  22    7.97    0.82
  -2   5 -22    7.65    0.94
   2  -5 -22    8.05    0.88
   2  -5 -22    9.56    1.25
  -2  -5  23    4.73    0.64
   2  -5 -23    6.00    0.76
   2  -5 -23    6.09    1.04
  -2   5 -23    5.50    0.79
  -2  -5  24   22.31    1.25
  -2   5 -24   21.87    1.40
   2  -5 -24   23.05    1.37
   2  -5 -24   24.51    1.76
  -2  -5  25    0.63    0.37
   2  -5 -25    1.48    0.66
  -2   5 -25    1.02    0.47
   2  -5 -25    1.37    0.45
  -2   5 -26   44.91    1.90
   2  -5 -26   49.87    2.37
   2  -5 -26   46.16    1.84
   2  -5 -26   48.46    1.87
  -2  -5  27    0.87    0.35
   2  -5 -27    0.82    0.56
  -2   5 -27    0.43    0.35
   2  -5 -27    0.84    0.36
  -2   5 -28   14.19    0.94
   2  -5 -28   17.77    1.30
  -2   5 -29    1.04    0.44
  -2   5 -30    9.06    0.79
  -2   5 -31    4.14    0.51
  -2   5 -32    6.25    0.55
  -2   5 -33    4.31    0.39
   2  -6  30   10.95    0.58
   2  -6  29    2.01    0.35
   2  -6  28   30.13    1.21
   2  -6  27   16.28    0.93
   2  -6  26   15.12    0.96
   2  -6  25    7.73    0.75
   2  -6  24   24.64    1.31
   2  -6  23    3.57    0.64
  -2  -6 -23    2.92    0.46
   2  -6  22   29.82    1.53
   2  -6  22   29.39    1.24
  -2  -6 -22   27.54    1.32
   2  -6  21    8.22    0.90
   2  -6  21    7.85    0.69
   2   6 -21    6.79    0.73
  -2  -6 -21    7.11    0.74
   2  -6  20   17.89    1.25
   2  -6  20   20.16    1.10
   2   6 -20   18.16    1.19
  -2  -6 -20   18.33    1.17
   2  -6  19   36.02    1.53
   2  -6  19   34.69    1.77
   2   6 -19   34.02    1.71
  -2  -6 -19   33.80    1.65
   2  -6  18   46.25    1.80
   2  -6  18   45.33    2.06
   2   6 -18   44.26    2.01
  -2  -6 -18   43.31    1.96
   2  -6  17    7.27    0.75
   2  -6  17    6.63    0.88
   2   6 -17    6.49    0.85
  -2  -6 -17    5.93    0.78
   2  -6  16    6.20    0.87
   2   6 -16    6.13    0.85
  -2  -6 -16    6.37    0.84
   2  -6  16    6.95    0.75
   2  -6  15   34.52    1.84
   2   6 -15   34.14    1.89
   2   6 -15   36.10    2.04
  -2  -6 -15   31.94    1.79
   2  -6  15   34.27    1.60
   2  -6  14   28.52    1.67
   2   6 -14   26.79    1.69
   2   6 -14   28.58    1.82
  -2  -6 -14   26.71    1.65
   2  -6  14   27.90    1.46
   2  -6  13    2.73    0.73
   2   6 -13    2.98    0.79
  -2  -6 -13    2.74    0.68
   2  -6  13    2.11    0.54
   2   6 -13    2.77    0.68
   2  -6  12    1.40    0.65
   2   6 -12    1.56    0.73
  -2  -6 -12    1.37    0.59
   2  -6  12    1.50    0.49
   2   6 -12    1.67    0.58
   2  -6  11    0.53    0.58
   2   6 -11    0.77    0.60
  -2  -6 -11    0.90    0.55
   2  -6  11    1.25    0.48
   2   6 -11    0.71    0.53
   2  -6  10    8.40    1.03
   2   6 -10    7.88    1.00
   2   6 -10    8.63    1.08
  -2  -6 -10    7.86    0.97
   2  -6  10    7.71    0.83
   2  -6   9   41.08    2.11
  -2  -6  -9   41.20    2.12
   2   6  -9   39.17    2.15
   2   6  -9   41.54    2.24
   2  -6   9   42.82    1.90
   2   6  -9   42.06    2.54
   2   6  -8    1.68    0.73
   2  -6   8    1.84    0.68
   2   6  -8    1.83    0.66
  -2  -6  -8    2.49    0.66
   2  -6   8    2.07    0.56
   2   6  -8    1.59    0.64
   2  -6   7   17.74    1.40
  -2  -6  -7   20.86    1.51
   2   6  -7   20.70    1.55
   2   6  -7   20.80    1.60
   2  -6   7   19.72    1.30
   2   6  -7   18.49    1.56
   2   6  -7   20.33    1.77
   2  -6   6   49.22    2.37
   2   6  -6   51.49    2.49
   2   6  -6   51.80    2.45
  -2  -6  -6   50.62    2.35
   2   6  -6   47.88    2.52
   2  -6   6   52.19    2.16
   2  -6   5  110.81    3.74
   2   6  -5  112.33    3.88
  -2  -6  -5  109.08    3.67
   2   6  -5  114.82    3.82
   2   6  -5  112.54    4.08
   2  -6   5  113.50    3.45
   2  -6   4    2.44    0.75
   2  -6   4    1.06    0.67
   2   6  -4    3.43    0.85
  -2  -6  -4    2.14    0.72
   2  -6   4    2.04    0.62
   2   6  -4    1.72    0.66
   2   6  -4    3.09    0.82
   2  -6   3   45.98    2.04
   2  -6   3   37.37    2.08
   2   6  -3   45.87    2.32
   2   6  -3   47.65    2.30
  -2  -6  -3   41.71    2.11
   2   6  -3   45.46    2.19
   2   6  -3   45.76    2.48
   2  -6   3   44.72    2.24
   2  -6   2   81.61    3.17
   2  -6   2   85.91    2.95
   2   6  -2   91.01    3.26
   2   6  -2   85.31    3.16
   2   6  -2   90.24    3.61
  -2  -6  -2   82.53    3.04
   2  -6   2   88.61    3.29
   2  -6   1   36.69    2.05
   2  -6   1   44.70    2.00
   2   6  -1   38.47    2.07
   2   6  -1   40.02    2.09
  -2  -6  -1   39.18    1.98
   2   6  -1   40.78    2.36
   2  -6   1   39.11    2.12
   2  -6   0   50.43    2.43
   2   6   0   53.37    2.44
  -2  -6   0   52.01    2.28
   2  -6   0   52.72    2.23
   2   6   0   52.73    2.73
   2   6   0   53.98    2.49
   2  -6   0   54.91    2.54
   2  -6  -1   34.48    2.05
   2   6   1   42.48    2.42
   2   6   1   40.50    2.08
   2   6   1   39.63    2.13
   2  -6  -1   37.19    1.87
  -2  -6   1   36.59    1.89
   2  -6  -1   38.68    2.13
   2  -6  -2   84.79    3.25
   2   6   2   88.10    3.18
   2  -6  -2   89.98    3.03
  -2  -6   2   82.50    2.96
   2   6   2   84.55    3.28
   2   6   2   88.96    3.62
   2  -6  -2   90.31    3.38
   2  -6  -3   48.15    2.36
  -2   6  -3   47.93    2.38
   2   6   3   43.47    2.16
   2  -6  -3   43.41    2.05
   2   6   3   48.51    2.40
  -2  -6   3   40.77    1.99
   2   6   3   45.53    2.53
   2  -6  -3   48.08    2.38
   2   6   4    2.73    0.79
   2  -6  -4    2.28    0.79
   2   6   4    2.18    0.67
   2  -6  -4    2.27    0.63
  -2  -6   4    1.83    0.60
  -2   6  -4    2.39    0.67
   2   6   4    1.91    0.71
  -2   6  -5  116.51    3.96
   2   6   5  113.43    3.66
  -2  -6   5  106.80    3.40
   2   6   5  115.49    4.22
   2  -6  -5  112.67    3.54
   2  -6  -5  116.08    3.93
  -2   6  -6   50.22    2.45
   2   6   6   50.41    2.28
   2   6   6   50.86    2.68
   2  -6  -6   50.15    2.19
  -2  -6   6   45.84    2.04
   2  -6  -6   51.36    2.49
   2   6   7   19.50    1.40
  -2   6  -7   18.84    1.50
   2   6   7   19.69    1.66
  -2  -6   7   18.67    1.26
   2  -6  -7   19.60    1.35
   2  -6  -7   19.65    1.56
   2  -6  -8    2.06    0.77
   2   6   8    1.74    0.59
   2  -6  -8    1.86    0.58
  -2  -6   8    1.62    0.52
  -2   6  -8    1.29    0.59
   2   6   8    2.12    0.75
   2   6   9   36.25    1.87
  -2   6  -9   41.77    2.20
   2   6   9   41.77    2.40
  -2  -6   9   36.58    1.76
   2  -6  -9   40.29    1.93
   2  -6  -9   40.50    2.19
   2   6  10    7.62    0.89
  -2   6 -10    9.99    1.10
   2  -6 -10    8.79    0.94
  -2  -6  10    6.98    0.79
   2  -6 -10    7.14    1.07
   2  -6 -11    0.85    0.61
   2   6  11    0.59    0.49
   2  -6 -11    1.23    0.54
  -2  -6  11    0.89    0.44
  -2   6 -11    1.04    0.54
   2  -6 -12    1.50    0.64
   2   6  12    1.52    0.52
   2  -6 -12    1.09    0.52
  -2  -6  12    1.29    0.46
  -2   6 -12    1.22    0.56
   2  -6 -13    2.92    0.75
   2   6  13    2.30    0.57
   2  -6 -13    2.39    0.61
  -2  -6  13    1.72    0.47
  -2   6 -13    2.35    0.63
  -2   6 -14   25.90    1.66
   2  -6 -14   26.99    1.54
  -2  -6  14   26.56    1.40
   2  -6 -14   28.89    1.81
  -2   6 -15   32.90    1.82
   2  -6 -15   34.45    1.71
   2  -6 -15   31.45    1.90
  -2  -6  15   30.78    1.50
  -2   6 -16    7.94    0.93
   2  -6 -16    7.83    0.85
   2  -6 -16    7.19    0.96
  -2  -6  16    6.42    0.71
   2  -6 -17    6.47    0.91
  -2  -6  17    5.47    0.65
  -2   6 -17    6.63    0.85
   2  -6 -17    6.59    0.77
  -2  -6  18   43.30    1.72
  -2   6 -18   41.37    1.96
   2  -6 -18   45.18    1.88
  -2  -6  19   31.98    1.42
  -2   6 -19   32.92    1.67
   2  -6 -19   33.11    1.56
   2  -6 -19   35.40    1.79
  -2  -6  20   16.86    0.99
  -2   6 -20   17.16    1.17
   2  -6 -20   17.40    1.08
   2  -6 -20   19.43    1.31
  -2  -6  21    6.79    0.63
  -2   6 -21    5.96    0.70
   2  -6 -21    7.60    0.85
  -2  -6  22   25.46    1.15
  -2   6 -22   26.01    1.32
   2  -6 -23    3.53    0.59
   2  -6 -24   24.24    1.20
   2  -6 -25    8.09    0.66
   2  -6 -26   13.35    0.75
  -2   6 -27   14.53    0.87
  -2   6 -28   21.84    0.98
  -2   6 -29    1.20    0.24
   2   6  30    5.61    0.46
   2  -7  24    9.06    0.49
   2  -7  23    9.00    0.56
   2  -7  22    4.34    0.46
   2  -7  21   11.24    0.73
   2  -7  20   11.37    0.79
   2  -7  19   15.68    0.95
   2  -7  18    3.65    0.57
   2  -7  17    0.44    0.39
   2  -7  16    8.07    0.77
   2  -7  15    7.55    0.79
   2  -7  14   18.11    1.15
   2  -7  13   10.80    0.95
  -2  -7 -13    8.81    0.72
   2  -7  12    0.21    0.47
  -2  -7 -12    0.20    0.33
   2  -7  11   27.21    1.48
   2   7 -11   23.34    1.30
  -2  -7 -11   23.95    1.24
   2  -7  11   25.94    1.16
   2  -7  10    4.36    0.71
   2   7 -10    5.21    0.67
  -2  -7 -10    4.17    0.61
   2  -7  10    5.16    0.57
   2  -7   9    7.35    0.88
   2   7  -9    6.72    0.79
  -2  -7  -9    8.43    0.78
   2  -7   9    6.79    0.66
   2  -7   8   35.89    1.77
   2   7  -8   32.48    1.65
   2   7  -8   35.69    1.73
  -2  -7  -8   35.96    1.61
   2  -7   8   36.71    1.47
   2  -7   7   20.62    1.35
   2   7  -7   15.81    1.17
   2   7  -7   18.18    1.23
  -2  -7  -7   18.53    1.16
   2  -7   7   18.41    1.04
   2  -7   6   21.20    1.39
   2   7  -6   19.44    1.30
   2   7  -6   20.86    1.32
  -2  -7  -6   21.51    1.27
   2  -7   6   21.72    1.15
   2  -7   5   33.97    1.74
   2  -7   5   28.58    1.50
  -2  -7  -5   31.08    1.55
   2   7  -5   29.47    1.61
   2   7  -5   33.14    1.64
   2  -7   5   31.23    1.40
   2  -7   4    7.64    0.91
   2  -7   4    6.25    0.79
   2   7  -4    6.06    0.79
   2   7  -4    7.81    0.87
  -2  -7  -4    7.93    0.82
   2  -7   4    7.66    0.72
   2  -7   3   18.10    1.29
   2  -7   3   16.48    1.17
  -2   7   3   16.73    1.29
   2   7  -3   17.57    1.25
   2   7  -3   16.30    1.17
  -2  -7  -3   18.59    1.20
   2  -7   3   17.97    1.08
   2  -7   2    3.84    0.71
   2  -7   2    2.82    0.62
   2   7  -2    3.97    0.68
  -2  -7  -2    3.18    0.59
   2  -7   2    3.17    0.56
  -2   7   2    2.86    0.64
   2   7  -2    2.64    0.62
   2  -7   1   10.46    1.04
   2  -7   1    8.02    0.85
  -2   7   1    9.86    1.02
   2   7  -1    9.10    0.93
   2   7  -1    8.32    0.86
  -2  -7  -1    9.60    0.88
   2  -7   1    8.54    0.77
   2  -7   0    0.44    0.54
   2  -7   0   -0.03    0.45
   2   7   0    0.66    0.45
  -2  -7   0    0.31    0.42
   2  -7   0    0.15    0.35
   2   7   0    0.18    0.43
  -2   7   0    0.27    0.45
   2  -7  -1    8.26    0.87
   2   7   1    8.32    0.91
  -2   7  -1   10.32    1.03
   2   7   1    8.90    0.85
   2  -7  -1    9.50    0.81
  -2  -7   1   10.07    0.89
   2  -7  -1   10.66    1.06
   2  -7  -2    3.61    0.70
   2  -7  -2    2.17    0.58
   2   7   2    3.13    0.58
   2  -7  -2    3.11    0.54
  -2  -7   2    3.41    0.58
   2   7   2    2.46    0.58
  -2   7  -2    2.75    0.65
   2  -7  -3   15.49    1.19
   2   7   3   16.91    1.22
  -2   7  -3   17.09    1.28
   2   7   3   16.02    1.07
   2   7   3   16.77    1.14
   2  -7  -3   18.62    1.11
  -2  -7   3   15.61    1.06
   2  -7  -3   18.44    1.31
   2  -7  -4    6.84    0.82
  -2   7  -4    7.26    0.88
   2   7   4    7.15    0.74
   2   7   4    6.66    0.80
   2  -7  -4    8.16    0.76
  -2  -7   4    7.54    0.76
   2  -7  -4    7.73    0.91
   2  -7  -5   28.02    1.56
  -2   7  -5   29.30    1.66
   2   7   5   29.88    1.55
   2  -7  -5   31.32    1.43
  -2  -7   5   32.86    1.50
   2  -7  -5   32.97    1.73
   2  -7  -6   20.39    1.33
  -2   7  -6   19.62    1.33
   2   7   6   17.77    1.22
   2  -7  -6   21.36    1.18
  -2  -7   6   20.97    1.19
   2  -7  -6   20.91    1.39
   2  -7  -7   18.22    1.28
   2  -7  -7   19.10    1.10
  -2   7  -7   18.29    1.28
   2   7   7   18.02    1.22
  -2  -7   7   17.97    1.09
   2  -7  -7   19.00    1.30
   2  -7  -8   34.82    1.71
   2   7   8   32.70    1.66
   2  -7  -8   36.32    1.51
  -2   7  -8   36.15    1.77
  -2  -7   8   35.83    1.52
   2  -7  -8   34.94    1.80
   2  -7  -9    7.17    0.83
  -2   7  -9    6.62    0.77
   2   7   9    6.65    0.83
   2  -7  -9    7.30    0.69
  -2  -7   9    6.47    0.67
   2  -7  -9    7.35    0.88
   2  -7 -10    5.23    0.75
   2  -7 -10    5.43    0.76
  -2   7 -10    4.63    0.67
   2  -7 -10    4.95    0.58
   2   7  10    4.23    0.71
  -2  -7  10    4.27    0.55
   2  -7 -11   22.81    1.35
  -2   7 -11   24.87    1.36
   2   7  11   25.09    1.46
  -2  -7  11   25.84    1.20
   2  -7 -11   25.36    1.44
   2   7  12    0.37    0.49
   2  -7 -12    0.13    0.45
   2  -7 -12    0.24    0.41
  -2  -7  12    0.43    0.34
  -2   7 -12    0.15    0.36
   2  -7 -13   10.04    0.89
   2   7  13    8.25    0.89
   2  -7 -13    9.38    0.91
   2  -7 -14   19.10    1.18
   2   7  14   16.96    1.20
   2  -7 -14   19.05    1.17
   2  -7 -15    7.77    0.77
   2   7  15    7.28    0.83
   2  -7 -15    7.22    0.74
   2  -7 -16    7.05    0.72
   2   7  16    7.73    0.84
   2  -7 -16    7.22    0.70
   2  -7 -17    0.87    0.37
   2  -7 -17    0.66    0.38
   2   7  17    0.54    0.49
   2  -7 -18    3.86    0.53
   2   7  18    3.82    0.65
   2  -7 -18    3.99    0.51
   2  -7 -19   14.99    0.87
   2   7  19   15.80    1.05
   2  -7 -19   14.26    0.81
   2  -7 -20   10.14    0.67
   2   7  20    9.99    0.81
   2  -7 -20    9.28    0.60
   2  -7 -21   10.03    0.61
   2   7  21    9.57    0.78
   2  -7 -21    9.22    0.53
   2  -7 -22    4.06    0.37
   2   7  22    3.96    0.52
  -2   7 -23    5.80    0.43
   2   7  23    6.09    0.53
   2  -8  13   36.95    1.11
   2  -8  12   10.57    0.58
   2  -8  11    9.85    0.60
   2  -8  10    4.48    0.45
   2  -8   9    3.23    0.41
   2  -8   8   18.18    0.88
   2  -8   7   26.08    1.09
   2  -8   6    2.25    0.40
   2  -8   5   22.80    1.04
   2  -8   4   14.54    0.85
   2  -8   3    3.84    0.49
   2  -8   2    2.62    0.45
   2  -8   1    2.72    0.45
   2  -8   0    9.34    0.71
   2  -8  -1    3.17    0.47
   2  -8  -2    2.77    0.46
   2  -8  -3    3.64    0.47
   2  -8  -4   12.96    0.79
   2  -8  -5   20.91    0.97
   2  -8  -6    2.19    0.39
   2  -8  -7   23.62    0.98
   2  -8  -8   17.55    0.81
   2  -8  -9    3.31    0.37
   2  -8 -10    4.00    0.36
   2  -8 -11    9.19    0.48
   3   0   0    1.21    0.48
   3   0   0    3.47    0.75
   3   0   1  384.03    8.06
   3   0  -1  391.22    8.05
   3   0  -1  388.88    8.42
   3   0   1  378.80    8.24
   3   0   2   46.31    1.94
   3   0  -2   50.78    2.00
   3   0   2   48.23    2.03
   3   0  -2   49.41    2.20
   3   0   3  486.04    9.94
   3   0  -3  522.74   10.04
   3   0   3  490.74   10.01
   3   0  -3  487.71   10.43
   3   0   4   63.22    2.33
   3   0   4   62.76    2.28
   3   0  -4   66.66    2.66
   3   0   5   51.79    2.09
   3   0  -5   52.37    2.44
   3   0  -5   54.57    2.42
   3   0  -6   45.61    2.31
   3   0  -6   47.43    2.32
   3   0  -7  126.51    4.16
   3   0  -7  127.69    4.16
   3   0   8    4.54    0.68
   3   0  -8    3.29    0.65
   3   0  -8    3.45    0.87
   3   0  -8    4.36    0.92
   3   0   9   74.15    2.74
   3   0  -9   74.19    2.84
   3   0  -9   69.93    3.03
   3   0 -10    8.63    1.21
   3   0  10    7.66    0.90
   3   0 -10    7.49    0.93
   3   0 -10    8.89    1.18
   3   0  11   53.98    2.35
   3   0 -11   52.31    2.42
   3   0 -11   55.22    2.78
   3   0 -11   52.50    2.67
   3   0  12    0.54    0.49
   3   0 -12    0.12    0.46
   3   0 -12   -0.24    0.77
   3   0 -12    0.66    0.72
   3   0  13   27.47    1.71
   3   0 -13   28.54    1.81
   3   0 -13   26.54    2.04
   3   0 -13   28.31    1.99
   3   0 -14  518.56   12.02
   3   0 -14  562.56   12.00
   3   0  14  537.91   11.39
   3   0 -14  520.49   11.53
   3   0 -14  532.02   11.96
   3   0 -15   20.30    1.76
   3   0  15   20.00    1.52
   3   0 -15   18.68    1.55
   3   0 -15   18.85    1.75
   3   0 -15   21.17    1.92
   3   0 -16   74.21    3.37
   3   0  16   75.20    3.06
   3   0 -16   72.43    3.14
   3   0 -16   72.93    3.45
   3   0 -16   72.03    3.32
   3   0 -17   35.54    2.30
   3   0  17   28.27    1.84
   3   0 -17   27.96    1.95
   3   0 -17   28.59    2.22
   3   0 -17   28.96    2.09
   3   0 -18  105.03    4.22
   3   0  18  103.11    3.84
   3   0 -18  110.43    4.10
   3   0 -18  105.60    4.21
   3   0 -19   38.76    2.51
   3   0  19   38.39    2.23
   3   0 -19   36.30    2.30
   3   0 -20  638.55   14.07
   3   0  20  623.98   13.49
   3   0 -20  636.44   13.87
   3   0 -21   40.10    2.61
   3   0  21   38.99    2.32
   3   0 -21   38.83    2.42
   3   0 -21   34.43    2.56
   3   0 -22    2.85    1.07
   3   0  22    1.43    0.81
   3   0 -22    1.26    0.73
   3   0 -22    1.47    1.08
   3   0 -23  330.88    8.78
   3   0  23  323.65    8.36
   3   0 -23  338.72    8.72
   3   0 -23  330.20    8.77
   3   0 -24   40.41    2.57
   3   0  24   39.64    2.38
   3   0 -24   38.82    2.47
   3   0 -24   40.65    2.62
   3   0 -25  246.93    7.18
   3   0  25  243.79    6.90
   3   0 -25  254.57    7.19
   3   0 -25  242.93    7.27
   3   0 -26   36.97    2.51
   3   0  26   38.38    2.38
   3   0 -26   39.33    2.46
   3   0 -26   39.48    2.61
   3   0 -27   44.13    2.60
   3   0  27   38.80    2.39
   3   0 -27   40.41    2.54
   3   0 -28    5.04    1.13
   3   0  28    3.27    0.85
   3   0 -28    5.83    1.19
   3   0 -29   13.58    1.52
   3   0  29   14.93    1.49
   3   0 -29   12.24    1.46
   3   0 -30   12.06    1.46
   3   0  30   12.60    1.37
   3   0 -30   11.18    1.43
   3   0 -31   91.56    3.65
   3   0  31   90.38    3.50
   3   0 -31   92.42    3.61
   3   0 -32  418.53    9.76
   3   0 -32  429.22    9.59
   3   0 -33   18.07    1.55
   3   0 -33   18.55    1.51
   3   0 -34   11.09    1.07
   3   0 -35   25.84    1.46
   3   0 -36    3.87    0.62
   3   0  37    5.11    0.65
   3   0 -37    4.04    0.53
   3   0 -38   19.38    0.82
   3  -1  38   45.12    1.56
   3  -1  37   13.82    0.94
   3  -1  36    8.22    0.82
   3   1 -36    4.90    0.52
   3  -1  35   26.54    1.50
   3   1 -35   24.01    1.25
   3   1 -34   18.95    1.43
   3  -1  34   20.30    1.40
   3   1 -34   17.31    1.18
   3   1 -33   48.34    2.40
   3   1 -33   51.63    2.26
   3  -1  32   45.43    2.27
   3   1 -32   40.87    2.13
   3  -1  31    1.51    0.65
   3   1 -31    1.21    0.74
   3  -1  30   30.29    1.95
   3   1 -30   28.59    1.95
   3  -1  29    2.89    0.64
   3  -1  29    3.04    0.81
   3   1 -29    3.06    0.91
   3  -1  28    5.65    0.79
   3  -1  28    4.39    0.88
   3   1 -28    3.43    0.95
   3  -1  27   21.48    1.44
   3  -1  27   21.24    1.69
   3   1 -27   21.79    1.86
   3  -1  26   44.52    2.08
   3  -1  26   43.16    2.39
   3   1 -26   47.63    2.72
   3   1 -26   42.64    2.61
   3  -1  25   37.18    1.90
   3  -1  25   36.65    2.21
   3   1 -25   38.00    2.45
   3   1 -25   38.73    2.57
   3   1 -24  197.05    6.33
   3  -1  24  193.44    5.82
   3   1 -24  209.28    6.39
   3  -1  23  151.16    4.91
   3   1 -23  156.36    5.41
   3   1 -23  158.71    5.48
   3  -1  22  234.49    6.52
   3   1 -22  237.98    7.06
   3   1 -22  254.86    7.23
   3  -1  21  396.43    9.28
   3   1 -21  413.84   10.06
   3   1 -21  410.21   10.14
   3   1 -20   23.92    2.07
   3  -1  20   25.54    1.76
   3   1 -20   26.67    2.06
   3   1 -20   24.89    2.13
   3   1 -20   21.97    1.97
   3   1 -19    7.94    1.33
   3  -1  19    7.55    1.05
   3   1 -19    7.02    1.16
   3   1 -19    6.85    1.38
   3   1 -19    6.96    1.24
   3   1 -18  164.89    5.58
   3  -1  18  168.38    5.05
   3   1 -18  175.80    5.63
   3   1 -18  172.84    5.77
   3   1 -18  169.81    5.69
   3   1 -17  241.52    7.01
   3  -1  17  245.54    6.36
   3   1 -17  253.10    7.02
   3   1 -17  237.86    7.08
   3   1 -17  236.56    7.14
   3   1 -16  124.14    4.59
   3  -1  16  126.59    4.06
   3   1 -16  126.48    4.71
   3   1 -16  124.76    4.73
   3  -1  15   65.74    2.72
   3   1 -15   64.68    3.26
   3   1 -15   67.17    3.34
   3  -1  14   41.06    2.05
   3   1 -14   40.28    2.56
   3  -1  13  160.45    4.53
   3   1 -13  158.19    5.31
   3  -1  12  510.92   10.59
   3   1 -12  508.58   11.63
   3  -1  11  133.43    3.85
   3   1 -11  129.80    4.54
   3   1 -10   97.40    3.59
   3   1 -10  105.74    3.87
   3   1 -10   93.64    3.76
   3   1  -9   52.72    2.50
   3   1  -9   53.84    2.66
   3   1  -9   57.97    2.79
   3   1  -8  174.72    5.13
   3   1  -8  182.08    5.40
   3   1  -8  189.72    5.41
   3   1  -7   54.70    2.48
   3   1  -7   57.47    2.65
   3   1  -7   53.51    2.61
   3   1  -6   84.21    3.12
   3   1  -6   83.02    3.26
   3   1  -6   86.03    3.26
   3   1  -5   92.87    3.23
   3   1  -5   87.03    3.30
   3   1  -5   91.85    3.35
   3   1  -4   28.30    1.66
   3   1  -4   27.66    1.62
   3   1  -4   27.14    1.75
   3   1  -4   26.43    1.72
   3   1  -3   74.83    2.77
   3   1  -3   79.18    2.81
   3   1  -3   75.46    2.91
   3   1  -3   76.02    2.94
   3   1  -2  374.06    8.08
   3   1  -2  356.11    8.20
   3   1  -2  353.59    8.21
   3   1  -2  375.86    8.05
   3   1  -1    6.47    0.87
   3   1  -1    8.90    1.04
   3   1  -1    9.03    1.05
   3   1  -1    5.28    0.71
   3   1   0   24.06    1.51
   3   1   0   28.79    1.69
   3   1   0   27.32    1.63
   3   1   0   23.74    1.39
   3   1   1    4.27    0.74
   3   1   1    5.41    0.84
   3   1   1    4.26    0.74
   3   1   2  371.49    8.08
   3   1   2  356.70    8.13
   3  -1  -2  361.17    7.86
   3   1   2  372.39    8.11
   3   1   3   74.95    2.76
   3   1   3   75.00    2.81
   3   1   3   75.77    2.74
   3  -1  -3   70.45    2.62
   3   1   4   28.07    1.63
   3   1   4   26.92    1.64
   3   1   4   27.07    1.56
   3  -1  -4   25.65    1.53
   3   1   5   88.01    3.08
   3   1   5   84.17    3.06
   3  -1  -5   84.99    3.01
   3   1   5   91.06    3.04
   3   1   6   81.42    2.98
   3   1   6   83.97    2.86
   3  -1  -6   78.09    3.12
   3  -1  -6   80.17    2.94
   3   1   7   52.64    2.33
   3  -1  -7   50.60    2.50
   3   1   7   53.95    2.20
   3  -1  -7   49.91    2.28
   3   1   8  185.03    4.97
   3   1   8  183.85    4.75
   3  -1  -8  179.93    5.28
   3  -1  -8  176.19    5.00
   3   1   9   55.88    2.43
   3   1   9   54.98    2.38
   3   1   9   55.83    2.23
   3  -1  -9   54.12    2.63
   3  -1  -9   52.18    2.43
   3  -1 -10   99.06    3.54
   3   1  10   99.69    3.45
   3   1  10  100.18    3.37
   3  -1 -10   96.39    3.68
   3  -1 -10   94.57    3.47
   3  -1 -11  137.31    4.35
   3   1  11  139.61    4.31
   3  -1 -11  141.61    4.14
   3   1  11  134.20    4.12
   3  -1 -11  129.49    4.48
   3  -1 -12  490.54   10.92
   3   1  12  498.34   10.86
   3  -1 -12  508.30   10.68
   3  -1 -12  508.49   11.30
   3  -1 -13  160.16    4.98
   3   1  13  166.09    4.93
   3  -1 -13  173.30    4.89
   3  -1 -13  164.30    5.27
   3  -1 -14   40.52    2.31
   3   1  14   42.04    2.25
   3  -1 -14   43.64    2.23
   3  -1 -14   39.75    2.44
   3  -1 -15   64.28    2.98
   3   1  15   70.13    2.99
   3  -1 -15   70.33    2.92
   3  -1 -15   64.16    3.17
   3  -1 -16  121.64    4.35
   3   1  16  122.98    4.28
   3  -1 -16  127.51    4.24
   3  -1 -16  124.22    4.59
   3  -1 -17  233.69    6.74
   3   1  17  254.25    6.76
   3  -1 -17  255.67    6.73
   3  -1 -17  246.98    7.10
   3  -1 -18  168.41    5.44
   3   1  18  186.21    5.51
   3  -1 -18  173.72    5.36
   3  -1 -18  174.30    5.73
   3  -1 -19    6.42    1.17
   3   1  19    7.40    1.12
   3  -1 -19    6.37    1.23
   3  -1 -20   31.05    2.17
   3   1  20   27.23    2.00
   3  -1 -20   27.69    2.18
   3  -1 -21  390.38    9.86
   3  -1 -21  409.07   10.23
   3  -1 -22  241.67    6.96
   3   1  22  249.03    7.01
   3  -1 -22  241.17    7.23
   3  -1 -23  160.68    5.28
   3   1  23  152.49    5.19
   3  -1 -23  145.71    5.29
   3  -1 -24  198.90    6.11
   3  -1 -25   36.39    2.37
   3  -1 -26   46.37    2.59
   3  -1 -27   22.17    1.85
   3  -1 -28    4.15    0.97
   3  -1 -28    3.30    1.06
   3  -1 -29    2.51    0.86
   3   1  29    2.66    0.91
   3  -1 -29    3.03    1.03
   3  -1 -30   27.02    1.92
   3   1  30   28.30    1.94
   3  -1 -30   28.97    2.01
   3  -1 -31    1.99    0.74
   3   1  31    1.56    0.70
   3  -1 -31    1.37    0.86
   3   1  32   43.47    2.23
   3  -1 -32   42.56    2.27
   3   1  33   51.16    2.29
   3  -1 -33   54.76    2.45
   3  -1 -34   18.55    1.38
   3  -1 -35   25.92    1.49
   3  -1 -36    7.63    0.79
   3  -1 -37   12.95    0.89
   3  -1 -38   33.23    1.22
   3  -2  38    3.56    0.33
   3  -2  37    0.26    0.24
   3  -2  36    0.26    0.32
   3  -2  35    5.26    0.65
   3   2 -34   12.16    1.07
   3  -2  34   12.50    1.01
   3   2 -33    0.76    0.59
   3  -2  33    0.48    0.49
   3   2 -33    0.48    0.41
   3   2 -32   21.33    1.54
   3  -2  32   21.64    1.42
   3   2 -32   18.33    1.22
   3  -2  31   30.68    1.53
   3   2 -31   29.84    1.90
   3  -2  31   31.16    1.77
   3   2 -31   26.40    1.59
   3  -2  30   34.56    1.69
   3   2 -30   34.01    2.11
   3  -2  30   37.88    2.02
   3   2 -30   33.73    1.89
   3  -2  29   14.12    1.14
   3   2 -29   15.44    1.40
   3   2 -29   14.94    1.52
   3  -2  29   14.95    1.32
   3  -2  28   28.27    1.60
   3   2 -28   30.81    2.12
   3  -2  28   28.72    1.84
   3   2 -28   29.67    1.95
   3  -2  27   42.83    2.02
   3   2 -27   45.76    2.63
   3  -2  27   41.90    2.26
   3   2 -27   46.33    2.48
   3  -2  26   13.12    1.15
   3   2 -26   12.62    1.52
   3  -2  26   11.99    1.24
   3   2 -26   13.51    1.48
   3  -2  25   73.62    2.77
   3   2 -25   70.37    3.45
   3  -2  25   71.33    3.01
   3   2 -25   67.66    3.35
   3   2 -25   72.97    3.33
   3  -2  24   57.97    2.42
   3   2 -24   58.66    3.12
   3  -2  24   54.70    2.59
   3   2 -24   54.28    2.99
   3   2 -24   55.46    2.94
   3   2 -24   51.53    2.93
   3  -2  23   53.52    2.33
   3   2 -23   50.75    2.96
   3  -2  23   48.33    2.45
   3   2 -23   52.48    2.94
   3   2 -23   51.10    2.85
   3   2 -23   51.06    2.93
   3  -2  22   10.47    1.07
   3   2 -22    9.84    1.48
   3  -2  22   10.88    1.17
   3   2 -22    9.31    1.31
   3   2 -22   10.38    1.48
   3   2 -22    9.77    1.38
   3  -2  21   54.19    2.34
   3   2 -21   51.91    2.96
   3  -2  21   47.29    2.39
   3   2 -21   56.37    3.08
   3   2 -21   53.07    2.95
   3   2 -21   49.77    2.94
   3   2 -20  180.03    5.89
   3  -2  20  178.87    5.17
   3   2 -20  175.10    5.95
   3   2 -20  177.89    5.85
   3   2 -19   35.83    1.82
   3   2 -19   40.18    2.55
   3  -2  19   33.32    1.96
   3   2 -19   35.64    2.47
   3   2 -19   34.91    2.48
   3   2 -18  161.36    4.53
   3   2 -18  173.11    5.71
   3  -2  18  171.50    4.93
   3   2 -18  175.80    5.76
   3   2 -17    1.56    0.57
   3   2 -17    1.84    0.94
   3  -2  17    2.41    0.65
   3   2 -17    3.21    1.08
   3   2 -16  106.66    3.44
   3   2 -16  118.46    4.49
   3  -2  16  113.54    3.69
   3   2 -16  113.14    4.46
   3   2 -15   72.31    2.67
   3  -2  15   73.71    2.80
   3   2 -15   73.61    3.49
   3   2 -14   50.69    2.85
   3   2 -14   56.39    3.00
   3   2 -14   52.79    2.22
   3   2 -14   48.67    2.92
   3   2 -13   48.86    2.73
   3   2 -13   46.60    2.07
   3   2 -13   47.34    2.73
   3   2 -13   49.79    2.89
   3   2 -12   14.86    1.54
   3   2 -12   13.12    1.11
   3   2 -12   12.63    1.49
   3   2 -11  113.87    4.22
   3   2 -11  100.21    3.27
   3   2 -11  107.97    4.12
   3   2 -11  111.65    4.28
   3   2 -10  183.95    5.76
   3   2 -10  184.48    4.83
   3   2 -10  195.49    5.75
   3   2 -10  190.88    5.91
   3   2  -9  316.33    8.11
   3   2  -9  322.31    7.23
   3   2  -9  323.58    8.13
   3   2  -9  331.28    8.31
   3   2  -8  241.52    5.91
   3   2  -8  252.63    6.85
   3   2  -8  260.58    6.84
   3   2  -7  182.87    4.74
   3   2  -7  178.54    5.44
   3   2  -7  181.60    5.41
   3   2  -6  158.42    4.34
   3   2  -6  161.43    5.03
   3   2  -6  163.51    4.93
   3   2  -5    5.97    0.92
   3   2  -5    5.82    0.80
   3   2  -5    6.30    1.07
   3   2  -4   70.76    2.85
   3   2  -4   63.11    2.44
   3   2  -4   67.03    2.93
   3   2  -4   66.09    2.88
   3   2  -4   68.17    2.84
   3   2  -3   34.53    1.95
   3   2  -3   29.93    1.64
   3   2  -3   36.72    2.10
   3   2  -3   32.37    1.98
   3   2  -3   34.94    1.94
   3   2  -2  167.81    4.76
   3   2  -2  151.39    4.28
   3   2  -2  167.30    4.91
   3   2  -2  166.13    4.89
   3   2  -2  160.52    4.68
   3   2  -1   52.10    2.41
   3   2  -1   48.88    2.42
   3   2  -1   51.61    2.49
   3   2  -1   49.43    2.31
   3   2   0  533.12   11.25
   3   2   0  532.73   11.39
   3   2   0  537.61   11.49
   3   2   1   54.53    2.50
   3   2   1   55.08    2.55
   3   2   1   55.79    2.54
   3   2   2  165.80    4.78
   3   2   2  167.67    4.86
   3   2   2  157.73    4.75
   3   2   3   33.20    1.92
   3   2   3   33.86    1.97
   3   2   3   34.92    1.94
   3   2   4   67.97    2.82
   3   2   4   70.37    2.87
   3   2   4   66.44    2.74
   3   2   5    6.20    0.96
   3   2   5    7.20    0.96
   3   2   5    6.32    0.97
   3   2   6  156.43    4.84
   3   2   6  164.90    4.83
   3   2   6  162.09    4.70
   3   2   7  197.87    5.47
   3   2   7  184.56    5.19
   3   2   8  253.80    6.32
   3  -2  -8  244.40    6.44
   3   2   9  324.87    7.56
   3  -2  -9  311.46    7.74
   3   2  10  182.61    5.09
   3  -2 -10  181.77    5.36
   3   2  11  102.87    3.52
   3  -2 -11  100.66    3.79
   3   2  12   14.86    1.26
   3  -2 -12   14.58    1.46
   3   2  13   52.79    2.37
   3  -2 -13   46.41    2.56
   3   2  14   53.12    2.39
   3  -2 -14   51.71    2.72
   3  -2 -15   75.25    3.35
   3  -2 -16  109.27    4.18
   3  -2 -17    1.90    0.91
   3  -2 -18  167.29    5.10
   3  -2 -18  176.28    5.62
   3  -2 -19   35.16    2.10
   3  -2 -19   36.68    2.43
   3  -2 -20  172.47    5.28
   3  -2 -20  184.30    5.87
   3  -2 -21   50.18    2.56
   3   2  21   47.12    2.64
   3  -2 -21   52.08    2.86
   3  -2 -22    9.98    1.22
   3   2  22   10.78    1.36
   3  -2 -22   10.07    1.43
   3  -2 -23   48.28    2.52
   3   2  23   50.89    2.81
   3  -2 -23   50.19    2.85
   3  -2 -24   53.48    2.65
   3   2  24   52.85    2.82
   3  -2 -24   55.15    3.00
   3  -2 -25   75.76    3.46
   3  -2 -25   70.60    3.05
   3   2  25   66.94    3.25
   3  -2 -26   13.07    1.35
   3  -2 -26   12.95    1.54
   3  -2 -27   38.50    2.18
   3  -2 -27   45.17    2.59
   3  -2 -28   32.74    2.16
   3  -2 -29   14.55    1.49
   3  -2 -34   13.05    1.10
   3  -2 -35    5.65    0.73
   3  -2 -36    0.50    0.40
   3  -2 -37    0.49    0.32
   3  -3  35   28.17    1.00
   3  -3  34    3.65    0.43
   3  -3  33   16.56    0.95
   3  -3  32   14.76    0.90
   3   3 -32   15.97    1.11
   3  -3  32   14.80    0.96
   3  -3  31   10.46    0.85
   3   3 -31   11.32    1.05
   3  -3  31   11.20    0.91
   3  -3  30   30.53    1.48
   3   3 -30   30.48    1.74
   3  -3  30   29.59    1.52
   3  -3  29    7.48    0.80
   3   3 -29    7.26    0.98
   3  -3  29    6.89    0.82
   3  -3  28   63.93    2.39
   3   3 -28   66.71    2.83
   3  -3  28   59.92    2.40
   3   3 -28   60.19    2.38
   3  -3  27    8.27    0.92
   3   3 -27    7.76    1.16
   3  -3  27    7.92    0.91
   3   3 -27    6.74    0.92
   3  -3  26    7.86    0.93
   3   3 -26    7.20    1.11
   3  -3  26    7.58    0.90
   3   3 -26    7.75    1.04
   3  -3  25   60.24    2.46
   3   3 -25   57.93    2.88
   3  -3  25   55.74    2.41
   3   3 -25   56.56    2.64
   3  -3  24   76.49    2.83
   3   3 -24   72.19    3.33
   3  -3  24   69.91    2.78
   3   3 -24   70.31    3.07
   3  -3  23   12.72    1.17
   3   3 -23   12.23    1.47
   3  -3  23   12.93    1.16
   3   3 -23   12.86    1.43
   3  -3  22   14.63    1.24
   3   3 -22   13.05    1.54
   3  -3  22   13.60    1.19
   3   3 -22   12.78    1.47
   3   3 -22   11.81    1.46
   3  -3  21   39.67    2.01
   3   3 -21   38.40    2.45
   3  -3  21   36.75    1.94
   3   3 -21   37.09    2.34
   3   3 -21   32.97    2.38
   3  -3  20   17.33    1.34
   3   3 -20   16.45    1.34
   3   3 -20   15.20    1.66
   3  -3  20   16.31    1.28
   3   3 -20   16.69    1.70
   3   3 -20   16.58    1.73
   3  -3  19    8.08    0.98
   3   3 -19    7.39    0.96
   3   3 -19    8.29    1.33
   3   3 -19    8.77    1.35
   3   3 -19    7.83    1.28
   3  -3  18   16.59    1.33
   3   3 -18   14.85    1.29
   3   3 -18   16.68    1.70
   3   3 -18   14.11    1.62
   3   3 -18   14.61    1.67
   3   3 -17   97.66    4.29
   3  -3  17  109.01    3.51
   3   3 -17   93.31    3.37
   3   3 -17  100.46    4.14
   3   3 -17   91.21    3.93
   3   3 -17   96.58    4.28
   3   3 -16   59.23    3.25
   3  -3  16   61.17    2.50
   3   3 -16   53.18    2.44
   3   3 -16   54.08    3.02
   3   3 -16   54.80    2.98
   3   3 -16   55.63    3.15
   3   3 -15   45.52    2.82
   3   3 -15   42.19    2.13
   3   3 -15   42.22    2.61
   3   3 -15   39.24    2.69
   3   3 -14   26.95    2.20
   3   3 -14   24.96    1.65
   3   3 -14   28.35    2.16
   3   3 -14   21.96    2.03
   3   3 -13  198.33    6.46
   3   3 -13  197.44    5.35
   3   3 -13  210.33    6.26
   3   3 -13  193.12    6.41
   3   3 -12   69.52    3.53
   3   3 -12   71.44    2.84
   3   3 -12   72.28    3.36
   3  -3  11  189.42    4.84
   3   3 -11  183.46    5.14
   3   3 -11  194.08    5.89
   3  -3  10   54.27    2.20
   3   3 -10   51.97    2.42
   3   3 -10   58.77    2.97
   3   3 -10   53.71    2.96
   3  -3   9  259.59    6.05
   3   3  -9  247.73    6.36
   3   3  -9  264.70    7.13
   3   3  -9  263.55    7.36
   3  -3   8  585.83   11.62
   3   3  -8  572.45   11.98
   3   3  -8  602.90   12.86
   3   3  -8  569.02   12.93
   3   3  -8  594.98   13.08
   3  -3   7  146.26    4.07
   3   3  -7  141.74    4.34
   3   3  -7  153.95    4.98
   3   3  -7  153.05    5.10
   3   3  -7  147.32    5.03
   3  -3   6  208.69    5.24
   3   3  -6  211.69    6.24
   3   3  -6  205.90    5.54
   3   3  -6  220.37    6.18
   3   3  -6  213.66    6.22
   3  -3   5  115.43    3.48
   3   3  -5  111.23    3.72
   3   3  -5  119.02    4.25
   3   3  -5  109.69    4.18
   3   3  -5  115.25    4.20
   3  -3   4   66.80    2.51
   3   3  -4   65.03    2.68
   3   3  -4   68.74    3.09
   3   3  -4   64.77    3.07
   3   3  -4   62.89    2.98
   3   3  -3   67.09    2.95
   3  -3   3   62.87    2.44
   3   3  -3   60.31    2.59
   3   3  -3   64.59    2.99
   3   3  -3   66.45    3.09
   3   3  -2   14.82    1.43
   3  -3   2   14.15    1.14
   3   3  -2   13.59    1.27
   3   3  -2   13.22    1.47
   3   3  -2   16.27    1.58
   3   3  -1  295.75    7.48
   3   3  -1  293.77    7.11
   3   3  -1  315.60    7.83
   3   3   0  209.67    5.84
   3   3   0  202.83    5.50
   3   3   0  220.69    6.16
   3   3   1  273.43    7.13
   3   3   1  283.56    6.89
   3   3   2   12.54    1.24
   3   3   2   14.69    1.50
   3   3   2   13.78    1.39
   3   3   3   64.24    2.92
   3   3   3   65.27    2.96
   3   3   4   66.33    3.03
   3   3   4   71.54    3.07
   3   3   5  114.85    4.11
   3   3   5  113.97    4.06
   3   3   6  204.82    5.88
   3   3   7  152.08    4.82
   3   3   8  588.24   12.59
   3   3   9  248.21    6.67
   3   3  10   55.85    2.70
   3   3  11  191.64    5.57
   3  -3 -11  182.10    5.38
   3   3  12   69.95    3.05
   3  -3 -12   62.24    2.88
   3   3  13  200.93    5.75
   3  -3 -13  191.49    5.67
   3   3  14   24.58    1.77
   3  -3 -14   26.50    1.91
   3   3  15   39.91    2.25
   3  -3 -15   40.06    2.34
   3   3  16   54.00    2.63
   3  -3 -16   52.91    2.73
   3   3  17   96.48    3.59
   3  -3 -17   94.51    3.77
   3  -3 -18   14.38    1.49
   3  -3 -19    8.64    1.25
   3  -3 -20   16.64    1.59
   3  -3 -21   40.08    2.10
   3  -3 -21   34.91    2.29
   3  -3 -22   18.82    1.42
   3  -3 -22   13.57    1.43
   3  -3 -23   12.31    1.17
   3  -3 -23   11.50    1.36
   3  -3 -24   80.75    3.01
   3  -3 -24   72.24    3.24
   3  -3 -25   59.03    2.47
   3  -3 -25   55.00    2.75
   3  -3 -26    7.24    0.87
   3  -3 -26    6.78    1.12
   3  -3 -27    7.28    0.84
   3  -3 -27    7.96    1.13
   3  -3 -28   66.30    2.42
   3  -3 -28   62.33    2.76
   3  -3 -29    5.55    0.66
   3  -3 -29    6.17    1.00
   3  -3 -30   29.72    1.39
   3  -3 -30   31.55    1.77
   3  -3 -31   11.58    1.10
   3  -3 -32   15.18    1.12
   3  -3 -33   18.90    1.19
   3  -3 -34    3.36    0.56
   3  -4  32    4.25    0.35
   3  -4  31    1.61    0.32
   3  -4  30    6.24    0.57
   3  -4  29   18.40    0.99
   3   4 -29   13.91    0.88
   3  -4  28    1.33    0.43
   3   4 -28    1.32    0.46
   3  -4  27    0.65    0.42
   3   4 -27    0.95    0.48
   3  -4  26    2.44    0.57
   3   4 -26    1.71    0.58
   3  -4  25    1.68    0.55
   3   4 -25    2.23    0.68
   3  -4  24    7.30    0.85
   3   4 -24    7.00    0.97
   3  -4  23   12.59    1.09
   3   4 -23   12.04    1.23
   3  -4  22    1.79    0.60
   3   4 -22    2.25    0.81
   3   4 -22    0.93    0.62
   3  -4  21    9.15    1.02
   3   4 -21    9.80    1.25
   3   4 -21    8.12    1.05
   3  -4  20    7.01    0.91
   3   4 -20    7.45    0.96
   3   4 -20    7.54    1.17
   3   4 -20    6.62    1.02
   3  -4  19   13.93    1.23
   3   4 -19   13.29    1.26
   3   4 -19   13.67    1.47
   3   4 -19   12.13    1.35
   3   4 -18   22.22    1.59
   3   4 -18   27.01    1.97
   3   4 -18   24.19    1.84
   3   4 -17   26.17    2.17
   3  -4  17   33.02    1.84
   3   4 -17   26.18    1.75
   3   4 -17   28.40    2.06
   3   4 -17   25.81    1.91
   3   4 -17   27.79    2.14
   3   4 -16   68.69    3.53
   3  -4  16   79.46    2.92
   3   4 -16   64.87    2.84
   3   4 -16   72.87    3.32
   3   4 -16   67.50    3.16
   3   4 -16   70.18    3.50
   3   4 -15    3.08    0.94
   3  -4  15    3.66    0.72
   3   4 -15    3.69    0.84
   3   4 -15    4.19    1.02
   3   4 -15    2.72    0.91
   3   4 -15    2.48    0.91
   3   4 -14   28.58    2.26
   3  -4  14   30.99    1.76
   3   4 -14   26.37    1.75
   3   4 -14   30.24    2.17
   3   4 -14   27.05    2.03
   3   4 -14   24.57    2.09
   3   4 -13   11.02    1.49
   3  -4  13   11.81    1.14
   3   4 -13   11.14    1.21
   3   4 -13    9.66    1.37
   3   4 -13   12.07    1.50
   3   4 -12  106.04    4.51
   3  -4  12  114.87    3.64
   3   4 -12  102.74    3.67
   3   4 -12  103.11    4.07
   3   4 -12  103.87    4.33
   3  -4  11   11.59    1.10
   3  -4  11    9.59    0.98
   3   4 -11    8.96    1.16
   3   4 -11    9.36    1.30
   3   4 -11    9.08    1.35
   3   4 -11    9.42    1.35
   3   4 -10    8.05    1.28
   3  -4  10    6.50    0.88
   3  -4  10    6.37    0.85
   3   4 -10    4.95    0.94
   3   4 -10    6.13    1.11
   3   4 -10    5.32    1.12
   3  -4   9  101.35    3.31
   3  -4   9   91.30    3.15
   3   4  -9   92.73    3.44
   3   4  -9   91.22    3.78
   3   4  -9   94.03    4.01
   3   4  -9   92.51    4.06
   3  -4   8   89.44    3.11
   3   4  -8   91.77    3.42
   3   4  -8   96.44    3.80
   3   4  -8   85.43    3.83
   3   4  -8   92.33    4.00
   3  -4   7   92.78    3.19
   3   4  -7   90.37    3.40
   3   4  -7   95.75    3.82
   3   4  -7   89.62    3.90
   3   4  -7   92.66    4.01
   3  -4   6   28.23    1.68
   3   4  -6   29.55    1.89
   3   4  -6   31.58    2.17
   3   4  -6   29.50    2.18
   3  -4   5  154.12    4.42
   3   4  -5  148.31    4.62
   3   4  -5  154.47    5.06
   3   4  -5  144.95    5.14
   3  -4   4   92.73    3.24
   3   4  -4   91.75    3.43
   3   4  -4   93.33    3.80
   3   4  -4   90.06    3.85
   3  -4   3   68.06    2.74
   3   4  -3   67.79    2.89
   3   4  -3   63.29    3.17
   3   4  -3   71.17    3.22
   3  -4   2  562.09   11.56
   3   4  -2  532.05   11.68
   3   4  -2  538.50   12.51
   3  -4   1   49.90    2.37
   3   4  -1   50.23    2.49
   3   4  -1   56.48    2.91
   3   4  -1   54.31    2.87
   3   4   0  780.74   15.75
   3   4   0  757.96   15.71
   3   4   0  725.56   15.87
   3   4   1   53.35    2.76
   3   4   1   55.11    2.88
   3   4   1   53.51    2.82
   3   4   2  578.56   12.55
   3   4   2  587.57   12.68
   3   4   2  560.07   12.69
   3   4   3   68.90    3.08
   3   4   3   70.00    3.24
   3   4   3   66.42    3.16
   3   4   4   90.39    3.60
   3   4   4   87.50    3.65
   3   4   4   89.81    3.69
   3   4   5  145.21    4.72
   3   4   5  132.66    4.36
   3   4   5  146.97    4.91
   3   4   6   30.32    2.00
   3   4   6   28.26    1.87
   3   4   6   30.65    2.11
   3   4   7   91.78    3.66
   3   4   7   85.53    3.34
   3   4   7   95.54    3.80
   3   4   8   93.57    3.67
   3   4   8   83.75    3.26
   3   4   8   87.43    3.67
   3   4   9   90.12    3.61
   3   4   9   87.35    3.29
   3   4   9   92.94    3.75
   3   4  10    6.32    0.99
   3   4  10    6.24    1.03
   3   4  11    8.57    1.12
   3   4  11    9.22    1.20
   3   4  12  100.03    3.82
   3   4  12  103.58    3.98
   3   4  13    9.34    1.16
   3   4  13    9.58    1.20
   3   4  14   26.34    1.87
   3   4  14   27.06    1.91
   3   4  15    2.67    0.73
   3   4  15    3.30    0.80
   3  -4 -15    3.54    0.78
   3   4  16   62.26    2.97
   3   4  16   64.38    2.97
   3  -4 -16   67.94    2.82
   3   4  17   25.39    1.85
   3   4  17   27.40    1.87
   3  -4 -17   25.83    1.72
   3  -4 -18   24.30    1.68
   3  -4 -19   11.33    1.20
   3  -4 -20    5.85    0.91
   3  -4 -21    8.75    1.07
   3  -4 -22    2.27    0.73
   3  -4 -23   10.18    1.09
   3  -4 -24    5.31    0.85
   3  -4 -25    1.44    0.59
   3  -4 -26    2.05    0.63
   3  -4 -27    1.06    0.52
   3   4  28    1.07    0.51
   3  -4 -28    1.55    0.55
   3   4  29   15.25    0.94
   3   4  29   16.03    1.05
   3   4  30    5.84    0.53
   3   4  30    4.79    0.55
   3   4  31    1.33    0.27
   3  -5  28    7.63    0.47
   3  -5  27    4.25    0.42
   3  -5  26    1.20    0.32
   3  -5  25    2.20    0.41
   3  -5  24   12.71    0.85
   3  -5  23    2.52    0.51
   3  -5  22   29.57    1.42
   3  -5  21   23.28    1.31
   3  -5  20   64.52    2.32
   3  -5  19   15.86    1.15
   3  -5  18    0.66    0.51
   3   5 -18    0.78    0.62
   3  -5  17   54.57    2.20
   3   5 -17   50.33    2.29
   3  -5  16   23.86    1.45
   3   5 -16   22.29    1.57
   3   5 -16   20.91    1.48
   3   5 -16   19.25    1.44
   3  -5  15   40.29    1.91
   3   5 -15   42.57    2.13
   3   5 -15   38.99    2.06
   3   5 -15   36.31    2.01
   3  -5  14   24.61    1.50
   3   5 -14   22.74    1.65
   3   5 -14   22.80    1.61
   3   5 -14   20.91    1.59
   3  -5  13   67.80    2.54
   3   5 -13   62.26    2.70
   3   5 -13   59.57    2.69
   3   5 -13   59.04    2.71
   3  -5  12   54.05    2.26
   3   5 -12   49.31    2.41
   3   5 -12   48.22    2.43
   3   5 -12   49.77    2.50
   3  -5  11    9.25    0.97
   3   5 -11    8.64    1.12
   3   5 -11    9.67    1.18
   3   5 -11    8.90    1.22
   3  -5  10   65.95    2.56
   3   5 -10   66.46    2.83
   3   5 -10   63.56    2.91
   3  -5   9   11.03    1.04
   3  -5   9    9.61    0.98
   3   5  -9    9.58    1.19
   3   5  -9   10.71    1.30
   3   5  -9   10.00    1.36
   3  -5   8   71.29    2.65
   3  -5   8   65.10    2.60
   3   5  -8   66.58    3.03
   3   5  -8   65.91    3.24
   3   5  -8   68.23    3.39
   3  -5   7   32.18    1.73
   3  -5   7   31.25    1.78
   3   5  -7   31.74    2.12
   3   5  -7   31.52    2.20
   3   5  -7   33.80    2.34
   3  -5   6   22.48    1.43
   3  -5   6   20.42    1.46
   3   5  -6   19.28    1.68
   3   5  -6   21.26    1.83
   3   5  -6   21.40    1.86
   3  -5   5   23.22    1.46
   3  -5   5   21.42    1.51
   3   5  -5   23.46    1.83
   3   5  -5   22.42    1.88
   3   5  -5   21.58    1.88
   3   5  -4    2.02    0.76
   3  -5   4    2.47    0.61
   3  -5   4    1.84    0.63
   3   5  -4    2.34    0.88
   3   5  -4    2.08    0.76
   3   5  -3    3.72    0.89
   3  -5   3    3.39    0.68
   3  -5   3    3.41    0.73
   3   5  -3    4.93    0.96
   3   5  -3    4.72    0.99
   3   5  -3    3.70    0.88
   3  -5   2    0.40    0.50
   3  -5   2    1.42    0.64
   3   5  -2    1.05    0.74
   3   5  -2    0.52    0.76
   3   5  -2    0.67    0.66
   3  -5   1  116.34    3.55
   3  -5   1  114.31    3.86
   3   5  -1  112.52    3.89
   3   5  -1  118.84    4.27
   3   5  -1  119.09    4.54
   3  -5   0   32.26    1.69
   3  -5   0   32.35    1.89
   3   5   0   31.63    1.98
   3   5   0   32.48    2.16
   3  -5  -1  113.66    3.86
   3   5   1  110.10    3.87
   3   5   1  121.10    4.34
   3  -5  -2    0.28    0.58
   3   5   2    1.01    0.73
   3   5   2    1.27    0.89
   3  -5  -3    4.60    0.84
   3   5   3    4.43    0.94
   3   5   3    5.19    1.06
   3   5   3    3.27    0.88
   3   5   4    1.16    0.70
   3   5   4    2.35    0.89
   3   5   4    1.45    0.69
   3   5   5   20.66    1.54
   3   5   5   22.56    1.84
   3   5   5   21.74    1.81
   3   5   6   19.01    1.56
   3   5   6   17.45    1.46
   3   5   6   20.13    1.76
   3   5   6   20.04    1.73
   3   5   7   31.03    1.97
   3   5   7   29.49    1.83
   3   5   7   30.51    2.11
   3   5   7   29.54    2.07
   3   5   8   67.28    2.93
   3   5   8   63.27    2.76
   3   5   8   68.95    3.15
   3   5   8   65.19    3.12
   3   5   9    8.90    1.11
   3   5   9    9.13    1.31
   3   5   9    7.87    1.13
   3   5  10   62.91    2.71
   3   5  10   62.01    2.97
   3   5  11    9.49    1.10
   3   5  12   50.94    2.39
   3   5  13   58.74    2.61
   3   5  14   23.65    1.64
   3   5  15   38.29    2.04
   3   5  16   20.10    1.47
   3   5  17   50.29    2.30
   3   5  18    0.44    0.54
   3   5  19   15.80    1.27
   3   5  20   59.18    2.39
   3   5  21   22.79    1.41
   3   5  22   30.99    1.56
   3   5  23    3.03    0.60
   3   5  24   11.11    0.83
   3   5  24   12.85    1.11
   3   5  25    1.80    0.37
   3   5  25    1.69    0.57
   3   5  26    0.74    0.45
   3   5  27    5.55    0.64
   3   5  28    6.28    0.57
   3  -6  22    1.75    0.27
   3  -6  21   15.14    0.74
   3  -6  20   29.73    1.13
   3  -6  19    3.16    0.44
   3  -6  18   19.16    0.98
   3  -6  17   10.98    0.78
   3  -6  16   15.35    0.95
   3  -6  15   19.48    1.09
   3  -6  14   43.62    1.70
   3  -6  13   10.45    0.86
   3  -6  12    7.13    0.73
   3  -6  11   17.64    1.09
   3   6 -11   16.49    1.28
   3  -6  10   35.93    1.60
   3   6 -10   36.35    1.88
   3  -6   9   13.02    0.96
   3   6  -9   12.45    1.13
   3   6  -9   13.64    1.11
   3  -6   8    9.29    0.83
   3   6  -8    8.49    1.01
   3   6  -8    8.50    0.95
   3  -6   7    0.31    0.41
   3   6  -7   -0.03    0.55
   3   6  -7    0.29    0.54
   3  -6   6   14.65    1.03
   3  -6   6   15.90    1.21
   3   6  -6   15.15    1.29
   3   6  -6   12.87    1.18
   3  -6   5   11.69    0.94
   3  -6   5   11.43    1.04
   3   6  -5   11.84    1.15
   3   6  -5   11.35    1.14
   3  -6   4    3.24    0.57
   3  -6   4    3.69    0.71
   3   6  -4    2.63    0.71
   3   6  -4    2.74    0.76
   3  -6   3    8.26    0.82
   3  -6   3    7.92    0.91
   3   6  -3    7.66    0.97
   3   6  -3    8.80    1.05
   3  -6   2   46.54    1.88
   3  -6   2   49.75    2.16
   3   6  -2   45.18    2.13
   3   6  -2   44.57    2.22
   3  -6   1    8.06    0.81
   3  -6   1    8.51    0.99
   3   6  -1    8.21    0.98
   3   6  -1    7.84    1.03
   3  -6   0    4.60    0.64
   3  -6   0    3.93    0.75
   3   6   0    4.84    0.80
   3   6   0    6.05    0.98
   3  -6  -1    8.15    0.79
   3  -6  -1   10.45    1.06
   3   6   1    9.06    1.01
   3   6   1    9.93    1.14
   3  -6  -2   44.16    1.80
   3  -6  -2   46.29    2.16
   3   6   2   41.67    2.04
   3   6   2   46.58    2.29
   3  -6  -3    7.53    0.76
   3  -6  -3    7.91    0.94
   3   6   3    9.58    1.06
   3   6   3    9.41    1.12
   3  -6  -4    3.01    0.54
   3  -6  -4    3.06    0.73
   3   6   4    3.05    0.72
   3   6   4    3.71    0.85
   3  -6  -5   12.39    0.91
   3  -6  -5   13.20    1.16
   3   6   5   11.46    1.11
   3   6   5   12.71    1.30
   3  -6  -6   15.27    1.26
   3   6   6   14.68    1.21
   3   6   6   15.72    1.35
   3  -6  -7    0.20    0.52
   3   6   7    0.25    0.53
   3   6   7    0.27    0.58
   3  -6  -8    9.19    0.99
   3   6   8    8.62    0.95
   3   6   8    9.53    1.14
   3  -6  -9   13.26    1.17
   3   6   9   13.52    1.12
   3   6   9   14.88    1.34
   3  -6 -10   38.86    1.89
   3   6  10   36.06    1.79
   3   6  10   36.68    2.03
   3  -6 -11   18.53    1.32
   3   6  11   19.41    1.30
   3   6  11   17.20    1.43
   3  -6 -12    8.40    0.90
   3   6  12    8.99    0.91
   3   6  12    8.32    1.07
   3   6  13   10.03    0.94
   3   6  13   11.28    1.16
   3   6  14   45.14    1.87
   3   6  14   45.90    2.19
   3   6  15   17.07    1.09
   3   6  15   17.82    1.35
   3   6  16   14.06    0.95
   3   6  16   15.42    1.28
   3   6  17   10.46    0.78
   3   6  18   15.04    0.85
   3   6  21   14.78    1.05
   3   6  22    1.68    0.47
   3  -6 -23   22.18    0.93
   3   6  23   18.85    1.03
   3  -6 -24   26.38    0.92
   3   6  24   19.37    0.93
   3  -7  11   15.93    0.68
   3  -7  10   18.35    0.76
   3  -7   9    8.09    0.53
   3  -7   8    0.34    0.25
   3  -7   7   17.17    0.80
   3   7  -7   18.39    1.00
   3  -7   6   16.52    0.79
   3   7  -6   16.85    0.98
   3  -7   5    0.85    0.28
   3   7  -5    1.33    0.43
   3  -7   4    5.24    0.47
   3   7  -4    4.84    0.60
   3  -7   3    1.67    0.33
   3   7  -3    1.52    0.45
   3  -7   2   18.50    0.85
   3   7  -2   21.15    1.12
   3  -7   1   14.03    0.73
   3   7  -1   14.82    0.95
   3  -7   0   25.51    1.00
   3  -7   0   27.25    1.29
   3   7   0   29.11    1.31
   3  -7  -1   14.56    0.71
   3  -7  -1   13.95    0.93
   3   7   1   14.38    0.93
   3   7   1   11.55    0.79
   3  -7  -2   18.75    1.04
   3   7   2   17.45    1.00
   3  -7  -3    1.76    0.45
   3   7   3    2.01    0.45
   3   7   3    1.30    0.40
   3  -7  -4    5.73    0.63
   3   7   4    5.62    0.58
   3   7   4    5.36    0.61
   3  -7  -5    0.87    0.39
   3   7   5    1.67    0.40
   3   7   5    1.06    0.41
   3  -7  -6   16.16    0.95
   3   7   6   14.60    0.83
   3   7   6   13.77    0.91
   3  -7  -7   17.79    0.98
   3   7   7   16.07    0.83
   3   7   7   17.59    1.00
   3  -7  -8    0.19    0.32
   3   7   8    0.42    0.26
   3   7   8    0.08    0.39
   3  -7  -9   10.04    0.72
   3   7   9    8.34    0.71
   3  -7 -10   22.16    1.03
   3   7  10   17.92    1.01
   3  -7 -11   15.94    0.86
   3   7  11   14.81    0.90
   3   7  12   22.19    1.07
   3   7  13    4.44    0.52
   3   7  14    0.82    0.32
   3   7  15    2.65    0.38
   4   0   0   38.07    2.33
   4   0   1    1.37    0.80
   4   0  -1    0.89    0.80
   4   0   2   80.31    3.38
   4   0  -2   78.00    3.44
   4   0  -3    4.39    1.10
   4   0  -4  105.76    4.13
   4   0  -5    8.26    1.31
   4   0  -6    0.48    0.78
   4   0  -7   24.42    2.01
   4   0  -8    2.09    1.00
   4   0  -9   79.11    3.62
   4   0  -9   73.97    3.27
   4   0 -10   13.90    1.53
   4   0 -10   13.70    1.60
   4   0 -10   12.75    1.36
   4   0 -11   46.00    2.67
   4   0 -11   49.13    2.84
   4   0 -11   46.09    2.55
   4   0 -12   21.66    1.90
   4   0 -12   21.64    1.96
   4   0 -12   21.08    1.74
   4   0 -13   49.44    2.78
   4   0 -13   50.61    2.93
   4   0 -14   21.91    1.90
   4   0 -14   23.74    2.02
   4   0 -15   21.23    1.85
   4   0 -15   20.09    1.99
   4   0 -16    1.62    0.99
   4   0 -16    2.03    1.04
   4   0 -17  481.44   11.11
   4   0 -17  465.46   11.29
   4   0 -18   12.28    1.44
   4   0 -18   15.29    1.67
   4   0 -19    2.73    1.02
   4   0 -19    3.10    1.13
   4   0 -20   19.23    1.74
   4   0 -20   20.38    1.90
   4   0 -21  225.93    6.43
   4   0 -21  224.61    6.58
   4   0 -22   10.41    1.35
   4   0 -22    9.08    1.36
   4   0 -23    1.07    0.78
   4   0 -23    1.29    1.00
   4   0 -24   35.96    2.11
   4   0 -25   18.94    1.52
   4   0 -26   12.33    1.23
   4   0 -27   -0.10    0.56
   4   0 -28    9.36    1.00
   4   0 -28    9.95    1.15
   4   0 -29    0.11    0.47
   4   0 -29    0.64    0.63
   4   0 -30   35.80    1.66
   4   0 -30   36.97    1.74
   4   0 -31   45.11    1.79
   4   0 -32   20.24    1.06
   4   0 -33   11.18    0.68
   4   1 -32    8.03    0.60
   4   1 -31    6.09    0.72
   4   1 -31    4.99    0.60
   4   1 -30    0.49    0.47
   4   1 -30    0.12    0.48
   4   1 -29    0.06    0.48
   4   1 -29    0.36    0.51
   4   1 -28    2.75    0.71
   4   1 -28    3.81    0.78
   4   1 -27    3.81    0.83
   4   1 -27    3.84    0.87
   4   1 -26    9.73    1.17
   4   1 -26    9.28    1.16
   4   1 -25   11.53    1.30
   4   1 -25   10.34    1.29
   4   1 -24    2.66    0.89
   4   1 -24    2.00    0.82
   4   1 -23   37.49    2.31
   4   1 -23   39.41    2.34
   4   1 -22   15.12    1.60
   4   1 -22   15.58    1.65
   4   1 -21   15.96    1.68
   4   1 -20   53.54    2.91
   4   1 -19   86.45    3.81
   4   1 -18   93.14    3.97
   4   1 -17   48.94    2.84
   4   1 -17   45.85    2.81
   4   1 -16  194.23    6.15
   4   1 -16  194.23    6.20
   4   1 -15   25.01    2.10
   4   1 -15   21.07    2.02
   4   1 -15   22.59    1.92
   4   1 -14  103.29    4.21
   4   1 -14  100.32    4.26
   4   1 -14   96.92    4.06
   4   1 -13   70.11    3.50
   4   1 -13   70.02    3.50
   4   1 -13   69.11    3.36
   4   1 -12   32.38    2.49
   4   1 -12   31.28    2.26
   4   1 -11   31.96    2.38
   4   1 -11   25.12    2.04
   4   1 -10   11.84    1.65
   4   1 -10   13.45    1.53
   4   1  -9    3.95    1.18
   4   1  -9    3.44    0.94
   4   1  -8   11.77    1.58
   4   1  -8    9.63    1.32
   4   1  -7   33.63    2.44
   4   1  -7   37.85    2.42
   4   1  -6   28.99    2.23
   4   1  -6   30.22    2.18
   4   1  -5   16.67    1.74
   4   1  -5   15.64    1.58
   4   1  -4   28.01    2.10
   4   1  -4   28.47    2.08
   4   1  -3   97.56    3.96
   4   1  -3   88.84    3.75
   4   1  -2   66.80    3.24
   4   1  -1  134.60    4.73
   4   1   0   78.36    3.48
   4   1   1  126.64    3.83
   4   1   1  135.74    4.68
   4   1   2   70.47    2.93
   4   1   2   65.72    2.57
   4   1   2   64.49    3.09
   4   1   3   91.44    3.40
   4   1   3   90.81    3.68
   4   1   4   29.42    1.81
   4   1   4   32.82    2.12
   4  -1  -4   28.26    1.98
   4   1   5   18.36    1.44
   4   1   5   16.61    1.54
   4  -1  -5   15.93    1.55
   4   1   6   30.59    1.85
   4   1   6   27.61    1.93
   4  -1  -6   26.20    1.98
   4   1   7   35.02    2.01
   4   1   7   35.74    2.15
   4  -1  -7   35.02    2.25
   4   1   8   10.72    1.14
   4  -1  -8   10.10    1.18
   4   1   8    9.85    1.20
   4  -1  -8    9.55    1.30
   4   1   9    3.90    0.76
   4  -1  -9    4.15    0.86
   4   1   9    4.52    0.90
   4  -1  -9    3.88    0.99
   4   1  10   12.77    1.24
   4  -1 -10   13.83    1.39
   4  -1 -10   12.52    1.47
   4   1  11   28.13    1.82
   4  -1 -11   25.50    1.84
   4  -1 -11   29.06    2.14
   4   1  12   30.21    1.88
   4  -1 -12   30.45    2.02
   4  -1 -12   29.64    2.19
   4   1  13   63.01    2.80
   4  -1 -13   64.63    2.96
   4  -1 -13   69.39    3.26
   4   1  14   93.77    3.52
   4  -1 -14   99.23    3.74
   4  -1 -14  100.33    4.07
   4   1  15   20.28    1.55
   4  -1 -15   22.62    1.76
   4  -1 -15   24.17    1.98
   4   1  16  175.39    5.24
   4  -1 -16  183.15    5.46
   4  -1 -16  191.54    5.88
   4  -1 -17   49.02    2.55
   4  -1 -17   51.27    2.83
   4  -1 -18   90.91    3.55
   4  -1 -18   94.71    3.84
   4  -1 -19   83.79    3.34
   4  -1 -19   86.25    3.66
   4  -1 -20   52.94    2.57
   4  -1 -20   52.74    2.83
   4  -1 -21   16.41    1.44
   4  -1 -21   14.90    1.60
   4  -1 -22   14.04    1.32
   4  -1 -22   14.96    1.54
   4  -1 -23   36.45    2.00
   4  -1 -23   35.15    2.16
   4  -1 -24    2.47    0.72
   4  -1 -24    2.63    0.91
   4  -1 -25    8.71    0.98
   4  -1 -25   10.59    1.25
   4  -1 -26    7.29    0.89
   4  -1 -26    8.42    1.12
   4  -1 -27    3.89    0.68
   4  -1 -27    3.22    0.81
   4  -1 -28    2.63    0.72
   4  -1 -29    0.51    0.51
   4   2 -31    5.20    0.55
   4   2 -30    8.08    0.74
   4   2 -30    6.90    0.58
   4   2 -29    3.05    0.60
   4   2 -29    3.32    0.55
   4   2 -28    0.93    0.55
   4   2 -28    1.38    0.55
   4   2 -27   21.06    1.43
   4   2 -27   20.95    1.36
   4   2 -26   14.90    1.31
   4   2 -26   16.30    1.27
   4   2 -25   15.92    1.41
   4   2 -24    8.83    1.19
   4   2 -23    7.20    1.10
   4   2 -22   23.26    1.79
   4   2 -21   33.96    2.23
   4   2 -20    6.20    1.27
   4   2 -19    4.24    1.10
   4   2 -18    4.84    1.19
   4   2 -17   25.12    2.14
   4   2 -16   33.06    2.40
   4   2 -15   29.59    2.27
   4   2 -14   19.22    2.00
   4   2 -14   19.89    1.85
   4   2 -13    7.83    1.45
   4   2 -13    6.23    1.17
   4   2 -12    8.17    1.27
   4   2 -11    9.53    1.37
   4   2 -10   21.84    2.07
   4   2 -10   23.84    2.03
   4   2  -9    4.68    0.74
   4   2  -9    4.64    1.20
   4   2  -9    5.74    1.12
   4   2  -8   70.93    2.65
   4   2  -8   76.91    3.65
   4   2  -8   73.34    3.56
   4   2  -7   12.28    1.10
   4   2  -7   13.96    1.65
   4   2  -7   13.53    1.56
   4   2  -6    4.36    0.75
   4   2  -6    4.25    1.18
   4   2  -6    2.48    0.86
   4   2  -5  111.31    3.56
   4   2  -5  116.15    4.50
   4   2  -5  110.04    4.43
   4   2  -4  133.45    4.03
   4   2  -4  142.05    4.99
   4   2  -4  131.50    4.91
   4   2  -3   40.83    2.04
   4   2  -3   40.81    2.55
   4   2  -3   36.92    2.43
   4   2  -2   62.96    2.61
   4   2  -2   65.47    3.22
   4   2  -2   61.53    3.11
   4   2  -1    4.17    0.84
   4   2  -1    4.59    1.00
   4   2   0    2.85    0.75
   4   2   0    3.23    1.00
   4   2   0    2.10    0.80
   4   2   1    4.48    0.85
   4   2   1    4.57    1.09
   4   2   1    3.65    0.91
   4   2   2   67.36    2.99
   4   2   2   61.18    2.64
   4   2   2   64.30    3.10
   4   2   2   59.30    2.95
   4   2   3   38.86    2.25
   4   2   3   36.70    2.02
   4   2   3   40.26    2.44
   4   2   4  139.20    4.53
   4   2   4  128.67    4.18
   4   2   4  137.84    4.76
   4   2   5  117.43    4.08
   4   2   5  110.11    3.73
   4   2   5  108.80    4.17
   4   2   6    3.99    0.82
   4   2   6    3.06    0.91
   4   2   7   13.73    1.34
   4   2   7   15.28    1.52
   4   2   8   77.57    3.26
   4   2   8   79.49    3.40
   4   2   9    4.70    0.86
   4   2   9    5.88    1.04
   4  -2  -9    5.43    1.00
   4   2  10   21.94    1.68
   4   2  10   24.97    1.84
   4  -2 -10   23.82    1.75
   4   2  11   10.28    1.19
   4   2  11   11.97    1.34
   4  -2 -11   10.90    1.29
   4   2  12   10.00    1.16
   4   2  12    9.12    1.20
   4  -2 -12    8.56    1.22
   4   2  13    6.41    0.95
   4   2  13    8.00    1.11
   4  -2 -13    7.10    1.15
   4   2  14   19.79    1.58
   4   2  14   20.14    1.58
   4  -2 -14   22.70    1.76
   4   2  15   29.59    1.86
   4  -2 -15   30.93    2.07
   4   2  16   34.15    1.95
   4  -2 -16   34.84    2.17
   4   2  17   24.10    1.58
   4  -2 -17   22.20    1.75
   4  -2 -18    4.31    0.99
   4  -2 -19    5.21    1.04
   4  -2 -20    6.03    1.07
   4  -2 -21   35.00    2.09
   4  -2 -22   22.56    1.65
   4  -2 -23    6.67    1.00
   4  -2 -24    8.57    1.03
   4  -2 -25   17.43    1.33
   4  -2 -26   17.38    1.28
   4  -2 -27   21.66    1.33
   4  -2 -28    1.10    0.50
   4  -2 -29    2.83    0.53
   4  -2 -30    9.36    0.76
   4  -2 -31    5.37    0.52
   4   2  32    1.46    0.25
   4  -2 -32    2.01    0.30
   4   3 -29    4.14    0.44
   4   3 -28    2.92    0.46
   4   3 -27    7.43    0.72
   4   3 -27    6.31    0.55
   4   3 -26    5.77    0.75
   4   3 -26    5.43    0.61
   4   3 -25   14.75    1.12
   4   3 -25   15.01    1.05
   4   3 -24    6.42    0.86
   4   3 -24    6.76    0.84
   4   3 -23    3.72    0.79
   4   3 -23    2.32    0.69
   4   3 -22   21.28    1.55
   4   3 -22   18.72    1.45
   4   3 -21    4.89    0.93
   4   3 -21    4.83    0.95
   4   3 -20    5.15    0.99
   4   3 -20    4.11    1.01
   4   3 -19   10.06    1.29
   4   3 -19   10.80    1.34
   4   3 -18    4.70    1.07
   4   3 -18    4.80    1.08
   4   3 -17   18.03    1.15
   4   3 -17   21.12    1.81
   4   3 -17   21.24    1.79
   4   3 -16    1.19    0.50
   4   3 -16    0.87    0.80
   4   3 -16    1.31    0.96
   4   3 -15   30.19    1.57
   4   3 -15   31.41    2.19
   4   3 -15   33.25    2.28
   4   3 -14   86.95    3.63
   4   3 -14   91.19    3.83
   4   3 -13   18.19    1.28
   4   3 -13   19.50    1.81
   4   3 -13   19.58    1.86
   4   3 -12   32.09    1.72
   4   3 -12   38.26    2.49
   4   3 -11   14.24    1.20
   4   3 -11   15.42    1.77
   4   3 -10   96.07    3.22
   4   3 -10   96.89    4.10
   4   3  -9   14.32    1.23
   4   3  -9   16.38    1.85
   4   3  -8   58.24    2.45
   4   3  -8   59.22    3.15
   4   3  -7   26.40    1.65
   4   3  -7   24.41    2.02
   4   3  -6   32.26    1.85
   4   3  -6   32.20    2.30
   4   3  -5   59.40    2.55
   4   3  -5   61.53    3.17
   4   3  -4   67.81    2.79
   4   3  -4   71.48    3.40
   4   3  -4   65.56    3.29
   4   3  -3   39.62    2.08
   4   3  -3   40.43    2.51
   4   3  -3   38.39    2.47
   4   3  -2   68.80    2.84
   4   3  -2   68.41    3.27
   4   3  -2   67.57    3.30
   4   3  -1   26.12    1.74
   4   3  -1   24.26    1.98
   4   3  -1   25.02    1.97
   4   3   0    0.70    0.64
   4   3   0    2.23    1.01
   4   3   0    0.54    0.61
   4   3   1   25.58    1.72
   4   3   1   26.75    2.02
   4   3   1   21.68    1.80
   4   3   2   63.28    2.76
   4   3   2   66.37    3.15
   4   3   2   63.69    3.10
   4   3   3   40.73    2.37
   4   3   3   39.69    2.18
   4   3   3   36.56    2.36
   4   3   3   39.21    2.37
   4   3   4   74.69    3.27
   4   3   4   71.58    2.96
   4   3   4   69.90    3.30
   4   3   4   64.55    3.09
   4   3   5   60.34    2.90
   4   3   5   60.18    2.72
   4   3   5   63.27    3.01
   4   3   6   35.54    2.17
   4   3   6   32.90    1.98
   4   3   6   34.66    2.27
   4   3   7   25.05    1.82
   4   3   7   24.75    1.75
   4   3   7   26.63    2.02
   4   3   8   64.67    2.96
   4   3   8   63.02    2.80
   4   3   8   63.88    3.05
   4   3   9   12.60    1.35
   4   3   9   13.53    1.43
   4   3  10   92.87    3.43
   4   3  10   92.39    3.66
   4   3  11   16.63    1.57
   4   3  12   34.08    2.13
   4   3  13   17.20    1.55
   4   3  14   83.14    3.32
   4   3  15   31.00    1.92
   4  -3 -15   30.43    1.74
   4   3  16    1.17    0.69
   4  -3 -16    1.21    0.57
   4   3  17   22.43    1.57
   4  -3 -17   19.90    1.41
   4   3  18    4.84    0.82
   4  -3 -18    5.58    0.81
   4   3  19    9.14    1.01
   4  -3 -19   10.93    1.05
   4   3  20    5.27    0.78
   4  -3 -20    5.42    0.79
   4   3  21    3.75    0.66
   4  -3 -21    5.32    0.78
   4  -3 -22   19.74    1.27
   4  -3 -23    3.29    0.63
   4  -3 -24    6.20    0.74
   4  -3 -25   13.88    0.96
   4  -3 -26    5.41    0.61
   4   3  27    6.97    0.67
   4  -3 -27    8.12    0.65
   4   3  28    3.11    0.46
   4  -3 -28    2.85    0.39
   4   3  29    4.13    0.43
   4   4 -24    4.40    0.47
   4   4 -23    0.88    0.36
   4   4 -22    0.37    0.40
   4   4 -22    0.32    0.34
   4   4 -21   18.24    1.17
   4   4 -21   14.94    1.02
   4   4 -20    6.40    0.81
   4   4 -20    6.12    0.79
   4   4 -19    4.70    0.82
   4   4 -19    4.88    0.79
   4   4 -18    5.38    0.85
   4   4 -18    5.25    0.86
   4   4 -17    8.33    1.06
   4   4 -17    7.87    1.05
   4   4 -16    6.47    0.75
   4   4 -16    6.90    1.03
   4   4 -16    5.75    1.00
   4   4 -15   46.88    1.94
   4   4 -15   50.26    2.38
   4   4 -15   51.89    2.51
   4   4 -14   48.58    2.02
   4   4 -14   49.48    2.43
   4   4 -14   48.11    2.49
   4   4 -13    9.58    0.95
   4   4 -13   10.55    1.27
   4   4 -13   11.31    1.34
   4   4 -12    4.36    0.73
   4   4 -12    5.02    1.00
   4   4 -12    4.15    1.08
   4   4 -11   16.84    1.25
   4   4 -11   15.48    1.50
   4   4 -11   16.10    1.61
   4   4 -10    0.92    0.54
   4   4 -10    1.77    0.95
   4   4  -9   31.43    1.74
   4   4  -9   31.66    2.21
   4   4  -8   19.58    1.41
   4   4  -8   19.94    1.80
   4   4  -7    2.40    0.72
   4   4  -7    3.00    1.04
   4   4  -6   23.73    1.58
   4   4  -6   26.02    2.02
   4   4  -5   45.16    2.17
   4   4  -5   45.31    2.62
   4   4  -4  139.12    4.15
   4   4  -4  134.62    4.76
   4   4  -3    6.24    1.00
   4   4  -3    6.26    1.29
   4   4  -2   60.77    2.59
   4   4  -1    9.23    1.15
   4   4   0   74.20    2.91
   4  -4  -1    8.06    0.82
   4   4   1    8.96    1.10
   4  -4  -2   60.86    2.22
   4   4   2   62.71    2.63
   4  -4  -3    5.14    0.71
   4   4   3    5.67    0.93
   4   4   3    4.39    1.09
   4  -4  -4  141.91    3.80
   4   4   4  133.96    4.23
   4   4   4  136.69    4.61
   4  -4  -5   47.01    1.94
   4   4   5   45.50    2.27
   4   4   5   43.85    2.51
   4  -4  -6   24.50    1.37
   4   4   6   24.39    1.63
   4   4   6   24.06    1.87
   4  -4  -7    2.89    0.60
   4   4   7    2.97    0.81
   4   4   7    2.69    0.88
   4  -4  -8   18.93    1.21
   4   4   8   17.36    1.42
   4   4   8   17.60    1.61
   4  -4  -9   31.41    1.56
   4   4   9   29.94    1.81
   4   4   9   31.76    2.06
   4  -4 -10    1.29    0.46
   4   4  10    1.30    0.75
   4   4  10    1.32    0.76
   4  -4 -11   17.26    1.13
   4   4  11   16.21    1.49
   4  -4 -12    4.28    0.63
   4   4  12    4.04    0.87
   4   4  13   10.57    1.22
   4   4  14   45.61    2.28
   4   4  15   46.51    2.23
   4   4  16    6.54    0.94
   4   4  16    7.27    0.94
   4   4  17    7.06    0.90
   4   4  17    8.39    0.97
   4   4  18    4.83    0.80
   4   4  18    5.12    0.80
   4   4  19    4.30    0.75
   4   4  19    4.96    0.75
   4   4  20    7.03    0.85
   4   4  20    6.65    0.77
   4   4  21   17.42    1.14
   4   4  21   14.89    1.03
   4   4  22   -0.02    0.42
   4   4  22    0.22    0.34
   4   4  23    0.46    0.40
   4   4  23    0.40    0.30
   4   4  24    5.01    0.57
   4   4  25    5.70    0.51
   4   4  26    5.94    0.44
   4   5 -16   10.17    0.69
   4   5 -16   11.16    0.78
   4   5 -15    2.80    0.48
   4   5 -15    3.08    0.55
   4   5 -14    1.34    0.45
   4   5 -14    1.29    0.42
   4   5 -14    0.91    0.49
   4   5 -13    9.33    0.80
   4   5 -13    6.90    0.75
   4   5 -13    7.90    0.88
   4   5 -12   17.20    1.10
   4   5 -12   15.95    1.09
   4   5 -12   16.57    1.25
   4   5 -11   11.62    0.94
   4   5 -11   10.49    0.95
   4   5 -11   11.67    1.13
   4   5 -10    1.23    0.53
   4   5 -10    1.43    0.56
   4   5 -10    1.68    0.71
   4   5  -9    1.55    0.53
   4   5  -9    1.04    0.57
   4   5  -9    1.86    0.78
   4   5  -8   29.47    1.52
   4   5  -8   30.32    1.66
   4   5  -8   29.42    1.79
   4   5  -7    1.79    0.61
   4   5  -7    1.78    0.67
   4   5  -7    1.36    0.71
   4   5  -6   27.34    1.50
   4   5  -6   28.20    1.81
   4   5  -5   16.37    1.19
   4   5  -5   16.80    1.46
   4   5  -4    2.84    0.66
   4   5  -4    2.62    0.85
   4   5  -3    2.14    0.63
   4   5  -3    2.13    0.79
   4   5  -2    7.95    0.92
   4   5  -2    7.73    1.12
   4  -5   1   19.61    1.08
   4   5  -1   19.32    1.32
   4   5  -1   18.45    1.58
   4  -5   0    4.60    0.58
   4   5   0    4.55    0.75
   4   5   0    4.52    0.95
   4  -5  -1   19.96    1.10
   4   5   1   19.81    1.33
   4   5   1   19.23    1.53
   4  -5  -2    7.86    0.72
   4   5   2    6.50    0.85
   4   5   2    8.42    1.13
   4  -5  -3    2.24    0.47
   4   5   3    2.38    0.83
   4  -5  -4    2.38    0.47
   4   5   4    2.43    0.86
   4  -5  -5   16.25    0.99
   4  -5  -6   28.34    1.31
   4  -5  -7    1.57    0.44
   4  -5  -8   30.66    1.35
   4   5   8   26.42    1.52
   4  -5  -9    1.36    0.39
   4   5   9    1.45    0.58
   4   5   9    0.99    0.68
   4  -5 -10    1.85    0.43
   4   5  10    1.66    0.58
   4   5  10    1.79    0.68
   4  -5 -11   11.46    0.80
   4   5  11   11.95    1.00
   4   5  11   10.49    1.12
   4  -5 -12   17.04    0.95
   4   5  12   17.39    1.17
   4   5  12   16.66    1.27
   4  -5 -13    9.31    0.69
   4   5  13    9.09    0.87
   4   5  13    9.16    0.99
   4  -5 -14    1.60    0.36
   4   5  14    1.29    0.50
   4   5  14    0.97    0.56
   4  -5 -15    4.60    0.47
   4   5  15    3.94    0.63
   4   5  15    4.02    0.70
   4  -5 -16   14.36    0.74
   4   5  16   14.85    0.99
   4   5  16   13.09    1.01
   4  -5 -17   22.81    0.89
   4   5  17   21.85    1.14
   4   5  17   20.22    1.20
   4  -5 -18    1.32    0.24
   4   5  18    1.66    0.44
   4   5  18    1.62    0.49
   4   5  19    0.34    0.30
   4   5  19    0.52    0.35
   4   5  20    0.20    0.26
   4   5  20    0.11    0.27
   4   6  -9   19.42    0.91
   4   6  -8    3.75    0.49
   4   6  -7    5.81    0.57
   4   6  -7    3.82    0.45
   4   6  -6    6.82    0.62
   4   6  -6    5.46    0.57
   4   6  -5   13.84    0.88
   4   6  -4    3.35    0.55
   4   6  -3   11.71    0.89
   4   6  -2    8.91    0.81
   4   6  -1    1.04    0.49
   4   6   0   18.23    1.02
   4   6   0   17.72    1.12
   4   6   1    1.76    0.44
   4   6   1    1.19    0.55
   4   6   2    9.40    0.72
   4   6   2    8.29    0.82
   4   6   3   12.43    0.83
   4   6   3   13.70    1.01
   4   6   4    3.24    0.50
   4   6   4    4.26    0.67
   4   6   5   15.44    0.89
   4   6   5   16.31    1.08
   4   6   6    6.33    0.60
   4   6   6    6.67    0.73
   4  -6  -7    4.85    0.38
   4   6   7    5.67    0.56
   4   6   7    5.98    0.69
   4  -6  -8    2.80    0.30
   4   6   8    3.64    0.47
   4   6   8    3.22    0.56
   4   6   9   19.21    0.91
   4   6   9   19.78    1.09
   4   6  10   11.71    0.69
   4   6  10   10.96    0.81
   4   6  11   33.88    1.16
   4   6  12   13.95    0.66
   5   0   0    0.89    0.57
   5   0  -1    0.63    0.57
   5   0  -2    0.80    0.58
   5   0  -3   29.80    1.72
   5   0  -3   30.96    1.79
   5   0  -4   11.19    1.12
   5   0  -4   10.81    1.15
   5   0  -5   24.62    1.57
   5   0  -5   24.61    1.65
   5   0  -6   37.92    1.95
   5   0  -6   41.46    2.12
   5   0  -7   17.88    1.36
   5   0  -7   21.12    1.55
   5   0  -8   34.12    1.83
   5   0  -8   34.61    1.94
   5   0  -9    1.31    0.64
   5   0  -9    0.77    0.69
   5   0 -10    4.36    0.80
   5   0 -10    5.12    0.92
   5   0 -11   10.68    1.06
   5   0 -11   10.57    1.15
   5   0 -12    4.55    0.79
   5   0 -12    5.73    0.92
   5   0 -13   69.58    2.55
   5   0 -13   74.37    2.82
   5   0 -14   33.03    1.67
   5   0 -14   35.28    1.87
   5   0 -15   70.49    2.46
   5   0 -15   72.48    2.70
   5   0 -16    2.66    0.58
   5   0 -16    3.38    0.76
   5   0 -17    2.17    0.52
   5   0 -17    2.75    0.70
   5   0 -18    0.46    0.38
   5   0 -18    0.38    0.51
   5   0 -19   13.63    0.87
   5   0 -19   15.08    1.10
   5   0 -20    3.74    0.48
   5   0 -20    4.65    0.70
   5   0 -21    7.70    0.56
   5   0 -21   10.34    0.85
   5   0 -22    0.44    0.40
   5   0 -23    2.15    0.41
   5   0 -24    2.77    0.49
   5   1 -23    0.29    0.21
   5   1 -23    0.48    0.30
   5   1 -22    6.05    0.54
   5   1 -22    6.95    0.67
   5   1 -21    4.93    0.56
   5   1 -21    5.85    0.68
   5   1 -20    2.54    0.51
   5   1 -20    2.72    0.58
   5   1 -19   12.72    0.95
   5   1 -19   13.47    1.06
   5   1 -18    2.73    0.61
   5   1 -18    2.81    0.70
   5   1 -17   48.16    1.99
   5   1 -17   47.79    2.11
   5   1 -16   22.65    1.42
   5   1 -16   24.16    1.53
   5   1 -15    5.65    0.85
   5   1 -15    6.76    0.98
   5   1 -14    2.90    0.78
   5   1 -14    2.54    0.83
   5   1 -13    2.09    0.71
   5   1 -13    1.86    0.75
   5   1 -12   39.85    2.04
   5   1 -12   37.81    2.08
   5   1 -11    3.36    0.81
   5   1 -11    4.39    0.94
   5   1 -10    3.45    0.84
   5   1 -10    4.88    0.98
   5   1  -9   22.42    1.62
   5   1  -9   22.82    1.67
   5   1  -8    6.74    1.03
   5   1  -8    6.39    1.07
   5   1  -7    8.82    1.14
   5   1  -7   10.57    1.25
   5   1  -6   12.98    1.29
   5   1  -6   11.65    1.29
   5   1  -5   44.25    2.30
   5   1  -5   40.88    2.25
   5   1  -4    2.40    0.88
   5   1  -3   21.99    1.66
   5   1  -2   19.29    1.55
   5   1  -1   10.55    1.21
   5   1   0    0.77    0.68
   5   1   1   11.96    1.24
   5   1   2   17.87    1.44
   5   1   3   19.72    1.46
   5  -1 -10    4.33    0.71
   5  -1 -11    3.69    0.70
   5   1  12   33.93    1.41
   5  -1 -12   39.63    1.80
   5   1  13    2.11    0.45
   5  -1 -13    2.33    0.61
   5   1  14    2.34    0.44
   5  -1 -14    2.77    0.62
   5   1  15    6.72    0.62
   5  -1 -15    6.75    0.79
   5   1  16   20.82    1.02
   5  -1 -16   23.49    1.31
   5   1  17   41.60    1.45
   5  -1 -17   45.24    1.80
   5   1  18    2.07    0.38
   5  -1 -18    2.16    0.54
   5   1  19   10.40    0.64
   5  -1 -19   13.03    0.89
   5   1  20    1.63    0.29
   5  -1 -20    2.45    0.47
   5   1  21    3.42    0.33
   5  -1 -21    5.72    0.53
   5  -1 -22    6.14    0.49
   5   2 -22    0.38    0.22
   5   2 -22    0.29    0.25
   5   2 -21    2.32    0.39
   5   2 -21    2.46    0.44
   5   2 -20   20.52    1.06
   5   2 -19    4.60    0.61
   5   2 -18   14.21    1.01
   5   2 -17   13.15    1.05
   5   2 -17   12.98    1.08
   5   2 -16    5.28    0.77
   5   2 -16    6.33    0.87
   5   2 -15    1.15    0.58
   5   2 -15    1.80    0.70
   5   2 -14   17.77    1.33
   5   2 -14   20.23    1.44
   5   2 -13   17.69    1.35
   5   2 -13   17.94    1.39
   5   2 -12    8.21    1.02
   5   2 -12    7.23    1.01
   5   2 -11    0.89    0.69
   5   2 -11    1.66    0.77
   5   2 -10   51.15    2.35
   5   2 -10   48.35    2.33
   5   2  -9   22.70    1.59
   5   2  -9   20.78    1.58
   5   2  -8   43.66    2.22
   5   2  -8   43.34    2.27
   5   2  -7   41.95    2.18
   5   2  -7   38.03    2.15
   5   2  -6   23.51    1.70
   5   2  -6   23.41    1.72
   5   2  -5    6.45    1.08
   5   2  -4   14.00    1.39
   5   2  -3   27.95    1.88
   5   2  -2    7.32    1.15
   5   2  -1   25.36    1.76
   5   2   0   13.37    1.33
   5   2   1   25.17    1.76
   5   2   2    8.64    1.14
   5   2   3   26.31    1.24
   5   2   3   30.03    1.83
   5   2   4   10.33    0.81
   5   2   4   11.29    1.20
   5   2   5    5.17    0.63
   5   2   5    4.91    0.89
   5   2   6   19.88    1.11
   5   2   6   21.24    1.46
   5   2   7   37.09    1.54
   5   2   7   39.68    1.91
   5   2   8   39.00    1.58
   5   2   8   39.09    1.84
   5   2   9   20.35    1.13
   5   2  10   48.38    1.77
   5   2  11    1.01    0.45
   5   2  12    6.91    0.70
   5   2  13   16.68    0.99
   5   2  14   17.16    0.98
   5   2  15    1.53    0.42
   5   2  16    6.31    0.60
   5   2  17   11.24    0.72
   5   2  18   11.89    0.71
   5   2  19    4.02    0.42
   5   2  20   15.88    0.72
   5   3 -18    6.36    0.54
   5   3 -18    5.79    0.53
   5   3 -17    0.60    0.38
   5   3 -17    0.52    0.32
   5   3 -16    0.46    0.38
   5   3 -15    4.14    0.61
   5   3 -10    0.89    0.66
   5   3  -9    7.48    0.97
   5   3  -8    0.82    0.66
   5   3  -7    0.60    0.59
   5   3  -7    0.69    0.64
   5   3  -6    8.05    1.03
   5   3  -6    7.36    1.01
   5   3  -5    8.21    1.04
   5   3  -5    7.69    1.04
   5   3  -4    2.13    0.81
   5   3  -3    0.80    0.32
   5   3  -3    0.66    0.67
   5   3  -2    0.83    0.33
   5   3  -2    0.07    0.66
   5   3  -1    0.44    0.34
   5   3  -1    0.73    0.66
   5   3   0    0.59    0.35
   5   3   0    0.41    0.65
   5   3   1    0.54    0.36
   5   3   1    1.27    0.67
   5   3   2    0.52    0.36
   5   3   2    0.94    0.67
   5   3   3    0.64    0.36
   5   3   3    0.89    0.63
   5   3   4    2.17    0.47
   5   3   4    1.98    0.70
   5   3   5    7.00    0.68
   5   3   5    6.32    0.88
   5   3   6    7.19    0.68
   5   3   6    7.35    0.92
   5   3   7    0.67    0.39
   5   3   7    0.67    0.56
   5   3   8    0.59    0.39
   5   3   8    0.55    0.53
   5   3   9    6.38    0.65
   5   3   9    6.17    0.77
   5   3  10    0.73    0.39
   5   3  10    0.48    0.41
   5   3  11   29.36    1.26
   5   3  11   26.36    1.27
   5   3  12    2.63    0.47
   5   3  13   15.26    0.87
   5   3  14    1.69    0.38
   5   3  15    4.12    0.46
   5   3  16    0.90    0.29
   5   3  18    5.62    0.40
   5   4 -12    5.84    0.49
   5   4 -12    6.18    0.53
   5   4 -11    0.57    0.29
   5   4 -11    0.51    0.32
   5   4 -10    0.20    0.32
   5   4 -10   -0.12    0.33
   5   4  -9    1.19    0.40
   5   4  -9    1.62    0.47
   5   4  -8    1.58    0.45
   5   4  -8    1.61    0.52
   5   4  -7    4.76    0.63
   5   4  -6    0.21    0.41
   5   4  -5    3.10    0.57
   5   4  -4    1.65    0.26
   5   4  -4    1.81    0.53
   5   4  -4    1.93    0.59
   5   4  -3    0.68    0.25
   5   4  -3    1.11    0.49
   5   4  -3    0.95    0.54
   5   4  -2    3.81    0.40
   5   4  -2    4.43    0.68
   5   4  -2    3.74    0.70
   5   4  -1    0.63    0.28
   5   4  -1    1.07    0.54
   5   4  -1    0.42    0.48
   5   4   0   25.84    1.03
   5   4   0   29.94    1.52
   5   4   1    0.79    0.30
   5   4   1    0.71    0.52
   5   4   2    3.53    0.43
   5   4   2    3.67    0.66
   5   4   3    1.22    0.33
   5   4   3    0.99    0.48
   5   4   4    1.32    0.33
   5   4   4    1.70    0.53
   5   4   5    3.24    0.41
   5   4   5    2.86    0.56
   5   4   6   -0.01    0.24
   5   4   6    0.02    0.38
   5   4   7    3.39    0.42
   5   4   7    3.55    0.54
   5   4   8    1.48    0.33
   5   4   8    1.52    0.41
   5   4   9    1.04    0.29
   5   4   9    1.34    0.36
   5   4  10    0.11    0.22
   5   4  11    0.62    0.22
   5   4  12    5.94    0.42
   0   0   0    0.00    0.00


TITL P20190927b in P2(1)2(1)2(1)
REM P2(1)2(1)2(1) (#19 in standard setting)
CELL 1.54184   4.620388   7.014399  36.146683  90.0000  90.0000  90.0000
ZERR    4.00   0.000095   0.000102   0.000454   0.0000   0.0000   0.0000
LATT -1
SYMM -x+1/2,-y, z+1/2
SYMM -x, y+1/2,-z+1/2
SYMM  x+1/2,-y+1/2,-z
SFAC C H O
UNIT 52.00 80.00 12.00
TREF
HKLF 4
END
_computing_structure_solution     'SHELXT 2018/2 (Sheldrick, 2018)'
;
_shelx_hkl_checksum                79292
_olex2_submission_special_instructions  'No special instructions were received'
_oxdiff_exptl_absorpt_empirical_details
;
Empirical correction (ABSPACK) includes:
- Absorption correction using spherical harmonics
- Frame scaling
;
_oxdiff_exptl_absorpt_empirical_full_max  1.406
_oxdiff_exptl_absorpt_empirical_full_min  0.674
